# Supplementary material for: Enantioselective 1,4-addition of kojic acid derivatives to β-nitroolefins catalyzed by a cinchonine derived sugar thiourea
Source: Royal Society of Chemistry journal article supplement (doi:10.1039/c3ra47423b), 2014-01-01
Supplement: c3ra47423b.pdf [file c3ra47423b.pdf]

## Supporting Information

### Enantioselective 1,4-addition of kojic acid derivatives to $\beta$ -nitroolefins catalyzed by a cinchonine derived sugar thiourea.

B. V. Subba Reddy,<sup>[a]\*</sup> S. Madhusudana Reddy,<sup>[a]</sup> Manisha Swain,<sup>[a]</sup>  
Srikanth Dudem,<sup>[b]</sup> Shasi V Kalivendi,<sup>[b]</sup> C. Suresh Reddy<sup>[c]</sup>

<sup>a</sup>Natural Product Chemistry, CSIR-Indian Institute of Chemical Technology,  
Hyderabad, India, 500007

<sup>b</sup>Centre for Chemical Biology, IICT, Hyderabad, 500 007, India

<sup>c</sup>Department of Chemistry, Sri Venkateswra University, Tirupati, India.

Email: [basireddy@iict.res.in](mailto:basireddy@iict.res.in)

### Contents

|                                                                        |         |
|------------------------------------------------------------------------|---------|
| 1. General remarks.                                                    | S2      |
| 2. Preparation of starting materials.                                  | S2-S4   |
| 3. General procedure for preparing thiourea catalysts.                 | S4      |
| 4. Spectral data of thiourea catalysts.                                | S4-S6   |
| 5. General procedure for Michael reaction.                             | S7      |
| 6. Characterization data of all products.                              | S7-S19  |
| 7. Copy of <sup>1</sup> H NMR and <sup>13</sup> C NMR of ligands.      | S20-S22 |
| 8. Copy of <sup>1</sup> H NMR and <sup>13</sup> C NMR of all products. | S23-S44 |

**9. HPLC diagram of all compounds.** **S45-S66**

**10. References.** **S67**

**1. General Remarks.**

All the solvents were purchased from commercial source and dried prior to use. All the enantioselective Michael reactions were performed in an oven-dried Schlenk flask under an inert atmosphere of argon. All products were purified by column chromatography on silica gel 60-120 mesh using a mixture of ethyl acetate-hexane as eluents. Progress of the reaction was monitored by Thin Layer Chromatography.  $^1\text{H}$  NMR spectra were recorded in  $\text{CDCl}_3$  using 300 MHz or 500 MHz spectrometers.  $^{13}\text{C}$  NMR spectra were recorded in  $\text{CDCl}_3$  using 75 MHz and 125 MHz NMR spectrometers. The chemical shifts ( $\delta$ ) were reported in parts per million (ppm) with respect to TMS as an internal standard. The coupling constants (J) are quoted in Hertz (Hz). Mass spectra were recorded on mass spectrometer by Electrospray ionization (ESI) technique. HPLC analysis was carried out in a Shimadzu LC-20 using chiral columns. A mixture of hexane-isopropyl alcohol was used as eluent. Optical rotations of the products were recorded on Digipol-781 M6U Polarimeter.

**2. Preparation of starting materials.**

Nitro olefins were purchased from Aldrich.

**a) General procedure for preparation of 2-(*tert*-butyldimethylsilyloxy-methyl)-5-hydroxypyrene-4-one<sup>(1)</sup> (1)**

To a stirred solution of kojic acid (5 mmol) in 25 ml  $\text{CH}_2\text{Cl}_2$ , triethylamine (10 mmol) and dimethylaminopyridine (2 mg) were added. To this mixture, *tert*-butyldimethylsilyl chloride (10 mmol) was added at  $0^\circ\text{C}$ , and then the resulting mixture was stirred at the same temperature for 1 h. Up on completion, the mixture was quenched with water, extracted with ethyl acetate and the organic layer was dried over sodium sulfate. After removal of the solvent, the residue was

then stirred for 1h in the presence of 30% formic acid/chloroform solution (25/25 ml). After the completion, the mixture was diluted with water (50 ml), extracted with chloroform and the organic layer was dried over sodium sulfate. The solvent was evaporated under reduced pressure and the residue was purified through column chromatography on silica gel (Hexane/EtOAc = 80/20) to give the 2-(*tert*-butyldimethylsilyloxymethyl)-5-hydroxypyran-4-one (white solid, 94%(1204.93 mg) of yield).

**b) General procedure for the preparation of 2-methyl-5-hydroxypyran-4-(1*H*)-one<sup>(1a)</sup> (4a)**

A mixture of kojic acid (1 mmol) and thionyl chloride (20 mmol) was stirred at room temperature for 30 min. The resulting precipitate was filtered and washed with hexane to give the product (chlorokojic acid, 98 % (157.33 mg) yield) as a white solid, which was then dissolved in 5 ml of distilled water at 50 °C. To this solution were added zinc dust (3 mmol) followed by conc. hydrochloric acid (56.1 mL) over 1 h in dropwise manner under vigorous stirring maintaining the temperature between 70 and 80 °C. The mixture was stirred for another 3h at 70 °C then the solid was removed by filtration. The filtrate was extracted with CH<sub>2</sub>Cl<sub>2</sub> and the organic extracts were dried over anhydrous sodium sulfate. The solvent was evaporated under reduced pressure and the residue was purified through column chromatography on silica gel (Hexane/EtOAc = 40/60) to give the 2-methyl-5-hydroxypyran-4(1*H*)-one in 74 % (93.32 mg) yield as a white solid.

**c) General procedure for the preparation of 2-((4-chlorophenylthio)-methyl)-5-hydroxy-4*H*-pyran-4-one<sup>(2)</sup> (4b)**

To a stirred solution of chlorokojic acid (3 mmol) and triethylamine (4 mmol) in THF (10 mL) under N<sub>2</sub> was added 4-chlorobenzenethiol (3.3 mmol). The mixture was stirred for 10 h at room temperature, after which THF was evaporated in vacuo. The residue was extracted with ethyl acetate and washed with water. The organic layer was dried over anhydrous sodium sulfate and the solvent was evaporated under reduced pressure. The resulting residue was purified through column chromatography on silica gel (Hexane/EtOAc = 3/7) to give the 2-((4-

chlorophenylthio)methyl)-5-hydroxy-4H-pyran-4-one, 75%(604.59 mg) in yield as a white solid.

### 3. General procedure for preparing thiourea catalysts.

#### a) Preparation of thiourea II

To a stirred solution of the (1*R*)-(6-methoxyquinolin-4-yl)(8-vinylquinuclidin-2-yl)methanamine<sup>(3)</sup> (4 mmol) in CH<sub>2</sub>Cl<sub>2</sub> (10 mL) was added a solution of glycosyl isothiocyanate<sup>(4)</sup> (4.4 mmol) in CH<sub>2</sub>Cl<sub>2</sub> (15 mL) in dropwise manner under N<sub>2</sub> atmosphere. The resulting mixture was stirred at room temperature until total consumption of the isothiocyanate (monitored by TLC). After removal of the solvent, the residue was purified through column chromatography on silica gel (EtOAc/MeOH = 85/15) to give the thiourea catalyst as a white solid.

#### b) Preparation of thiourea III and VI

To a solution of the corresponding chiral amine (2 mmol) in methylene chloride (8 mL) was added dropwise a solution of dehydroabiatic isothiocyanate<sup>(5)</sup> (2.4 mmol) in methylene chloride (12 mL) under nitrogen atmosphere. The resulting mixture was stirred at room temperature until total consumption of the isothiocyanate (monitored by TLC). After removal of the solvent, the residue was purified through column chromatography on silica gel (Hexane/EtOAc = 5/95).

### 4. Spectral data of thiourea catalysts.

#### Ligand II

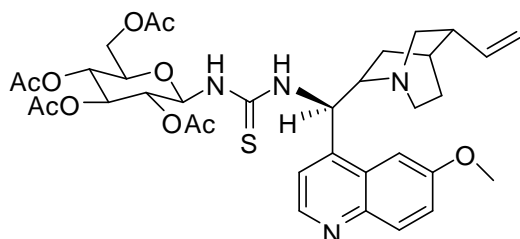

White solid, m.p. = 101-103 °C; Yield: 76% (2168.37 mg);  $[\alpha]_D^{28} = +116.8$  ( $c = 0.5$ , in CHCl<sub>3</sub>). <sup>1</sup>H NMR (300 MHz, CDCl<sub>3</sub>): δ 1.17-1.32 (m, 1H), 1.40-1.52 (m, 1H), 1.75 (s, 2H), 1.79-1.94 (m, 2H), 1.96-2.14 (m, 14H), 2.65 (brs, 1H), 3.11-3.50 (m, 2H),

3.72-3.86 (m, 1H), 4.03 (s, 3H), 4.08-4.17 (m, 1H), 4.22-4.51 (m, 5H), 4.93-5.13 (m, 2H), 5.21-5.50 (m, 2H), 5.70 (brs, 1H), 5.86-6.02 (m, 1H), 7.32-7.42 (m, 1H), 7.48 (d,  $J = 14.5$  Hz, 1H), 7.88 (brs, 1H), 7.93-8.02 (m, 1H), 8.70 (d,  $J = 4.5$  Hz, 1H);  $^{13}\text{C}$  NMR (75 MHz,  $\text{CDCl}_3$ ):  $\delta$  20.4, 20.6, 23.2, 23.9, 24.2, 26.4, 36.9, 46.2, 48.6, 55.7, 60.2, 61.5, 68.0, 70.2, 73.2, 73.3, 82.6, 101.8, 116.7, 120.3, 122.5, 127.7, 129.3, 131.3, 137.3, 142.3, 144.5, 147.3, 158.2, 169.4, 169.8, 169.9, 170.6, 178.9, 184.1. IR (KBr):  $\nu$  2935, 1752, 1622, 1545, 1373, 1227, 1035, 912, 759, 601  $\text{cm}^{-1}$ ; MS (ESI)  $m/z$  714  $[\text{M}+\text{H}]^+$ ; HRMS (ESI): Exact mass calcd for  $\text{C}_{35}\text{H}_{45}\text{O}_{10}\text{N}_4\text{S}$  713.28509. Found: 713.28602.

### Ligand III

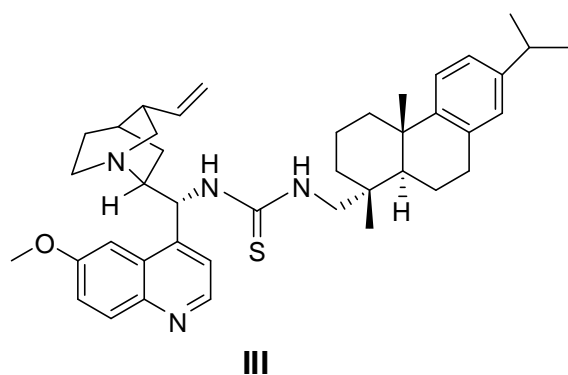

White solid, m.p. 129-131°C; Yield: 71% (924.98 mg);  $[\alpha]_{\text{D}}^{27} = +164.4$  ( $c = 0.5$ ,  $\text{CHCl}_3$ ).  $^1\text{H}$ -NMR (500 MHz,  $\text{CDCl}_3$ ):  $\delta$  0.54 (s, 3H), 0.81-1.10 (m, 7H), 1.17-1.36 (m, 11 H), 1.37-1.93 (m, 6H), 2.04-2.40 (m, 2H), 2.58-3.07 (m, 9H), 3.22 (s, 1H), 3.81 (s, 2H), 5.02-5.16 (m, 2H), 5.79-5.96 (m, 1H), 6.86 (s, 1H), 7.00 (d,  $J = 8.2$  Hz, 1H), 7.10 (d,  $J = 8.2$  Hz, 1H), 7.31-7.67 (m, 4H), 8.00 (d,  $J = 9.1$  Hz, 1H), 8.71 (s, 1H).  $^{13}\text{C}$ -NMR (75 MHz,  $\text{CDCl}_3$ ):  $\delta$  18.0, 18.2, 18.8, 23.9, 25.1, 26.3, 27.2, 30.1, 33.4, 35.9, 36.9, 37.2, 37.8, 38.6, 45.9, 46.7, 48.9, 55.5, 56.6, 114.8, 122.6, 123.8, 124.1, 126.7, 128.6, 131.9, 134.4, 140.2, 144.8, 145.5, 146.8, 147.6, 158.2, 182.1. IR (KBr):  $\nu$  3372, 3067, 2930, 1711, 1620, 1552, 1378, 1235, 1028, 829, 724  $\text{cm}^{-1}$ . HRMS (ESI) calcd for  $\text{C}_{41}\text{H}_{55}\text{ON}_4\text{S}$ : 651.4091, found: 651.4092.

## Ligand VI

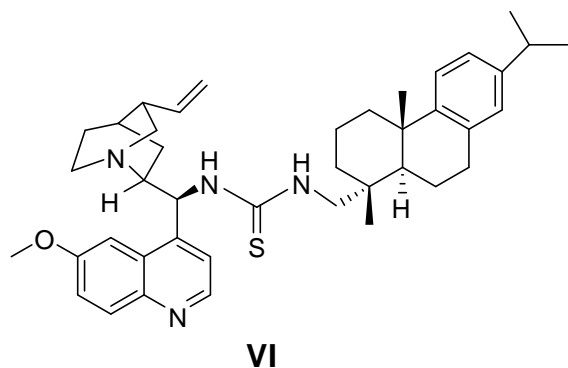

White solid, m.p. 132-134°C; Yield: 70% (911.96 mg);  $[\alpha]_D^{27} = -69.2$  ( $c = 0.5$ ,  $\text{CHCl}_3$ ).  $^1\text{H-NMR}$  (300 MHz,  $\text{CDCl}_3$ ):  $\delta$  0.86 (s, 3H), 1.01-1.36 (m, 16H), 1.43-1.77 (m, 3H), 1.79-2.00 (m, 5H), 2.13-2.32 (m, 1H), 2.35-3.00 (m, 6H), 3.14-3.91 (m, 4H), 4.01 (s, 3H), 4.96-5.19 (m, 2H), 5.55-5.74 (m, 1H), 6.18-6.65 (s, 1H), 6.78-6.92 (m, 1H), 6.97 (d,  $J = 8.12$  Hz, 1H), 7.14 (d,  $J = 8.1$  Hz, 1H), 7.29-7.61 (m, 2H), 7.86-8.08 (m, 2H), 8.66-8.79 (m, 1H).  $^{13}\text{C-NMR}$  (75 MHz,  $\text{CDCl}_3$ ):  $\delta$  18.5, 19.1, 23.7, 23.9, 24.8, 25.2, 26.7, 29.8, 33.3, 35.8, 36.8, 37.2, 37.5, 37.8, 40.9, 44.9, 53.5, 55.2, 55.8, 59.8, 102.1, 116.9, 120.7, 122.3, 123.5, 123.9, 126.5, 127.7, 131.5, 134.7, 137.0, 142.7, 144.8, 145.2, 147.1, 147.5, 158.2, 182.7. IR (KBr):  $\nu$  3417, 3069, 2929, 1711, 1620, 1548, 1376, 1236, 1029, 826, 738  $\text{cm}^{-1}$ ; HRMS (ESI) calcd for  $\text{C}_{41}\text{H}_{55}\text{ON}_4\text{S}$ : 651.4091, found: 651.4092.

## 5. General procedure for Michael reaction.

To a stirred solution of organocatalyst II (5 mol %) and nitro olefin (2) (0.11 mmol) in *i*-PrOH (1 mL) at 5 °C was added 2-((*tert*-butyldimethylsilyloxy)-methyl)-5-hydroxy-4H-pyran-4-one (1) (0.1 mmol). The resulting mixture was stirred for 7 h at the same temperature. After completion of the reaction, the mixture was concentrated in vacuo and the resulting residue was purified by column chromatography on silica gel (hexane/EtOAc) to afford the optical pure Michael adduct.

## 6. Characterization data of all products.

**(*R*)-6-((*tert*-Butyldimethylsilyloxy)methyl)-3-hydroxy-2-(2-nitro-1-phenylethyl)-4H-pyran-4-one (3a).**<sup>(6)</sup>

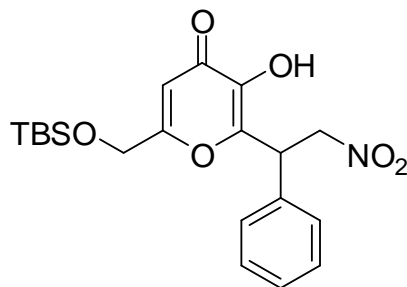

Brown solid; m.p. 158-159 °C (Lit. m.p. 159-160 °C)<sup>(6)</sup>; Yield 97% (39.33 mg);  $[\alpha]_D^{27} = +69.2$  ( $c = 0.5$ ,  $\text{CHCl}_3$ ). The ee was determined by HPLC using a DaicelChiralcel OJ-H column, *n*-hexane/*i*-PrOH 90:10, flow rate 1.00 mL/min, 254 nm;  $t_{\text{major}} = 10.9$  min,  $t_{\text{minor}} = 17.15$  min (99% ee);  $^1\text{H-NMR}$  (300 MHz,  $\text{CDCl}_3$ ):  $\delta$  0.11 (s, 6H), 0.92 (s, 9H), 4.48 (s, 2H), 4.90 (dd,  $J = 6.8, 13.6$  Hz, 1H), 5.01-5.11 (m, 1H), 5.20 (dd,  $J = 9.1, 13.6$  Hz, 1H), 6.50 (s, 1H), 7.35 (m, 5H).  $^{13}\text{C-NMR}$  (75 MHz,  $\text{CDCl}_3$ ):  $\delta$  -5.6, 18.0, 25.6, 29.6, 43.3, 61.4, 75.4, 108.5, 127.7, 128.5, 129.4, 135.3, 142.0, 146.0, 167.5, 173.9. IR (KBr):  $\nu$  3251, 2930, 2855, 1652, 1630, 1590, 1551, 1456, 1377, 1252, 1217, 1083, 949, 842, 780, 699  $\text{cm}^{-1}$ .

**(*R*)-6-((*tert*-Butyldimethylsilyloxy)methyl)-2-(1-(4-fluorophenyl)-2-nitroethyl)-3-hydroxy-4H-pyran-4-one (3b).**<sup>(6)</sup>

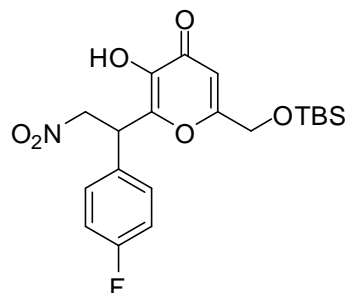

Brown solid; m.p. 153-155 °C (Lit. m.p. 154-155 °C)<sup>(6)</sup>; Yield: 98% (41.50 mg);  $[\alpha]_D^{27} = +59.2$  ( $c = 0.5$ ,  $\text{CHCl}_3$ ). The ee was determined by HPLC using a DaicelChiralcel OJ-H column, n-hexane/*i*-PrOH 90:10, flow rate 1.00 mL/min, 254 nm;  $t_{\text{major}} = 12.8$  min,  $t_{\text{minor}} = 20.2$  min (96% ee);  $^1\text{H-NMR}$  (300 MHz,  $\text{CDCl}_3$ ):  $\delta$  0.11 (s, 6H), 0.92 (s, 9H), 4.48 (s, 2H), 4.89 (dd,  $J = 6.8, 12.8$  Hz, 1H), 5.01-5.10 (m, 1H), 5.16 (dd,  $J = 9.1, 12.8$  Hz, 1H), 6.51 (s, 1H), 7.05 (t,  $J = 8.3$  Hz, 2H), 7.28-7.40 (m, 2H).  $^{13}\text{C-NMR}$  (75 MHz,  $\text{CDCl}_3$ ):  $\delta$  -5.5, 18.2, 25.6, 42.6, 61.3, 75.3, 108.6, 116.1, 116.4, 129.5, 131.1, 142.0, 145.7, 161.0, 164.2, 167.5, 174.0. IR (KBr):  $\nu$  3251, 2935, 2859, 1630, 1592, 1553, 1511, 1458, 1373, 1242, 1090, 842, 778  $\text{cm}^{-1}$ .

**(*R*)-6-((*tert*-Butyldimethylsilyloxy)methyl)-2-(1-(4-chlorophenyl)-2-nitroethyl)-3-hydroxy-4*H*-pyran-4-one (3c).**<sup>(6)</sup>

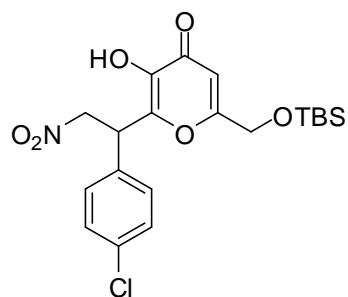

Brown solid; m.p. 74-76 °C (Lit. m.p. 74-75 °C)<sup>(6)</sup>; Yield: 97% (42.67 mg);  $[\alpha]_D^{27} = +68.1$  ( $c = 0.5$ ,  $\text{CHCl}_3$ ). The ee was determined by HPLC using a DaicelChiralcel OJ-H column, n-hexane/*i*-PrOH 90:10, flow rate 1.00 mL/min, 254 nm;  $t_{\text{major}} = 16.7$  min,  $t_{\text{minor}} = 24.1$  min (94% ee);  $^1\text{H-NMR}$  (300 MHz,  $\text{CDCl}_3$ ):  $\delta$  0.11 (s, 6H), 0.92 (s, 9H), 4.47 (s, 2H), 4.90 (dd,  $J = 6.8, 12.8$  Hz, 1H), 5.00-5.08 (m, 1H), 5.16 (dd,  $J = 8.3, 12.8$  Hz, 1H), 6.51 (s, 1H), 7.25-7.39 (m, 5H).  $^{13}\text{C-NMR}$  (75 MHz,  $\text{CDCl}_3$ ):  $\delta$  -5.5, 18.2, 25.6, 42.6, 61.3, 75.1, 108.6, 129.1, 129.5, 133.7, 134.6, 142.0, 145.4, 167.6,



173.9. IR (KBr):  $\nu$  3250, 2932, 2857, 1629, 1589, 1553, 1457, 1372, 1252, 1220, 1088, 840, 780  $\text{cm}^{-1}$ .

**(R)-2-(1-(4-Bromophenyl)-2-nitroethyl)-6-((tert-butyl dimethylsilyloxy)methyl)-3-hydroxy-4H-pyran-4-one (3d).**<sup>(6)</sup>

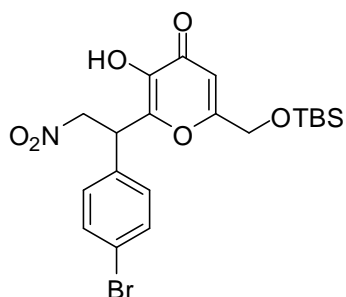

Brown solid; m.p. 135-137 °C (Lit. m.p. 137-138 °C)<sup>(6)</sup>; Yield: 95% (46.01 mg);  $[\alpha]_D^{27} = +68.1$  ( $c = 0.5$ ,  $\text{CHCl}_3$ ). The ee was determined by HPLC using a DaicelChiralcel OJ-H column, n-hexane/*i*-PrOH 95:5, flow rate 1.00 mL/min, 254 nm;  $t_{\text{major}} = 40.8$  min,  $t_{\text{minor}} = 54.1$  min (94% ee);  $^1\text{H-NMR}$  (300 MHz,  $\text{CDCl}_3$ ):  $\delta$  0.11 (s, 6H), 0.92 (s, 9H), 4.48 (s, 2H), 4.90 (dd,  $J = 6.8, 12.8$  Hz, 1H), 5.00-5.08 (m, 1H), 5.16 (dd,  $J = 9.1, 12.8$  Hz, 1H), 6.58 (s, 1H), 7.20-7.30 (m, 2H), 7.50 (d, 2H,  $J = 8.3$  Hz).  $^{13}\text{C-NMR}$  (75 MHz,  $\text{CDCl}_3$ ):  $\delta$  -5.5, 18.2, 25.6, 42.7, 61.3, 75.0, 108.6, 108.9, 122.7, 129.4, 132.5, 134.3, 137.3, 142.0, 145.3, 167.6, 173.9. IR (KBr):  $\nu$  3237, 2930, 2857, 1653, 1629, 1589, 1552, 1455, 1375, 1253, 1211, 1090, 840, 780  $\text{cm}^{-1}$ .

**(R)-6-((tert-Butyl dimethylsilyloxy)methyl)-3-hydroxy-2-(2-nitro-1-p-tolyloethyl)-4H-pyran-4-one (3e).**<sup>(6)</sup>

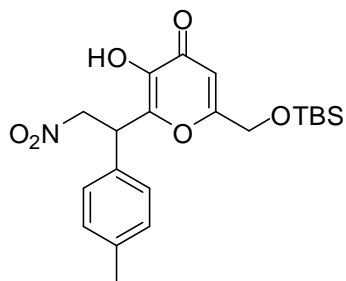

Brown solid; m.p. 124-126 °C (Lit. m.p. 123-124 °C)<sup>(6)</sup>; Yield: 90% (37.75 mg);  $[\alpha]_D^{27} = +111.6$  ( $c = 0.5$ ,  $\text{CHCl}_3$ ). The ee was determined by HPLC using a DaicelChiralcel OJ-H column, n-hexane/*i*-PrOH 95:5, flow rate 1.00 mL/min, 254

nm;  $t_{\text{major}} = 14.6$  min,  $t_{\text{minor}} = 20.1$  min (91% ee);  $^1\text{H-NMR}$  (300 MHz,  $\text{CDCl}_3$ ):  $\delta$  0.11 (s, 6H), 0.92 (s, 9H), 2.33 (s, 3H), 4.48 (s, 2H), 4.87 (dd,  $J = 6.6, 13.0$  Hz, 1H), 4.98-5.09 (m, 1H), 5.17 (dd,  $J = 9.1, 13.0$  Hz, 1H), 6.50 (s, 1H), 7.12-7.34 (m, 4H).  $^{13}\text{C-NMR}$  (75 MHz,  $\text{CDCl}_3$ ):  $\delta$  -5.5, 18.2, 21.0, 25.7, 43.0, 61.4, 75.5, 108.4, 108.8, 127.6, 129.9, 132.3, 137.1, 138.4, 141.9, 145.5, 168.5, 174.3. IR (KBr):  $\nu$  3251, 2929, 2855, 1652, 1630, 1589, 1553, 1455, 1378, 1253, 1215, 1081, 843, 782  $\text{cm}^{-1}$ .

**(*R*)-6-((*tert*-Butyldimethylsilyloxy)methyl)-3-hydroxy-2-(1-(4-methoxyphenyl)-2-nitroethyl)-4*H*-pyran-4-one (3f).**<sup>(6)</sup>

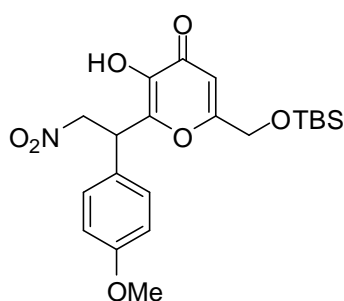

Brown solid; m.p. 143-145 °C (Lit. m.p. 142-143 °C)<sup>(6)</sup>; Yield: 95% (41.37 mg);  $[\alpha]_{\text{D}}^{27} = +118.6$  ( $c = 0.5$ ,  $\text{CHCl}_3$ ). The ee was determined by HPLC using a DaicelChiralcel OJ-H column, n-hexane/*i*-PrOH 90:10, flow rate 1.00 mL/min, 254 nm;  $t_{\text{major}} = 19.9$  min,  $t_{\text{minor}} = 30.8$  min (91% ee);  $^1\text{H-NMR}$  (300 MHz,  $\text{CDCl}_3$ ):  $\delta$  0.11 (s, 6H), 0.92 (s, 9H), 3.79 (s, 3H), 4.48 (s, 2H), 4.86 (dd,  $J = 6.6, 12.8$  Hz, 1H), 4.97-5.04 (m, 1H), 5.16 (dd,  $J = 8.9, 13.0$  Hz, 1H), 6.49 (s, 1H), 6.88 (d,  $J = 8.9$  Hz, 2H), 7.26 (d,  $J = 8.9$  Hz, 3H).  $^{13}\text{C-NMR}$  (75 MHz,  $\text{CDCl}_3$ ):  $\delta$  -5.5, 18.1, 25.6, 42.6, 55.2, 61.3, 75.5, 108.5, 108.9, 114.6, 127.2, 128.9, 137.3, 141.8, 145.5, 146.3, 159.6, 167.4, 168.5, 173.9. IR (KBr):  $\nu$  3244, 2953, 2931, 2855, 1655, 1630, 1592, 1548, 1513, 1456, 1374, 1253, 1229, 1084, 839, 778  $\text{cm}^{-1}$ .

**(*R*)-6-((*tert*-Butyldimethylsilyloxy)methyl)-2-(1-(3-fluorophenyl)-2-nitroethyl)-3-hydroxy-4*H*-pyran-4-one (3g).**

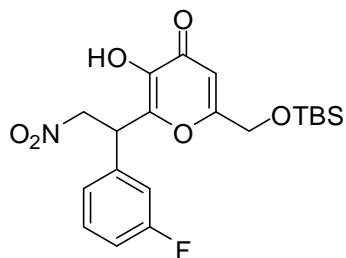

Brown solid; m.p. 139-141 °C; Yield: 96% (40.65 mg);  $[\alpha]_D^{27} = +42.6$  ( $c = 0.5$ ,  $\text{CHCl}_3$ ). The ee was determined by HPLC using a DaicelChiralcel OJ-H column, n-hexane/*i*-PrOH 90:10, flow rate 1.00 mL/min, 254 nm;  $t_{\text{major}} = 14.2$  min,  $t_{\text{minor}} = 22.1$  min (85% ee);  $^1\text{H-NMR}$  (300 MHz,  $\text{CDCl}_3$ ):  $\delta$  0.11 (s, 6H), 0.92 (s, 9H), 4.49 (s, 2H), 4.91 (dd,  $J = 6.8, 12.8$  Hz, 1H), 5.03-5.11 (m, 1H), 5.17 (dd,  $J = 9.1, 12.8$  Hz, 1H), 6.51 (s, 1H), 6.98-7.18 (m, 3H), 7.29-7.39 (m, 1H).  $^{13}\text{C-NMR}$  (75 MHz,  $\text{CDCl}_3$ ):  $\delta$  -5.5, 25.6, 42.8, 61.3, 75.0, 108.6, 114.7, 115.5, 123.5, 130.8, 137.5, 142.2, 145.3, 164.6, 167.6, 174.0. IR (KBr):  $\nu$  3256, 2955, 2932, 2858, 1653, 1630, 1590, 1552, 1451, 1378, 1251, 1085, 841, 781, 704  $\text{cm}^{-1}$ . HRMS (ESI) calcd for  $\text{C}_{20}\text{H}_{27}\text{O}_6\text{FNSi}$ : 424.1586, found: 424.1575.

**(*R*)-6-((*tert*-Butyldimethylsilyloxy)methyl)-2-(1-(3-chlorophenyl)-2-nitroethyl)-3-hydroxy-4*H*-pyran-4-one (3h).**

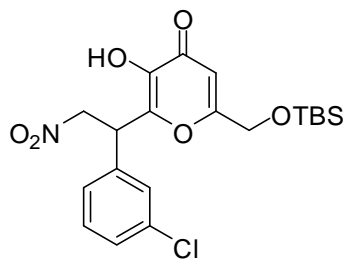

Brown solid; m.p. 128-130 °C; Yield: 95% (41.79 mg);  $[\alpha]_D^{27} = +58.6$  ( $c = 0.5$ ,  $\text{CHCl}_3$ ). The ee was determined by HPLC using a DaicelChiralcel OJ-H column, n-hexane/*i*-PrOH 90:10, flow rate 1.00 mL/min, 254 nm;  $t_{\text{major}} = 13.8$  min,  $t_{\text{minor}} = 28.1$  min (88% ee);  $^1\text{H-NMR}$  (300 MHz,  $\text{CDCl}_3$ ):  $\delta$  0.11 (s, 6H), 0.92 (s, 9H), 4.49 (s, 2H), 4.90 (dd,  $J = 6.8, 12.8$  Hz, 1H), 5.00-5.07 (m, 1H), 5.12-5.23 (m, 1H), 6.52 (s, 1H), 7.21-7.37 (m, 5H).  $^{13}\text{C-NMR}$  (75 MHz,  $\text{CDCl}_3$ ):  $\delta$  -5.5, 18.1, 25.7, 42.9, 61.4, 75.0, 108.6, 125.9, 127.9, 128.8, 130.5, 135.1, 137.2, 142.0, 145.1, 167.7, 173.9. IR (KBr):  $\nu$  3251, 2953, 2930, 2857, 1653, 1629, 1590, 1552, 1456, 1375, 1252, 1213,

1086, 841, 781, 686  $\text{cm}^{-1}$ . HRMS (ESI) calcd for  $\text{C}_{20}\text{H}_{27}\text{O}_6\text{ClNSi}$ : 440.1290, found: 440.1290.

**(R)-6-((tert-Butyldimethylsilyloxy)methyl)-2-(1-(2-fluorophenyl)-2-nitroethyl)-3-hydroxy-4H-pyran-4-one (3i).**

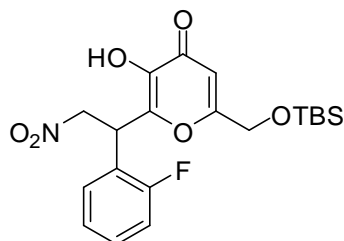

Brown solid; m.p. 114-116 °C; Yield: 99% (41.92 mg);  $[\alpha]_{\text{D}}^{27} = +64.2$  ( $c = 0.5$ ,  $\text{CHCl}_3$ ). The ee was determined by HPLC using a DaicelChiralcel OJ-H column, n-hexane/*i*-PrOH 90:10, flow rate 1.00 mL/min, 254 nm;  $t_{\text{major}} = 9.9$  min,  $t_{\text{minor}} = 15.1$  min (95% ee);  $^1\text{H-NMR}$  (300 MHz,  $\text{CDCl}_3$ ):  $\delta$  0.11 (s, 6H), 0.92 (s, 9H), 4.48 (s, 2H), 4.90 (dd,  $J = 7.5, 13.6$  Hz, 1H), 5.18-5.29 (m, 1H), 5.31-5.40 (m, 1H), 6.53 (s, 1H), 7.05-7.19 (m, 2H), 7.28-7.40 (m, 2H).  $^{13}\text{C-NMR}$  (125 MHz,  $\text{CDCl}_3$ ):  $\delta$  -5.5, 18.2, 25.6, 37.6, 61.3, 73.9, 108.4, 116.1, 116.3, 122.0, 122.2, 129.5, 130.3, 130.4, 142.4, 144.6, 159.4, 161.3, 167.8, 173.9. IR (KBr):  $\nu$  3255, 2928, 2854, 1652, 1631, 1592, 1550, 1456, 1374, 1253, 1228, 1080, 952, 842, 748, 754, 683  $\text{cm}^{-1}$ . HRMS (ESI) calcd for  $\text{C}_{20}\text{H}_{27}\text{O}_6\text{FNSi}$ : 424.1586, found: 424.1602.

**(R)-6-((tert-Butyldimethylsilyloxy)methyl)-2-(1-(2-chlorophenyl)-2-nitroethyl)-3-hydroxy-4H-pyran-4-one (3j).<sup>(6)</sup>**

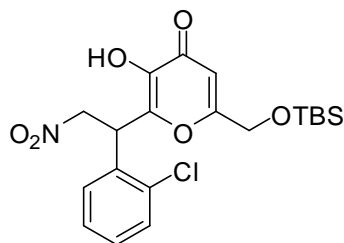

Brown solid; m.p. 72-74 °C (Lit. m.p. 71-72 °C)<sup>(6)</sup>; Yield: 98% (43.11 mg);  $[\alpha]_{\text{D}}^{27} = +78.1$  ( $c = 0.5$ ,  $\text{CHCl}_3$ ). The ee was determined by HPLC using a DaicelChiralcel OJ-H column, n-hexane/*i*-PrOH 95:5, flow rate 1.00 mL/min, 254 nm;  $t_{\text{major}} = 13.6$  min,  $t_{\text{minor}} = 22.7$  min (88% ee);  $^1\text{H-NMR}$  (300 MHz,  $\text{CDCl}_3$ ):  $\delta$  0.11 (s, 6H), 0.92 (s, 9H),

4.41-4.55 (m, 2H), 4.84 (dd,  $J = 5.7, 14.2$  Hz, 1H), 5.20 (dd,  $J = 10.2, 14.2$  Hz, 1H), 5.55 (dd,  $J = 5.7, 10.2$  Hz, 1H), 6.53 (s, 1H), 7.22-7.35 (m, 4H), 7.41-7.49 (m, 1H).  $^{13}\text{C}$ -NMR (75 MHz,  $\text{CDCl}_3$ ):  $\delta$  -5.5, 18.2, 25.7, 40.7, 61.4, 73.7, 108.5, 127.6, 128.9, 129.8, 130.4, 132.8, 133.8, 142.7, 144.8, 167.8, 173.9. IR (KBr):  $\nu$  3230, 2954, 2931, 2857, 1660, 1632, 1554, 1459, 1317, 1254, 1230, 1139, 843, 778, 685  $\text{cm}^{-1}$ .

**(*R*)-2-(1-(2-Bromophenyl)-2-nitroethyl)-6-((*tert*-butyldimethylsilyloxy)methyl)-3-hydroxy-4*H*-pyran-4-one (3k).<sup>(6)</sup>**

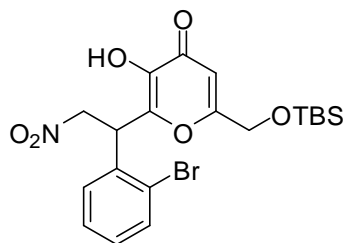

Brown solid; m.p. 60-62 °C (Lit. m.p. 59-60 °C)<sup>(6)</sup>; Yield: 96% (46.50 mg);  $[\alpha]_{\text{D}}^{27} = +112.4$  ( $c = 0.5$ ,  $\text{CHCl}_3$ ). The ee was determined by HPLC using a DaicelChiralcel OJ-H column, *n*-hexane/*i*-PrOH 90:10, flow rate 1.00 mL/min, 254 nm;  $t_{\text{major}} = 9.4$  min,  $t_{\text{minor}} = 14.8$  min (91% ee);  $^1\text{H}$ -NMR (300 MHz,  $\text{CDCl}_3$ ):  $\delta$  0.11 (s, 6H), 0.92 (s, 9H), 4.40-4.56 (m, 2H), 4.83 (dd,  $J = 5.5, 14.2$  Hz, 1H), 5.19 (dd,  $J = 10.4, 14.2$  Hz, 1H), 5.55 (dd,  $J = 5.5, 10.2$  Hz, 1H), 6.53 (s, 1H), 7.16-7.37 (m, 4H), 7.64 (dd,  $J = 8.3$  Hz, 1H).  $^{13}\text{C}$ -NMR (75 MHz,  $\text{CDCl}_3$ ):  $\delta$  -5.5, 18.1, 25.6, 43.2, 61.3, 73.7, 108.4, 124.2, 128.3, 128.9, 130.0, 133.7, 134.4, 142.7, 144.9, 167.9, 173.9. IR (KBr):  $\nu$  3239, 2935, 2861, 1659, 1631, 1591, 1552, 1457, 1251, 1217, 1093, 847, 778  $\text{cm}^{-1}$ .

**(*R*)-6-((*tert*-Butyldimethylsilyloxy)methyl)-3-hydroxy-2-(1-(2-methoxyphenyl)-2-nitroethyl)-4*H*-pyran-4-one (3l).**

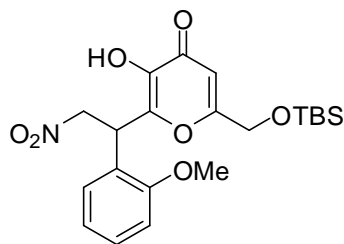

Brown solid; m.p. 110-112 °C; Yield: 97% (42.24 mg);  $[\alpha]_{\text{D}}^{27} = +107.2$  ( $c = 0.5$ ,  $\text{CHCl}_3$ ). The ee was determined by HPLC using a DaicelChiralcel OJ-H column, *n*-

hexane/*i*-PrOH 90:10, flow rate 1.00 mL/min, 254 nm;  $t_{\text{major}} = 10.1$  min,  $t_{\text{minor}} = 16.8$  min (88% ee);  $^1\text{H-NMR}$  (300 MHz,  $\text{CDCl}_3$ ):  $\delta$  0.11 (s, 6H), 0.92 (s, 9H), 3.88 (s, 3H), 4.48 (s, 2H), 4.77-4.87 (m, 1H), 5.10-5.21 (m, 1H), 5.44 (dd,  $J = 5.3, 10.6$  Hz, 1H), 6.54 (s, 1H), 6.87-7.01 (m, 2H), 7.09-7.17 (m, 1H), 7.25-7.39 (m, 3H).  $^{13}\text{C-NMR}$  (125 MHz,  $\text{CDCl}_3$ ):  $\delta$  -5.5, 18.2, 25.7, 38.1, 55.6, 61.4, 74.0, 108.1, 111.0, 121.0, 123.3, 127.0, 128.6, 129.6, 132.1, 134.4, 146.3, 156.6, 167.4, 174.6. IR (KBr):  $\nu$  3265, 2953, 2931, 2858, 1650, 1615, 1558, 1462, 1318, 1250, 1204, 1141, 1027, 841, 784, 756  $\text{cm}^{-1}$ . HRMS (ESI) calcd for  $\text{C}_{21}\text{H}_{30}\text{O}_7\text{NSi}$ : 436.1786, found: 436.1792.

**(*R*)-6-((*tert*-Butyldimethylsilyloxy)methyl)-3-hydroxy-2-(1-(naphthalen-2-yl)-2-nitroethyl)-4*H*-pyran-4-one (3m)**

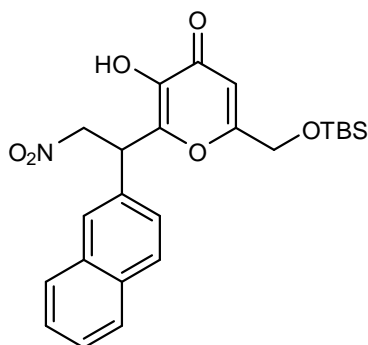

Brown solid; m.p. 116-118 °C; Yield: 93% (42.36 mg);  $[\alpha]_{\text{D}}^{27} = +57.4$  ( $c = 0.5$ ,  $\text{CHCl}_3$ ). The ee was determined by HPLC using a DaicelChiralcel OJ-H column, n-hexane/*i*-PrOH 90:10, flow rate 1.00 mL/min, 254 nm;  $t_{\text{major}} = 28.6$  min,  $t_{\text{minor}} = 52.3$  min (91% ee);  $^1\text{H-NMR}$  (300 MHz,  $\text{CDCl}_3$ ):  $\delta$  0.11 (s, 6H), 0.92 (s, 9H), 4.48 (s, 2H), 5.02 (dd,  $J = 6.0, 12.1$  Hz, 1H), 5.17-5.37 (m, 2H), 6.51 (s, 1H), 7.41-7.56 (m, 3H), 7.74-7.88 (m, 4H).  $^{13}\text{C-NMR}$  (75 MHz,  $\text{CDCl}_3$ ):  $\delta$  -5.5, 18.2, 25.7, 43.6, 61.4, 75.3, 108.5, 125.0, 126.7, 127.0, 127.7, 127.9, 129.3, 132.7, 133.0, 133.3, 137.2, 142.1, 145.6, 145.8, 167.6, 173.9. IR (KBr):  $\nu$  3237, 2952, 2930, 2856, 1653, 1627, 1589, 1549, 1455, 1374, 1253, 1209, 1086, 948, 841, 780, 743  $\text{cm}^{-1}$ . HRMS (ESI) calcd for  $\text{C}_{24}\text{H}_{30}\text{O}_6\text{NSi}$ : 456.1836, found: 456.1841.

**(*R*)-2-(1-(2-(Benzyloxy)phenyl)-2-nitroethyl)-6-((*tert*-butyldimethylsilyloxy)methyl)-3-hydroxy-4*H*-pyran-4-one (3n).**

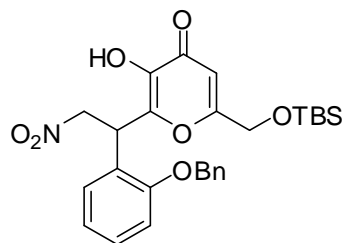

Brown solid; m.p. 144-146 °C; Yield: 92% (47.12 mg);  $[\alpha]_D^{27} = +78.2$  ( $c = 0.5$ ,  $\text{CHCl}_3$ ). The ee was determined by HPLC using a DaicelChiralcel OJ-H column, *n*-hexane/*i*-PrOH 98:2, flow rate 1.00 mL/min, 254 nm;  $t_{\text{major}} = 71.4$  min,  $t_{\text{minor}} = 88.4$  min (84% ee);  $^1\text{H-NMR}$  (300 MHz,  $\text{CDCl}_3$ ):  $\delta$  0.09 (s, 6H), 0.92 (s, 9H), 4.30 (s, 2H), 4.84 (dd,  $J = 5.3, 13.6$  Hz, 1H), 5.01-5.24 (m, 3H), 5.47 (dd,  $J = 5.3, 9.8$  Hz, 1H), 6.50 (s, 1H), 6.87-7.05 (m, 2H), 7.17-7.49 (m, 8H).  $^{13}\text{C-NMR}$  (75 MHz,  $\text{CDCl}_3$ ):  $\delta$  -5.5, 18.1, 25.6, 38.4, 61.1, 70.3, 73.9, 108.1, 112.3, 121.3, 123.4, 127.3, 128.7, 129.0, 129.7, 136.2, 142.5, 145.9, 145.8, 155.8, 167.6, 173.9. IR (KBr):  $\nu$  3274, 2928, 2853, 1650, 1616, 1581, 1554, 1495, 1459, 1326, 1243, 1123, 1013, 843, 782, 752, 693  $\text{cm}^{-1}$ . HRMS (ESI) calcd for  $\text{C}_{27}\text{H}_{34}\text{O}_7\text{NSi}$ : 512.2099, found: 512.2091.

**(*R*)-6-((*tert*-Butyldimethylsilyloxy)methyl)-2-(1-(2,4-dichlorophenyl)-2-nitroethyl)-3-hydroxy-4*H*-pyran-4-one (3o).**<sup>(6)</sup>

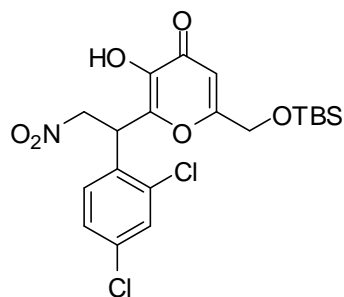

Brown solid; m.p. 52-54 °C (Lit. m.p. 51-52 °C)<sup>(6)</sup> Yield: 95% (45.06 mg);  $[\alpha]_D^{27} = +56.2$  ( $c = 0.5$ ,  $\text{CHCl}_3$ ). The ee was determined by HPLC using a DaicelChiralcel OJ-H column, *n*-hexane/*i*-PrOH 95:5, flow rate 1.00 mL/min, 254 nm;  $t_{\text{major}} = 13.6$  min,  $t_{\text{minor}} = 22.8$  min (87% ee);  $^1\text{H-NMR}$  (300 MHz,  $\text{CDCl}_3$ ):  $\delta$  0.11 (s, 6H), 0.92 (s, 9H), 4.39- 4.55 (m, 2H), 4.84 (dd,  $J = 5.8, 14.2$  Hz, 1H), 5.14-5.26 (m, 1H), 5.55 (dd,  $J = 5.7, 10.2$  Hz, 1H), 6.53 (s, 1H), 7.24-7.34 (m, 3H), 7.42-7.49 (s, 1H).  $^{13}\text{C-NMR}$  (75 MHz,  $\text{CDCl}_3$ ):  $\delta$  -5.5, 18.2, 25.6, 40.6, 61.3, 73.6, 108.4, 127.6, 128.9, 129.8, 130.3,

132.7, 133.7, 142.7, 144.8, 167.9, 173.9. IR (KBr):  $\nu$  3230, 2931, 2858, 1633, 1555, 1463, 1318, 1229, 1138, 844, 779  $\text{cm}^{-1}$ .

**(R)-6-((tert-Butyldimethylsilyloxy)methyl)-2-(1-(3,4-dichlorophenyl)-2-nitroethyl)-3-hydroxy-4H-pyran-4-one (3p).**

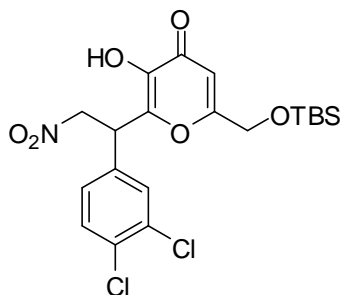

Brown solid; m.p. 116-118°C; Yield: 94% (44.59 mg);  $[\alpha]_D^{27} = +59.1$  ( $c = 0.5$ ,  $\text{CHCl}_3$ ). The ee was determined by HPLC using a DaicelChiralcel OJ-H column, *n*-hexane/*i*-PrOH 90:10, flow rate 1.00 mL/min, 254 nm;  $t_{\text{major}} = 16.1$  min,  $t_{\text{minor}} = 31.6$  min (91% ee);  $^1\text{H-NMR}$  (300 MHz,  $\text{CDCl}_3$ ):  $\delta$  0.11 (s, 6H), 0.92 (s, 9H), 4.44- 4.53 (m, 2H), 4.91 (dd,  $J = 6.0, 12.8$  Hz, 1H), 4.98-5.07 (m, 1H), 5.15 (dd,  $J = 8.3, 12.8$  Hz, 1H), 6.52 (s, 1H), 7.19-7.24 (m, 3H), 7.42-7.48 (m, 2H).  $^{13}\text{C-NMR}$  (75 MHz,  $\text{CDCl}_3$ ):  $\delta$  -5.4, 18.2, 25.7, 42.5, 61.4, 74.8, 108.7, 127.1, 129.8, 131.3, 133.1, 133.5, 135.4, 142.1, 144.8, 167.8, 173.8. IR (KBr):  $\nu$  3250, 2953, 2857, 1656, 1629, 1548, 1456, 1369, 1252, 1229, 1092, 840, 781  $\text{cm}^{-1}$ . HRMS (ESI) calcd for  $\text{C}_{20}\text{H}_{26}\text{O}_6\text{NCl}_2\text{Si}$ : 474.0901, found: 474.0919.

**(R)-6-((tert-Butyldimethylsilyloxy)methyl)-2-(1-(3,5-dimethylphenyl)-2-nitroethyl)-3-hydroxy-4H-pyran-4-one (3q).**

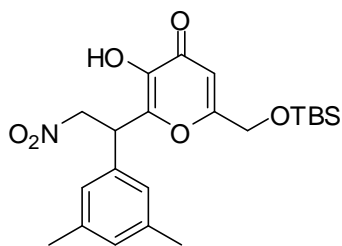

Brown solid; m.p. 96-98 °C; Yield: 90% (39.07 mg);  $[\alpha]_D^{27} = +96.4$  ( $c = 0.5$ ,  $\text{CHCl}_3$ ). The ee was determined by HPLC using a DaicelChiralcel OJ-H column, *n*-hexane/*i*-PrOH 95:05, flow rate 1.00 mL/min, 254 nm;  $t_{\text{major}} = 9.9$  min,  $t_{\text{minor}} = 12.7$  min (95%



ee);  $^1\text{H-NMR}$  (300 MHz,  $\text{CDCl}_3$ ):  $\delta$  0.11 (s, 6H), 0.92 (s, 9H), 2.29 (s, 6H), 4.48(s, 2H), 4.86 (dd,  $J = 6.8, 12.8$  Hz, 1H), 4.94-5.04 (m, 1H), 5.12-5.25 (m, 1H), 6.52 (s, 1H), 6.87-6.99 (m, 2H).  $^{13}\text{C-NMR}$  (75 MHz,  $\text{CDCl}_3$ ):  $\delta$  -5.5, 21.3, 25.7, 43.3, 61.4, 75.3, 108.4, 125.4, 130.2, 135.2, 138.9, 141.9, 146.1, 167.5, 173.9. IR (KBr):  $\nu$  3273, 2931, 2858, 1626, 1589, 1557, 1460, 1374, 1253, 1127, 841, 781, 712  $\text{cm}^{-1}$ . HRMS (ESI) calcd for  $\text{C}_{22}\text{H}_{32}\text{O}_6\text{NSi}$ : 434.1993, found: 434.2000.

**(*R*)-6-((*tert*-Butyldimethylsilyloxy)methyl)-2-(1-(furan-2-yl)-2-nitroethyl)-3-hydroxy-4*H*-pyran-4-one (3r).**

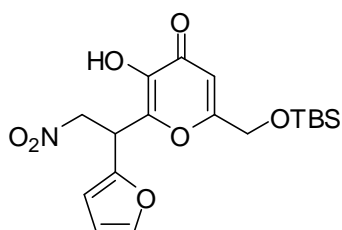

Brown solid; m.p. 102-104 °C; Yield: 94% (37.23 mg);  $[\alpha]_D^{27} = +86.3$  ( $c = 0.5$ ,  $\text{CHCl}_3$ ). The ee was determined by HPLC using a DaicelChiralcel OJ-H column, n-hexane/*i*-PrOH 98:2, flow rate 1.00 mL/min, 254 nm;  $t_{\text{major}} = 37.6$  min,  $t_{\text{minor}} = 46.0$  min (95% ee);  $^1\text{H-NMR}$  (300 MHz,  $\text{CDCl}_3$ ):  $\delta$  0.12 (s, 6H), 0.92 (s, 9H), 4.47 (s, 2H), 4.92-5.13 (m, 2H), 5.21-5.30 (m, 1H), 6.22-6.30 (m, 1H), 6.31-6.39 (m, 1H), 6.54 (s, 3H), 7.38 (s, 1H).  $^{13}\text{C-NMR}$  (75 MHz,  $\text{CDCl}_3$ ):  $\delta$  -5.5, 18.2, 25.7, 29.7, 37.1, 61.3, 73.4, 108.4, 108.6, 110.7, 142.9, 143.7, 147.5, 167.8, 174.1. IR (KBr):  $\nu$  3250, 2958, 2931, 2855, 1652, 1630, 1590, 1554, 1458, 1375, 1254, 1220, 1083, 1011, 842, 782, 734, 682  $\text{cm}^{-1}$ . HRMS (ESI) calcd for  $\text{C}_{18}\text{H}_{26}\text{O}_7\text{NSi}$ : 396.1473, found: 396.1487.

**(*R*)-6-((*tert*-Butyldimethylsilyloxy)methyl)-3-hydroxy-2-(2-nitro-1-(thiophen-2-yl)ethyl)-4*H*-pyran-4-one (3s).<sup>(6)</sup>**

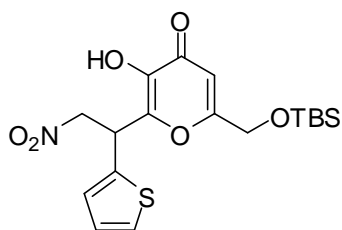

Brown solid; m.p. 128-130 °C (Lit. m.p. 128-129 °C)<sup>(6)</sup> Yield: 85% (34.97 mg);  $[\alpha]_D^{27} = +76.7$  ( $c = 0.5$ ,  $\text{CHCl}_3$ ). The ee was determined by HPLC using a DaicelChiralcel OJ-H column, n-hexane/i-PrOH 90:10, flow rate 1.00 mL/min, 254 nm;  $t_{\text{major}} = 12.9$  min,  $t_{\text{minor}} = 17.5$  min (92% ee);  $^1\text{H-NMR}$  (300 MHz,  $\text{CDCl}_3$ ):  $\delta$  0.11 (s, 6H), 0.92 (s, 9H), 4.49 (s, 2H), 4.91 (dd,  $J = 6.98, 13.4$  Hz, 2H), 5.07-5.20 (m, 1H), 5.37-5.47 (m, 1H), 6.52 (s, 1H), 6.95-7.01 (m, 1H), 7.03-7.08 (m, 1H), 7.16-7.33 (m, 1H).  $^{13}\text{C-NMR}$  (75 MHz,  $\text{CDCl}_3$ ):  $\delta$  -5.5, 25.7, 38.3, 61.3, 75.8, 108.6, 125.9, 126.7, 127.2, 128.5, 128.9, 129.1, 136.3, 137.4, 141.8, 144.8, 167.7, 174.0. IR (KBr):  $\nu$  3237, 2930, 2856, 1630, 1589, 1552, 1458, 1373, 1253, 1080, 841, 780, 696  $\text{cm}^{-1}$ .

**(S)-6-((tert-Butyldimethylsilyloxy)methyl)-3-hydroxy-2-(1-nitropentan-2-yl)-4H-pyran-4-one (3t).**

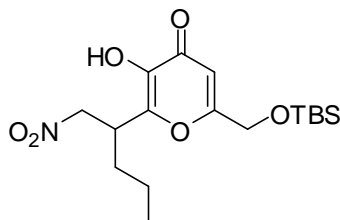

White solid; m.p. 111-113 °C; Yield: 90% (33.49 mg);  $[\alpha]_D^{27} = -96.7$  ( $c = 0.5$ ,  $\text{CHCl}_3$ ). The ee was determined by HPLC using a DaicelChiralcel OJ-H column, n-hexane/i-PrOH 99:01, flow rate 1.00 mL/min, 254 nm;  $t_{\text{minor}} = 33.0$  min,  $t_{\text{major}} = 36.8$  min (89% ee);  $^1\text{H-NMR}$  (300 MHz,  $\text{CDCl}_3$ ):  $\delta$  0.12 (s, 6H), 0.83-1.01 (m, 12H), 1.21-1.42 (m, 2H), 1.53-1.86 (m, 2H), 3.78-3.92 (m, 1H), 4.48 (s, 2H), 4.58 (dd,  $J = 6.20, 12.8$  Hz, 1H), 4.69-4.81 (m, 1H), 6.52 (s, 1H).  $^{13}\text{C-NMR}$  (125 MHz,  $\text{CDCl}_3$ ):  $\delta$  -5.5, 13.6, 18.2, 19.9, 25.6, 31.6, 37.7, 61.3, 75.9, 108.4, 142.9, 146.9, 167.4, 174.0. IR (KBr):  $\nu$  3256, 2957, 2933, 2860, 1660, 1628, 1592, 1552, 1464, 1322, 1230, 1135, 844, 781, 678  $\text{cm}^{-1}$ . HRMS (ESI) calcd for  $\text{C}_{17}\text{H}_{30}\text{O}_6\text{NSi}$ : 372.1836, found: 372.1836.

**(R)-3-Hydroxy-6-methyl-2-(2-nitro-1-phenylethyl)-4H-pyran-4-one (5a).**

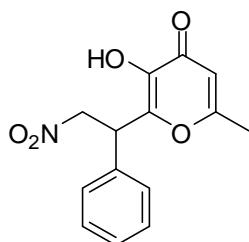

Brown solid; m.p. 120-122°C; Yield: 96% (26.50 mg);  $[\alpha]_D^{27} = +36.6$  ( $c = 0.5$ ,  $\text{CHCl}_3$ ). The ee was determined by HPLC using a DaicelChiralcel OJ-H column, n-hexane/i-PrOH 90:10, flow rate 1.00 mL/min, 254 nm;  $t_{\text{major}} = 21.7$  min,  $t_{\text{minor}} = 44.5$  min (95% ee);  $^1\text{H-NMR}$  (400 MHz,  $\text{CDCl}_3$ ):  $\delta$  2.30 (s, 3H), 4.91 (dd,  $J = 6.7, 13.4$  Hz, 1H), 5.05-5.27 (m, 2H), 6.24 (s, 1H), 7.28-7.48 (m, 5H).  $^{13}\text{C-NMR}$  (75 MHz,  $\text{CDCl}_3$ ):  $\delta$  20.0, 29.2, 43.1, 75.5, 110.6, 127.8, 128.4, 129.2, 135.5, 142.6, 146.7, 160.4, 165.5, 174.6. IR (KBr):  $\nu$  3213, 2923, 1650, 1625, 1559, 1451, 1376, 1335, 1207, 952, 863, 769, 703  $\text{cm}^{-1}$ . HRMS (ESI) calcd for  $\text{C}_{14}\text{H}_{14}\text{O}_5\text{N}$ : 276.0866, found: 276.0870.

**(R)-6-((4-Chlorophenylthio)methyl)-3-hydroxy-2-(2-nitro-1-phenylethyl)-4H-pyran-4-one (5b).**

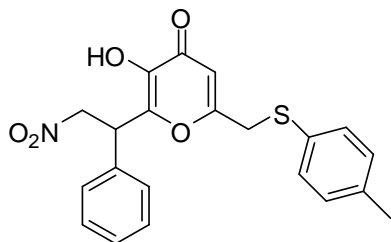

Semi solid; Yield: 95% (39.71 mg);  $[\alpha]_D^{27} = +22.7$  ( $c = 0.5$ ,  $\text{CHCl}_3$ ). The ee was determined by HPLC using a DaicelChiralcel OJ-H column, n-hexane/i-PrOH 70:30, flow rate 1.00 mL/min, 254 nm;  $t_{\text{major}} = 36.4$  min,  $t_{\text{minor}} = 56.8$  min (97% ee);  $^1\text{H-NMR}$  (500 MHz,  $\text{CDCl}_3$ ):  $\delta$  3.83 (s, 2H), 4.83 ( $J = 6.1, 13.3$  Hz, 1H), 5.01-5.07 (m, 1H), 5.08-5.16 (m, 1H), 6.15 (s, 1H), 7.16-7.40 (m, 10H).  $^{13}\text{C-NMR}$  (75 MHz,  $\text{CDCl}_3$ ):  $\delta$  25.3, 29.6, 37.4, 42.9, 75.1, 111.2, 127.7, 128.5, 129.3, 129.5, 131.5, 133.1, 134.4, 135.1, 142.0, 146.8, 163.7, 173.5. IR (KBr):  $\nu$  3240, 2924, 2853, 1624, 1554, 1475, 1450, 1375, 1335, 1209, 1094, 1011, 818, 700  $\text{cm}^{-1}$ . HRMS (ESI) calcd for  $\text{C}_{20}\text{H}_{17}\text{O}_5\text{NClS}$ : 418.0510, found: 418.0525.

## 7. Copy of $^1\text{H}$ NMR and $^{13}\text{C}$ NMR of ligands.

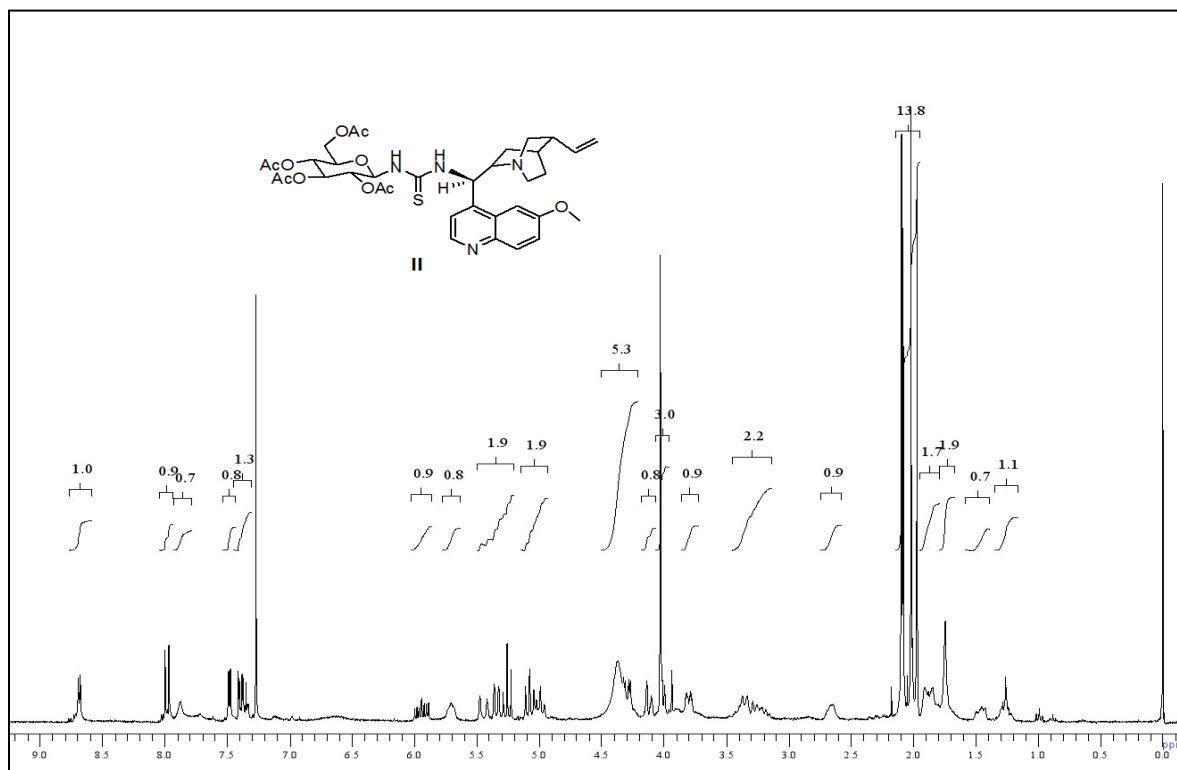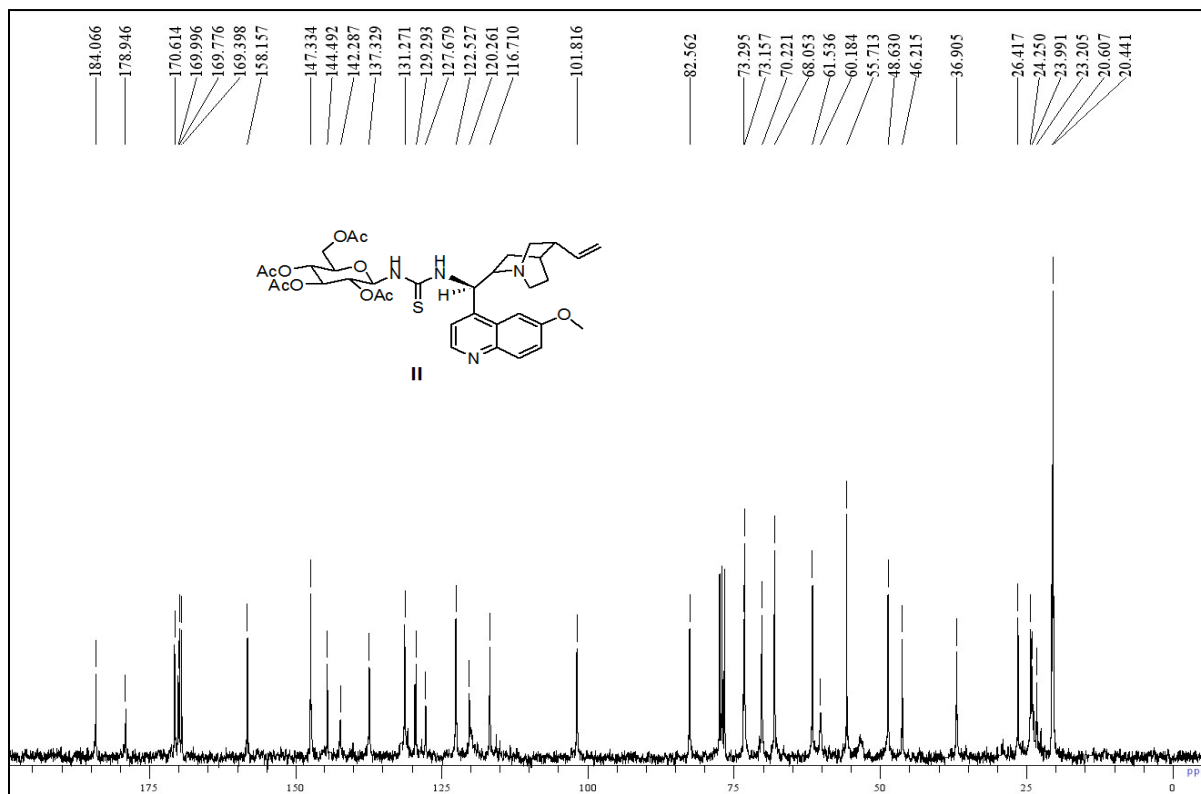

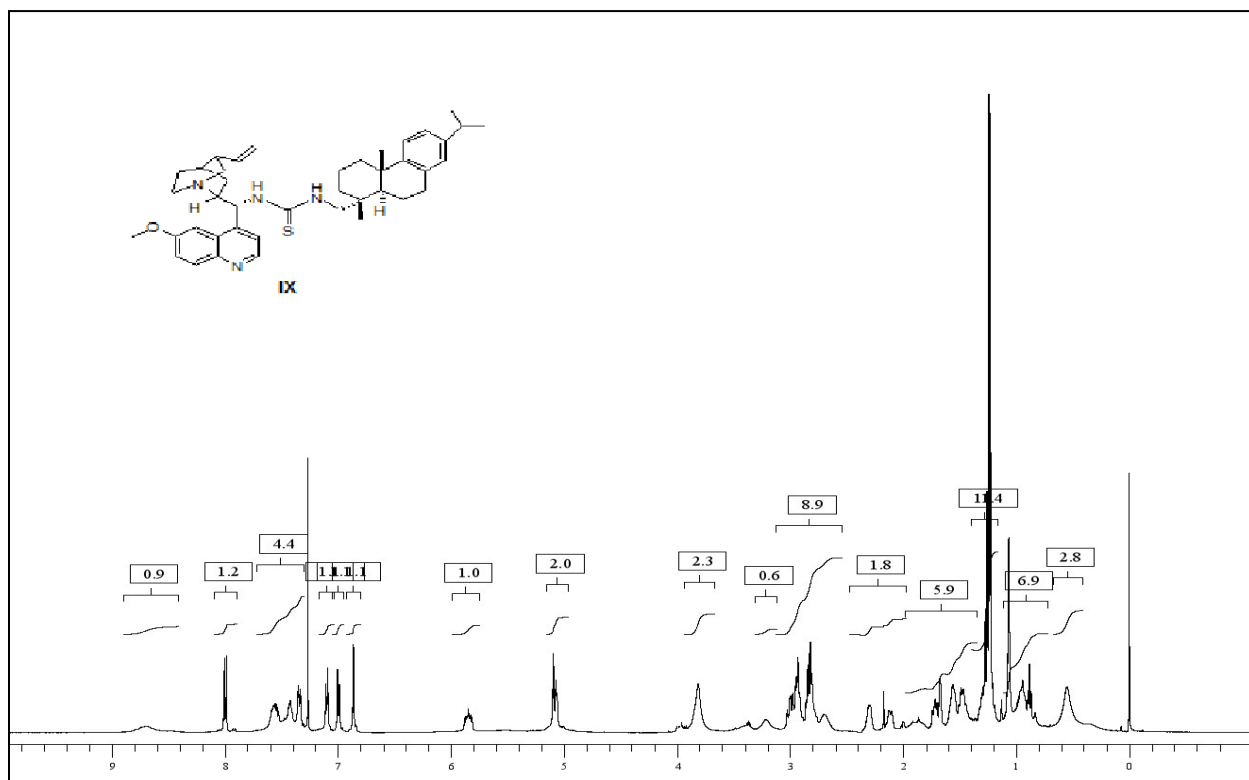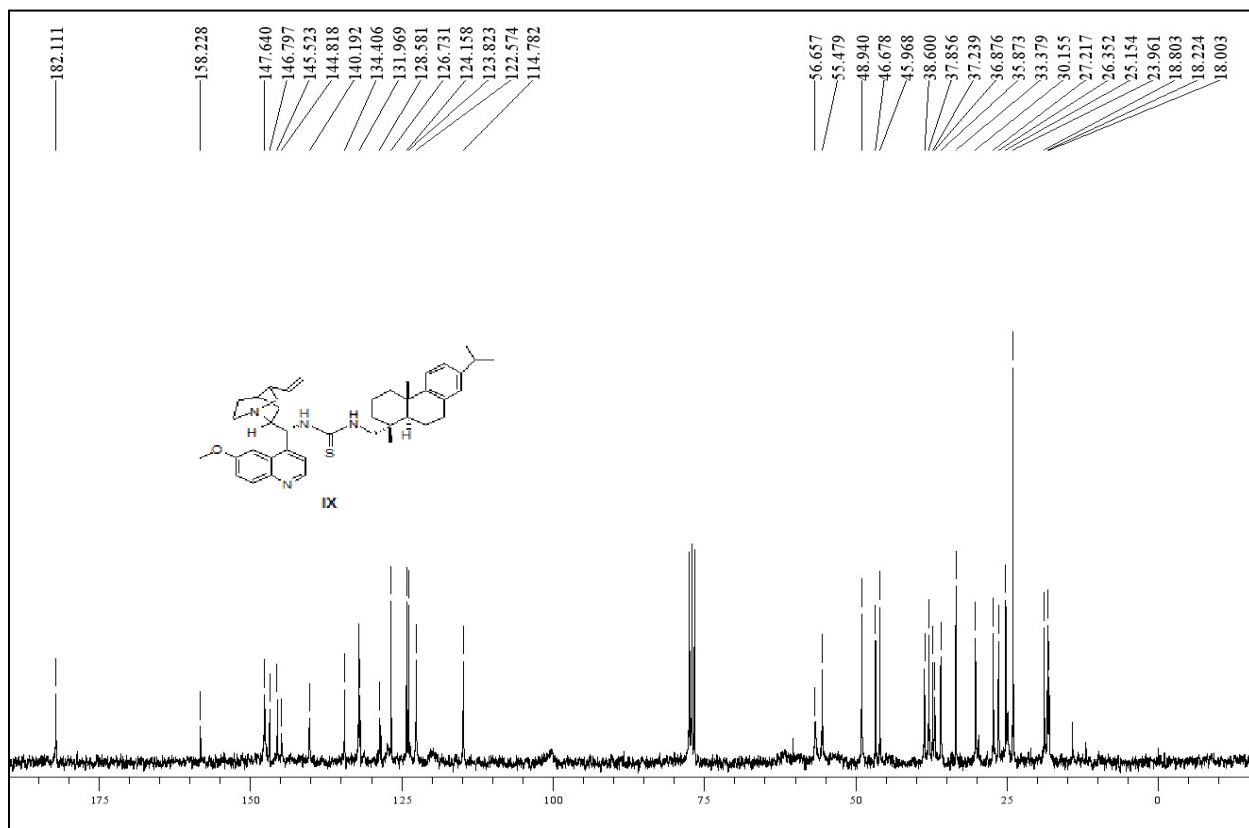

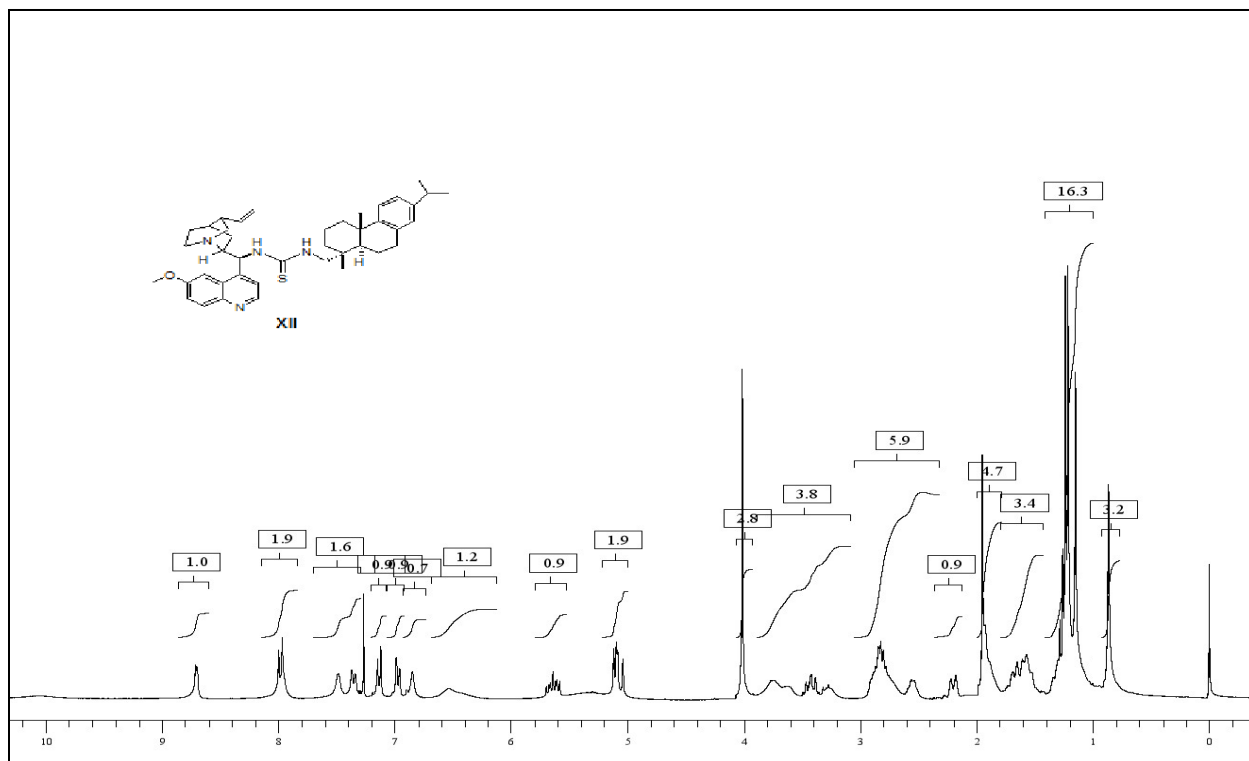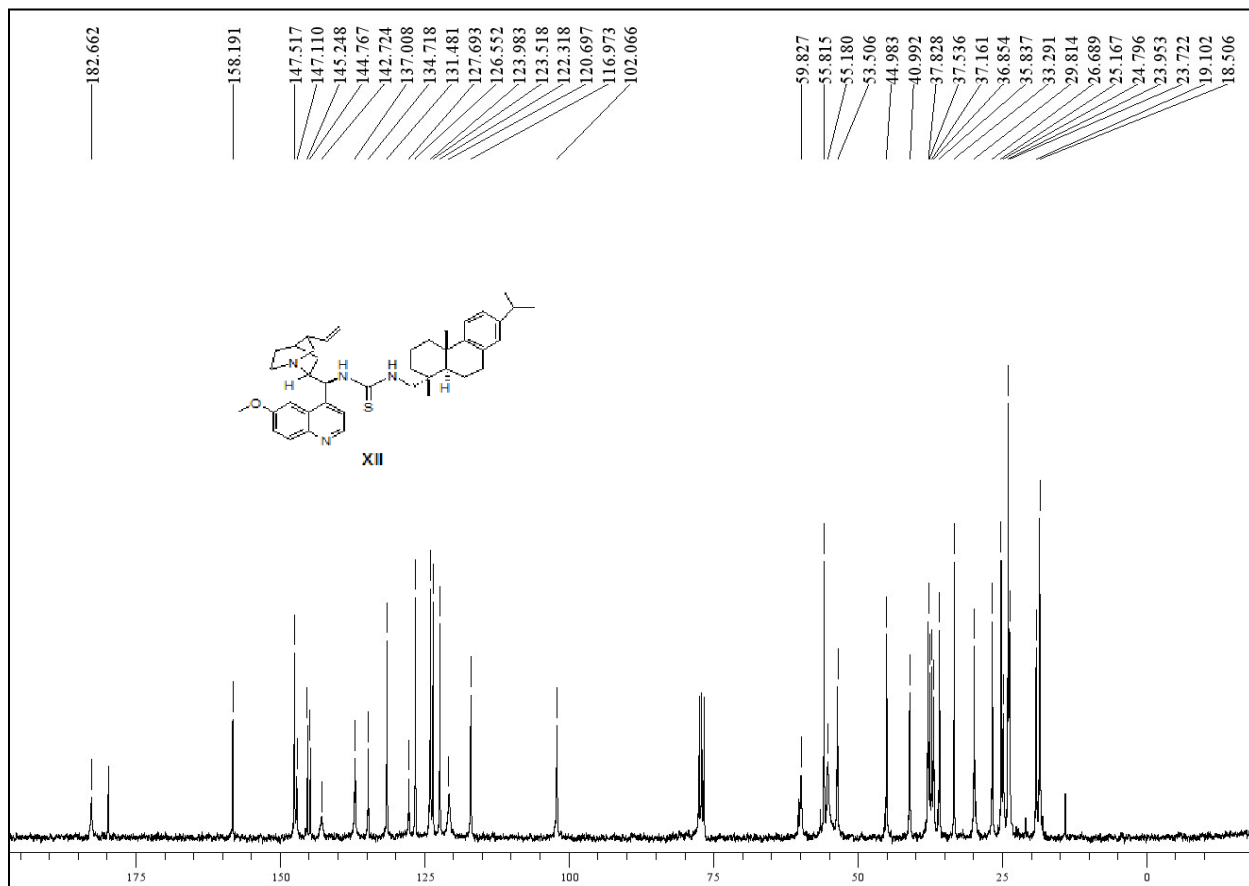

## 8. Copy of $^1\text{H}$ NMR and $^{13}\text{C}$ NMR of all products.

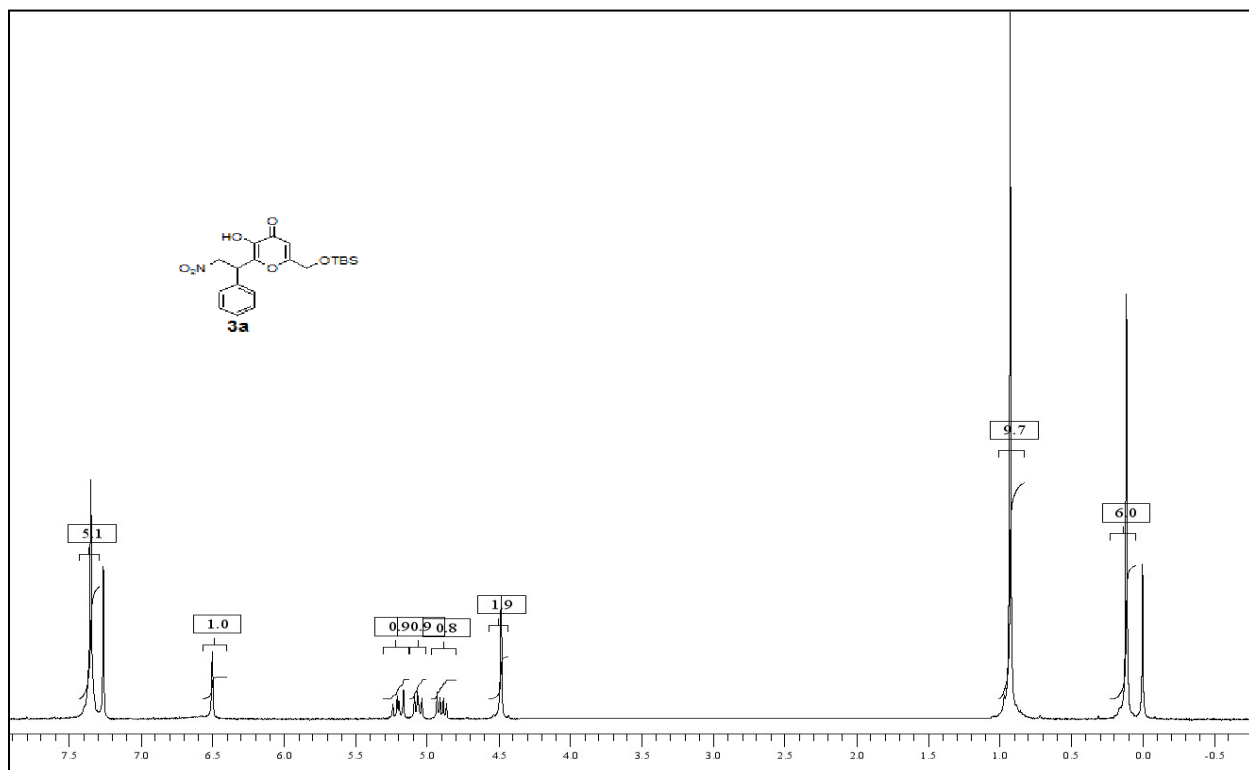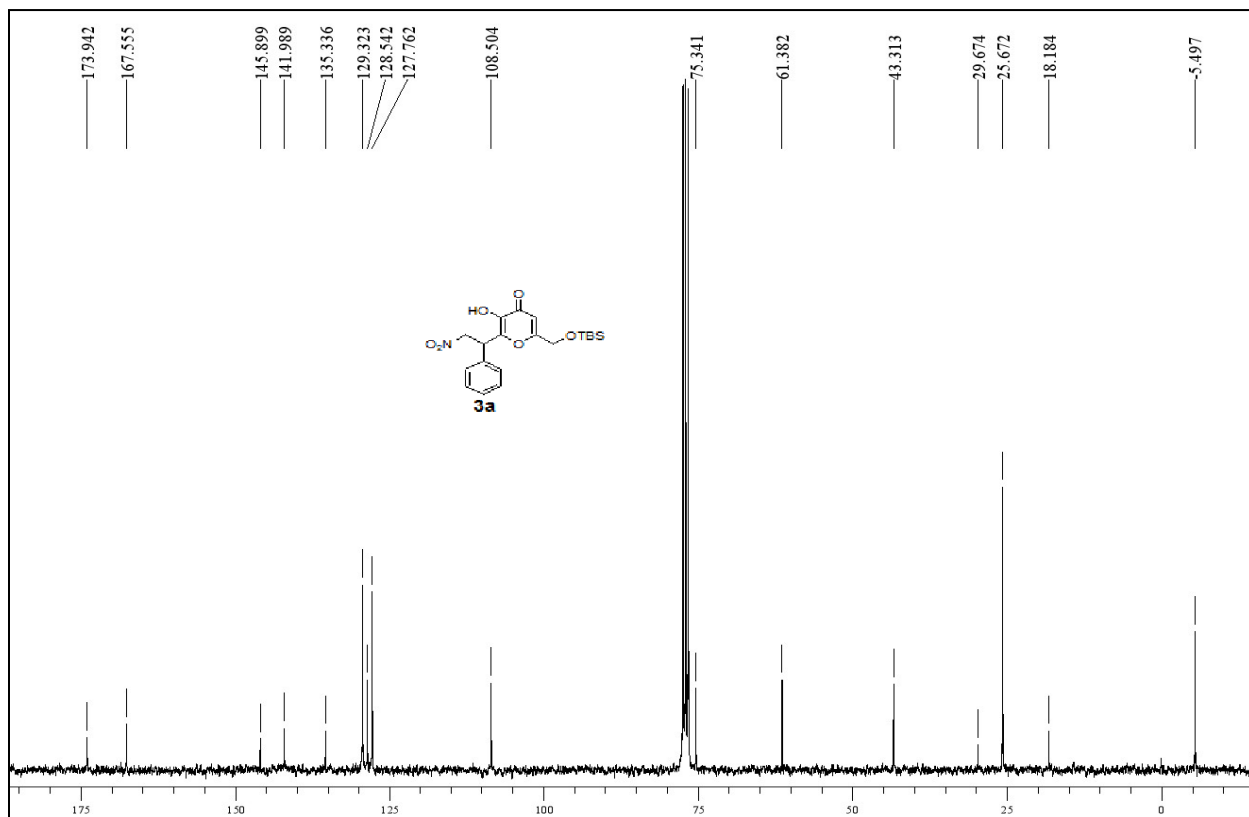

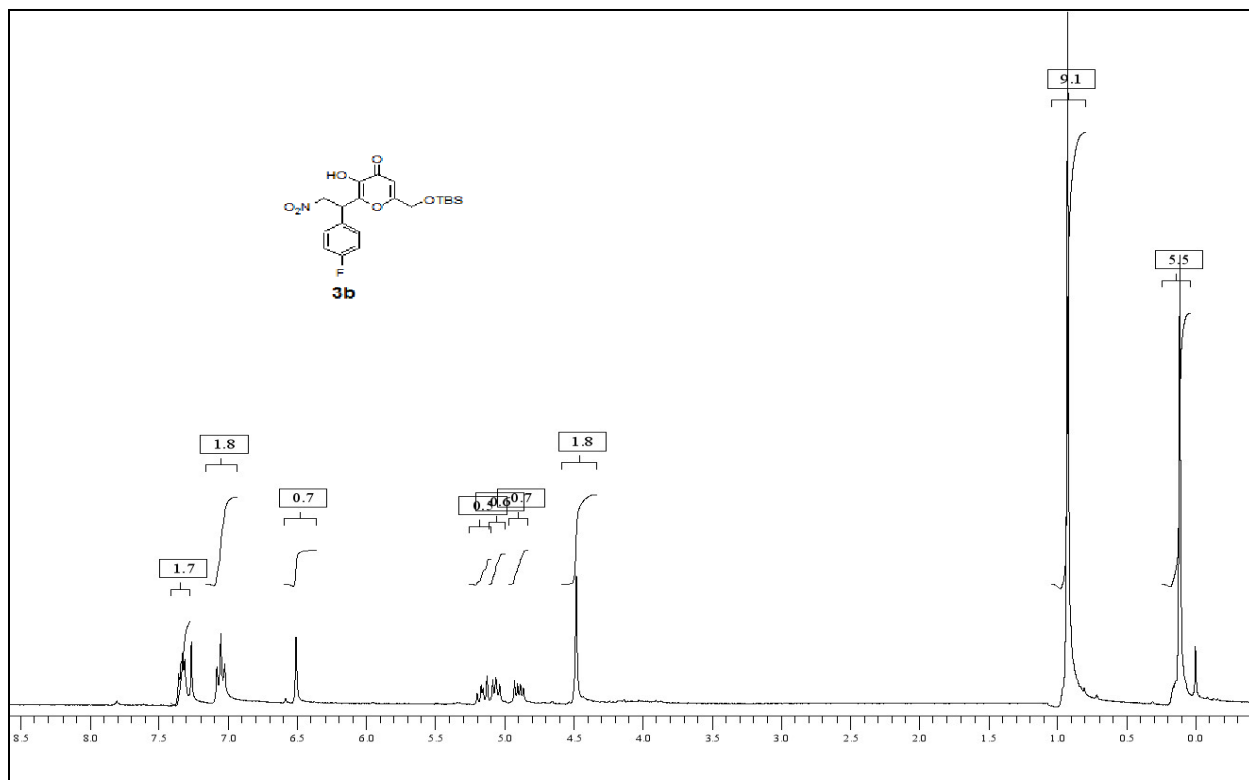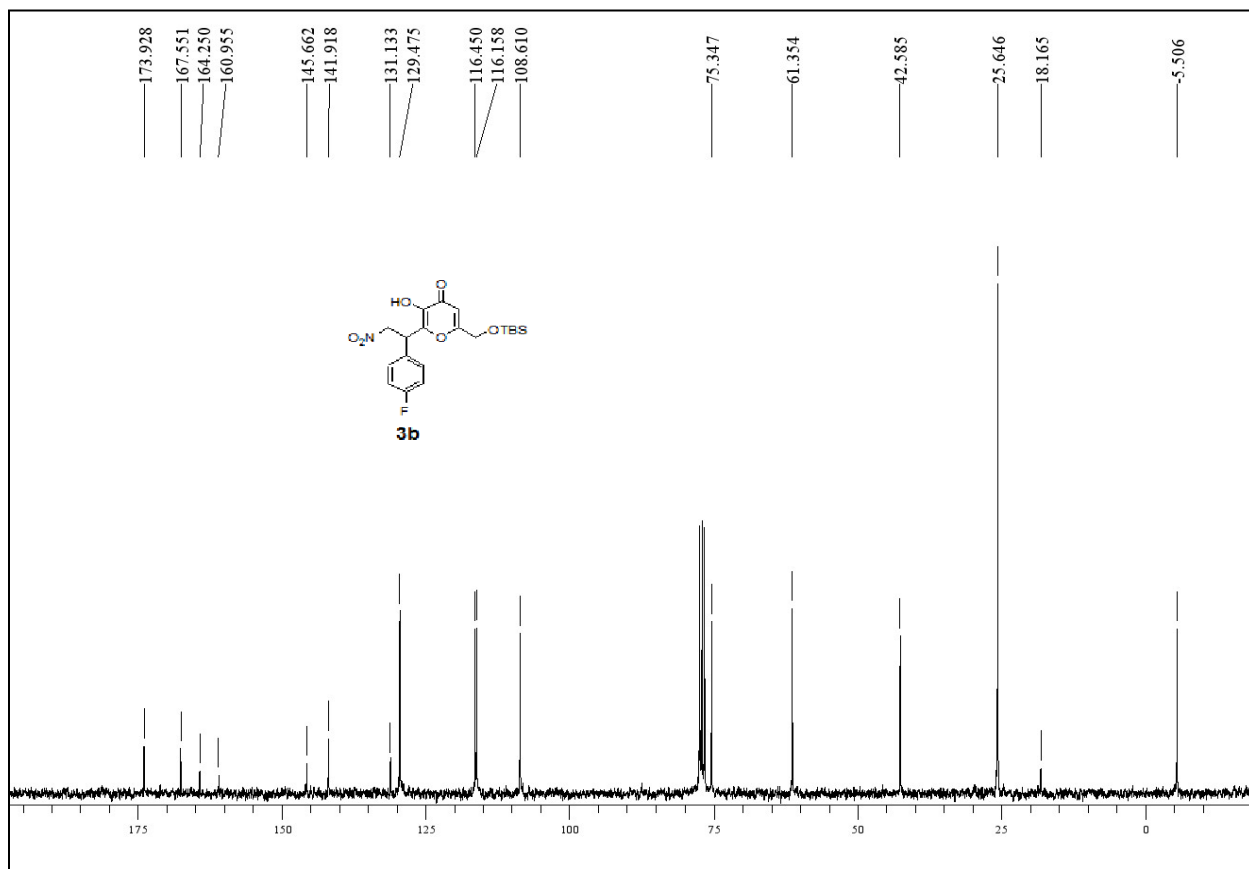



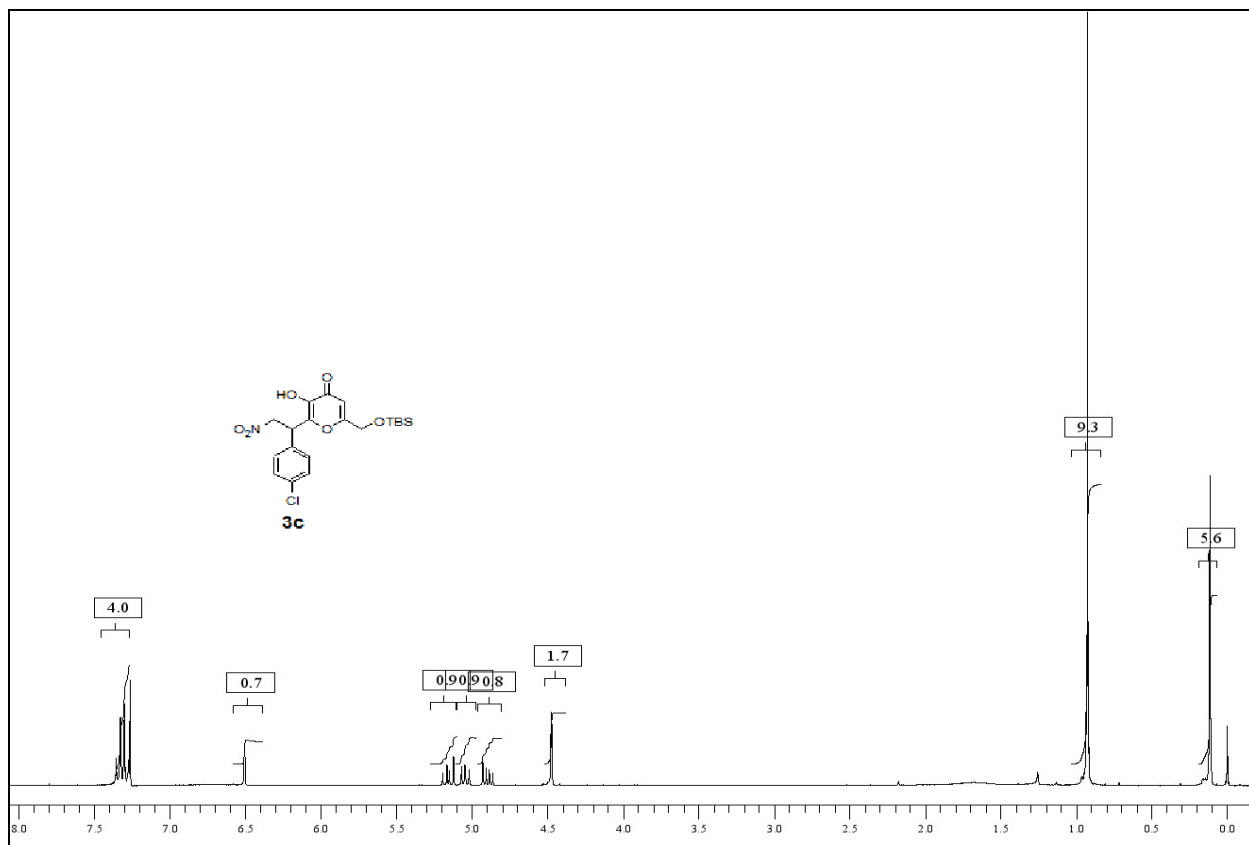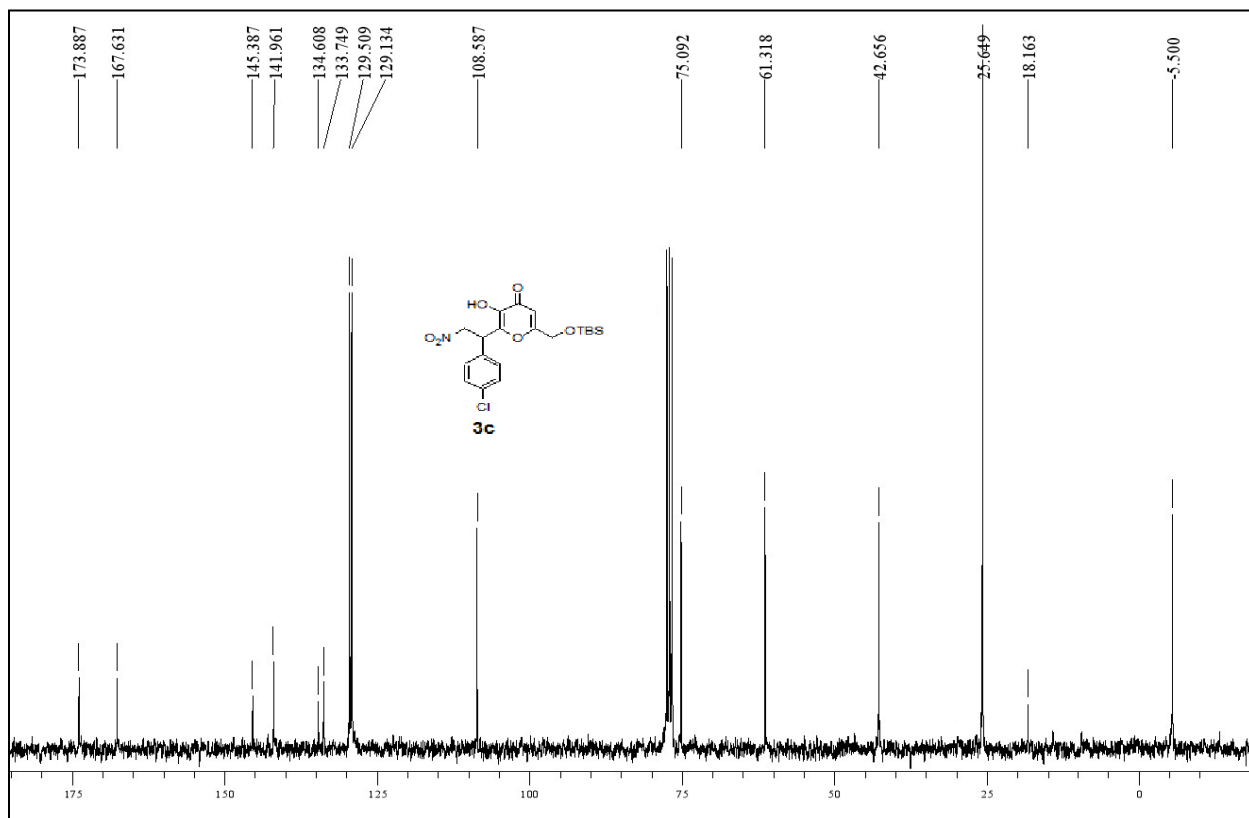

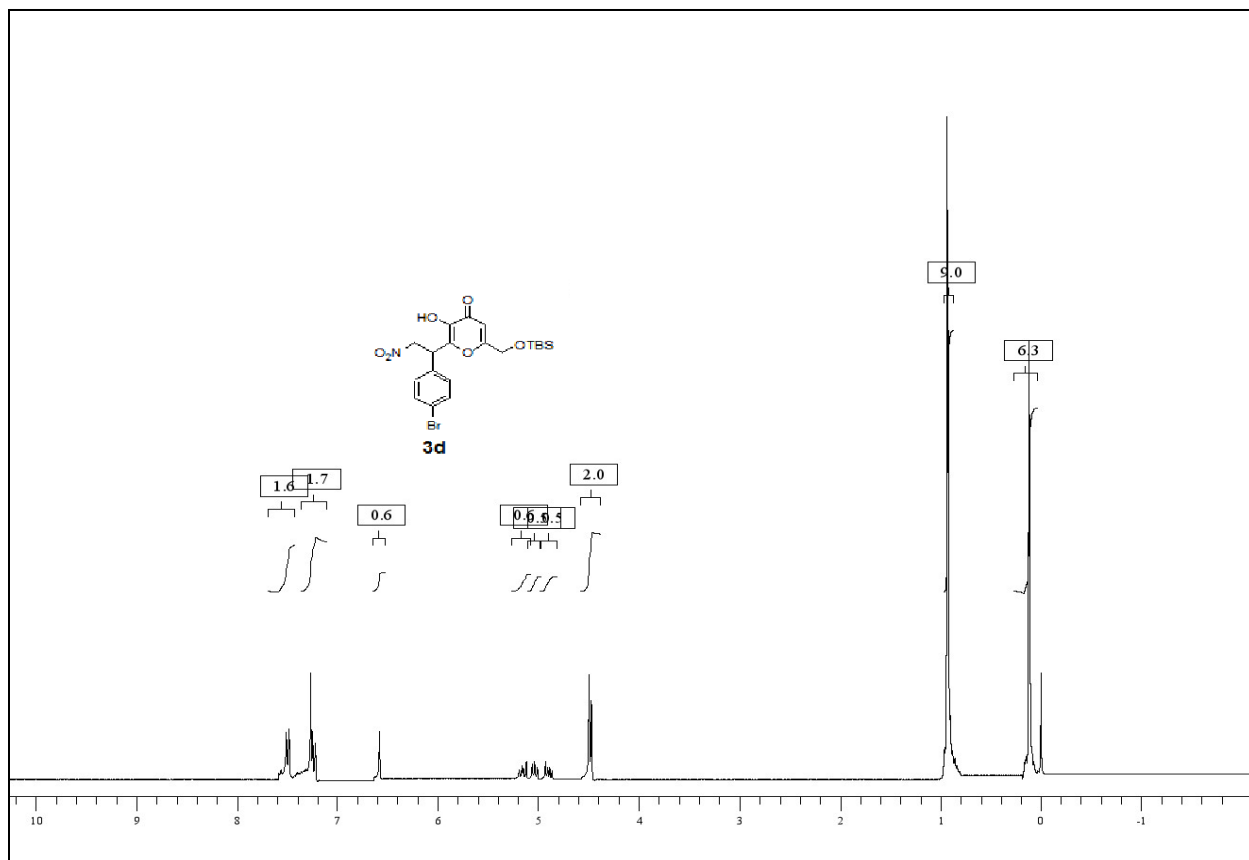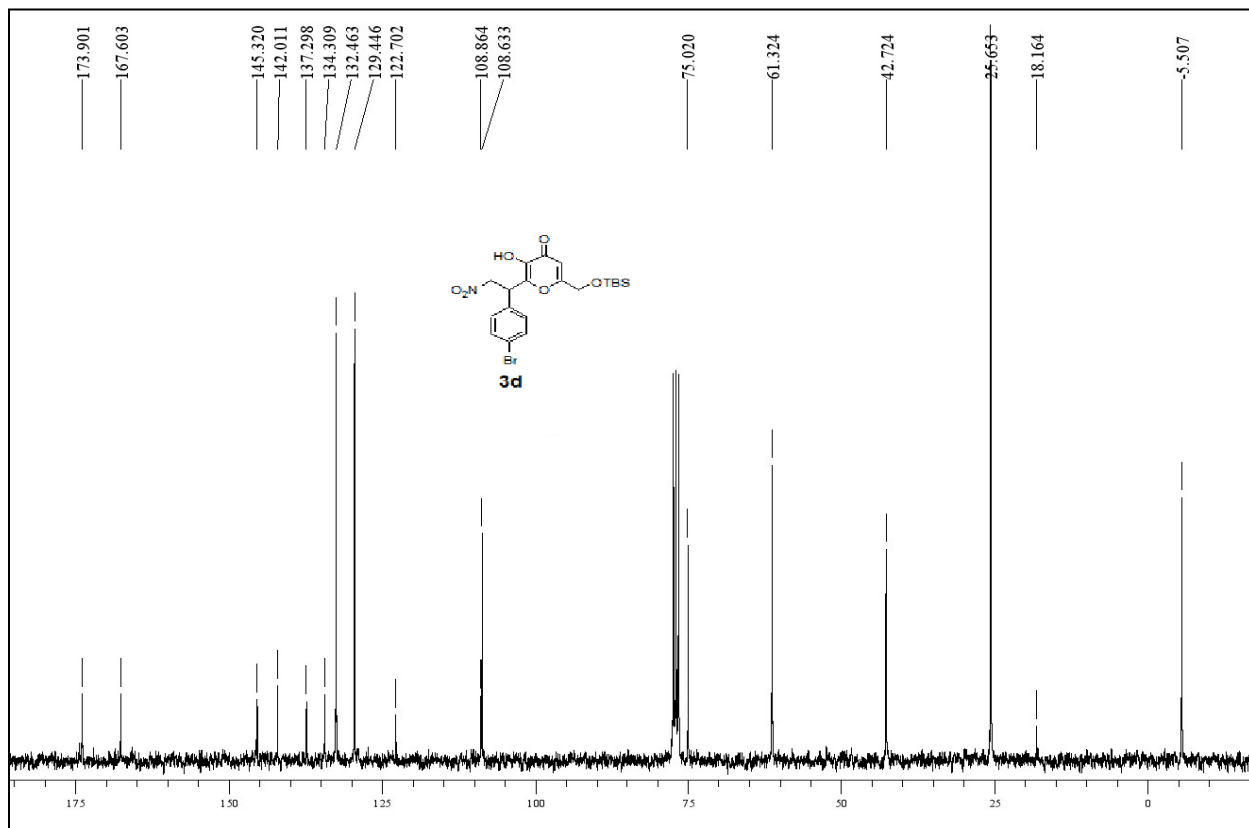

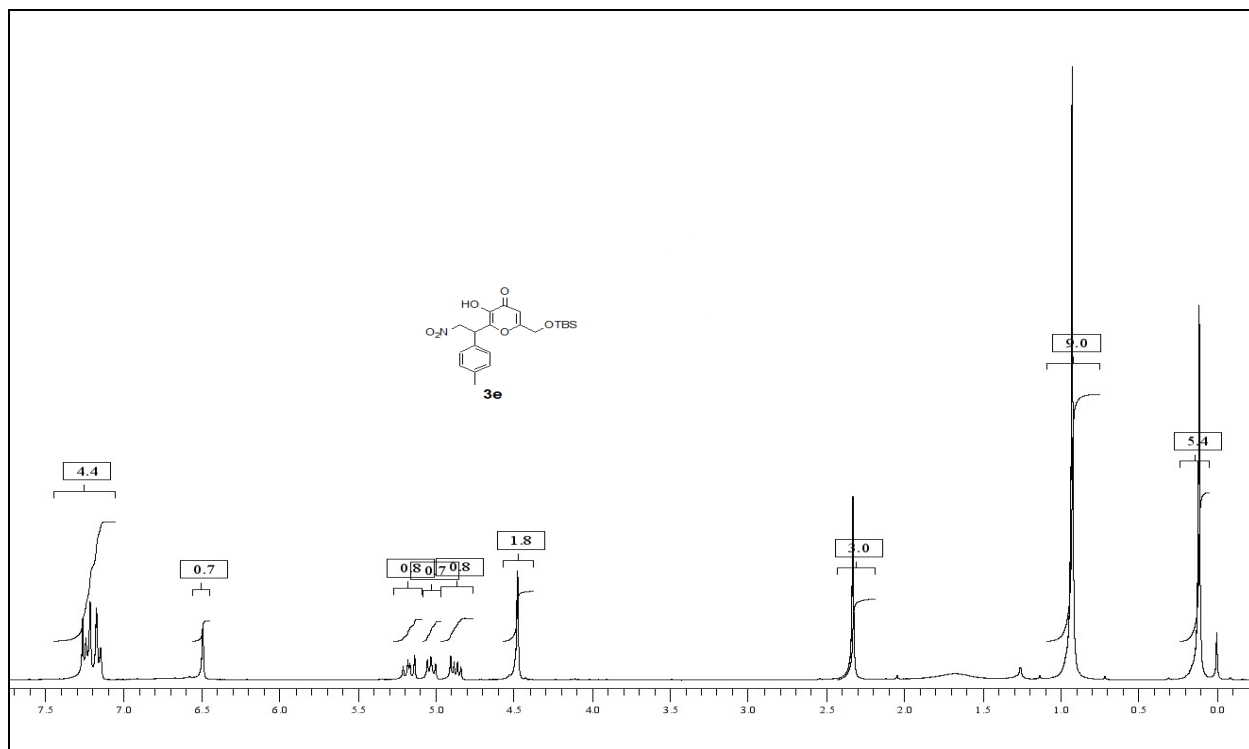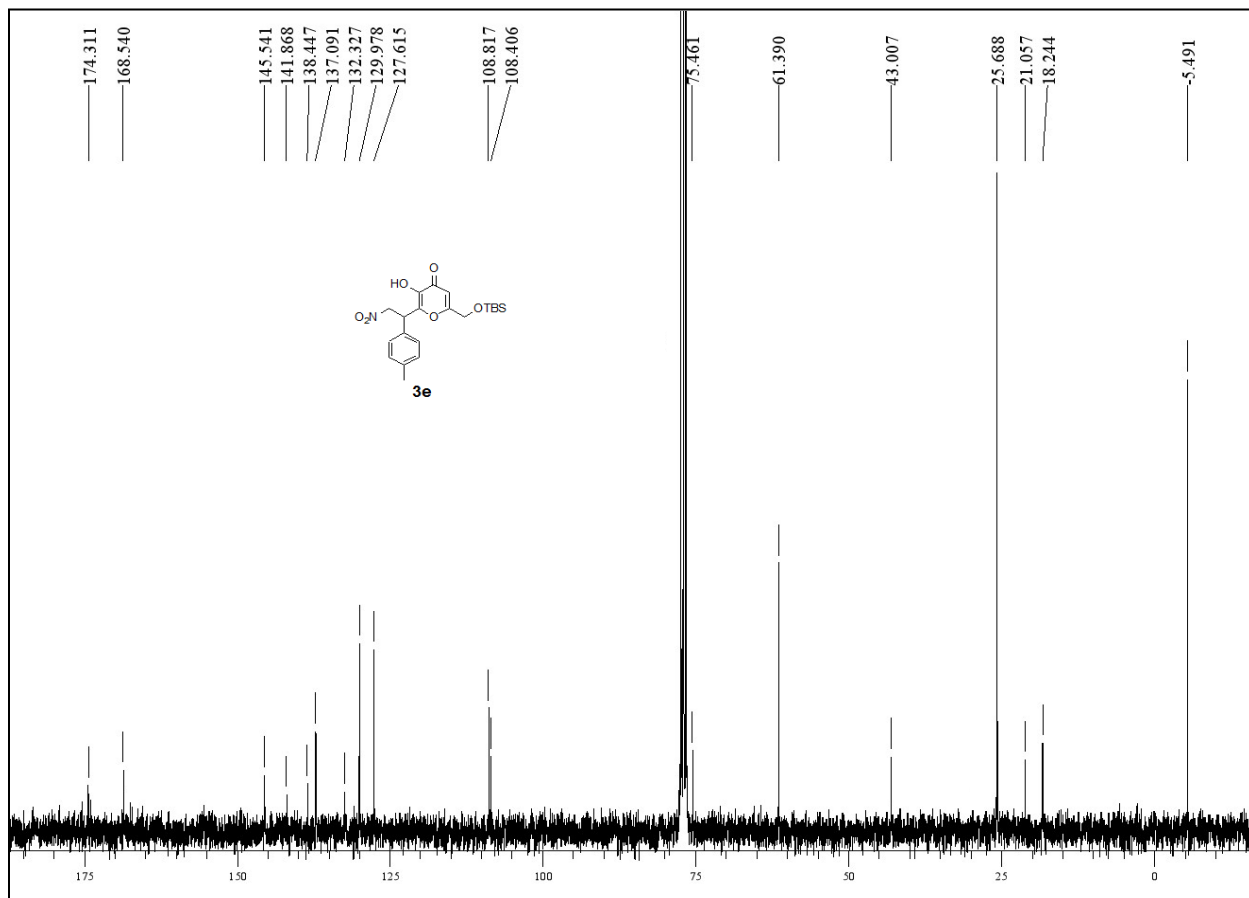

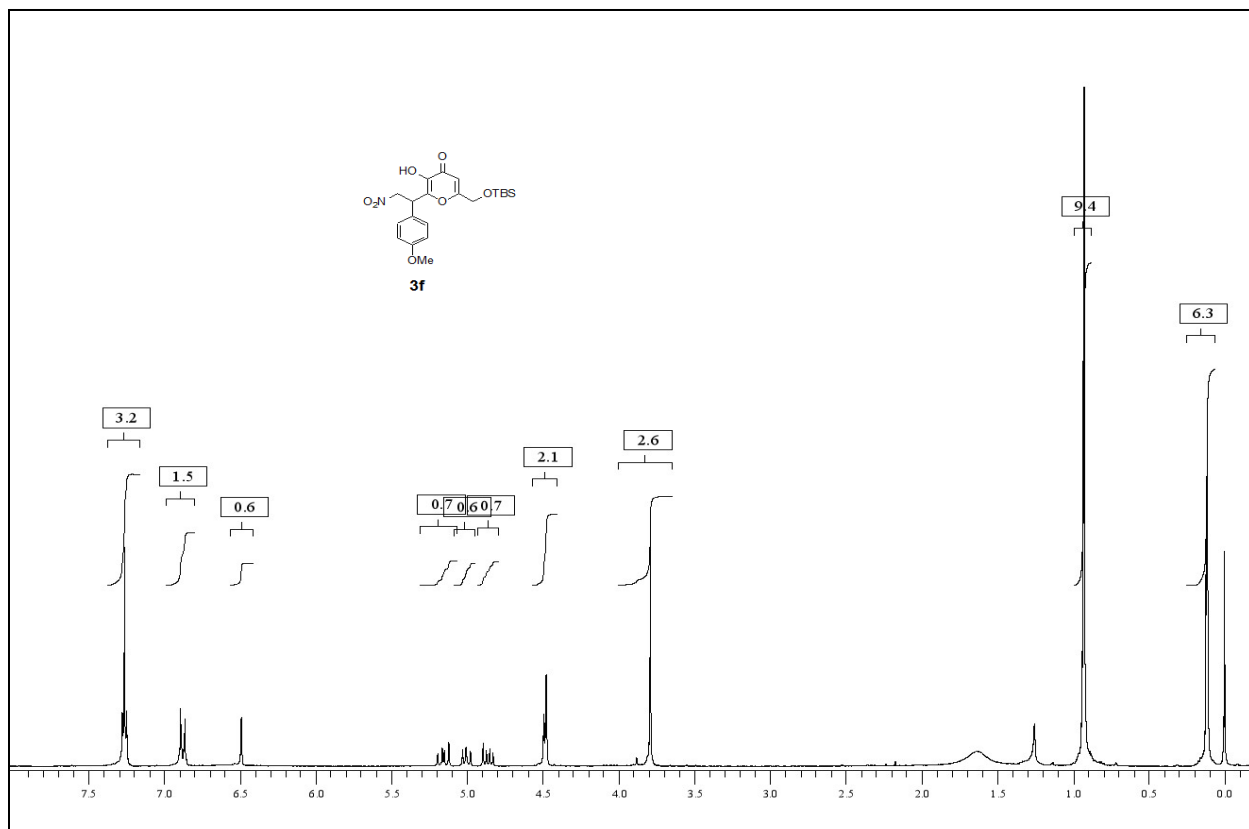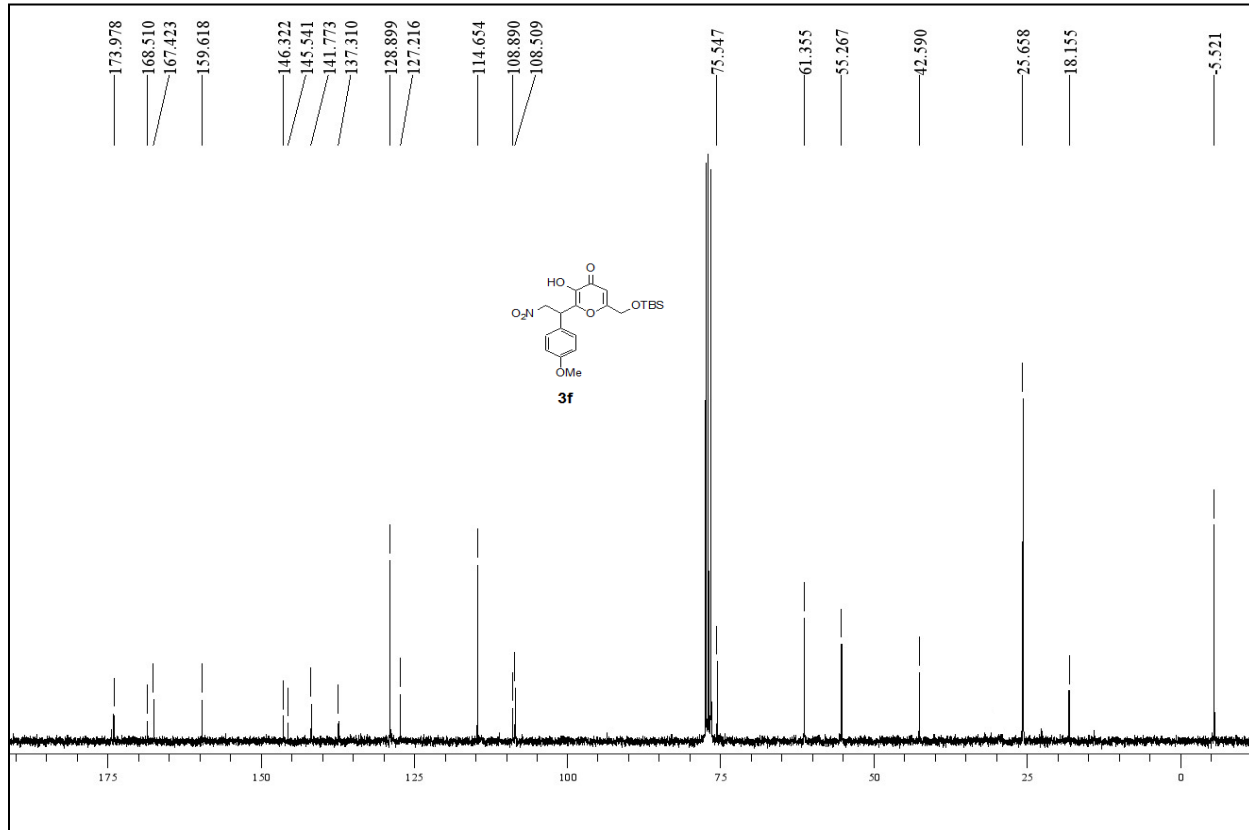

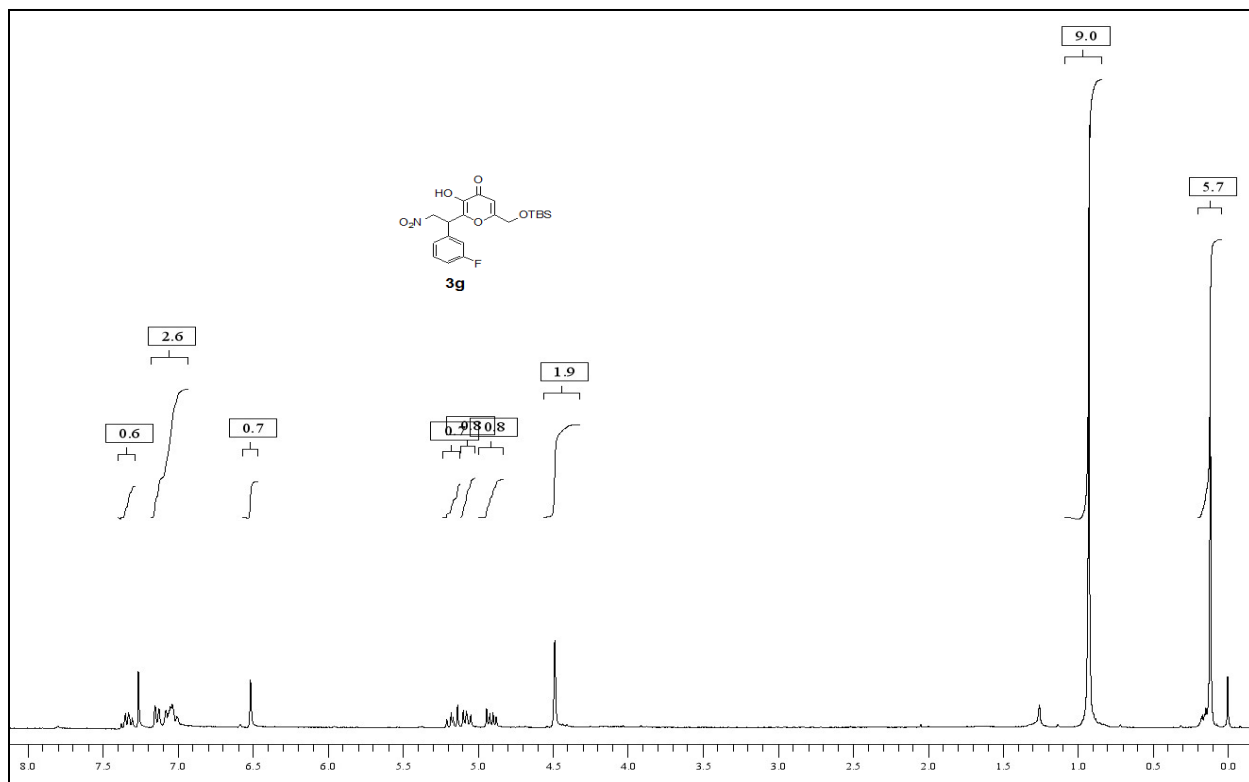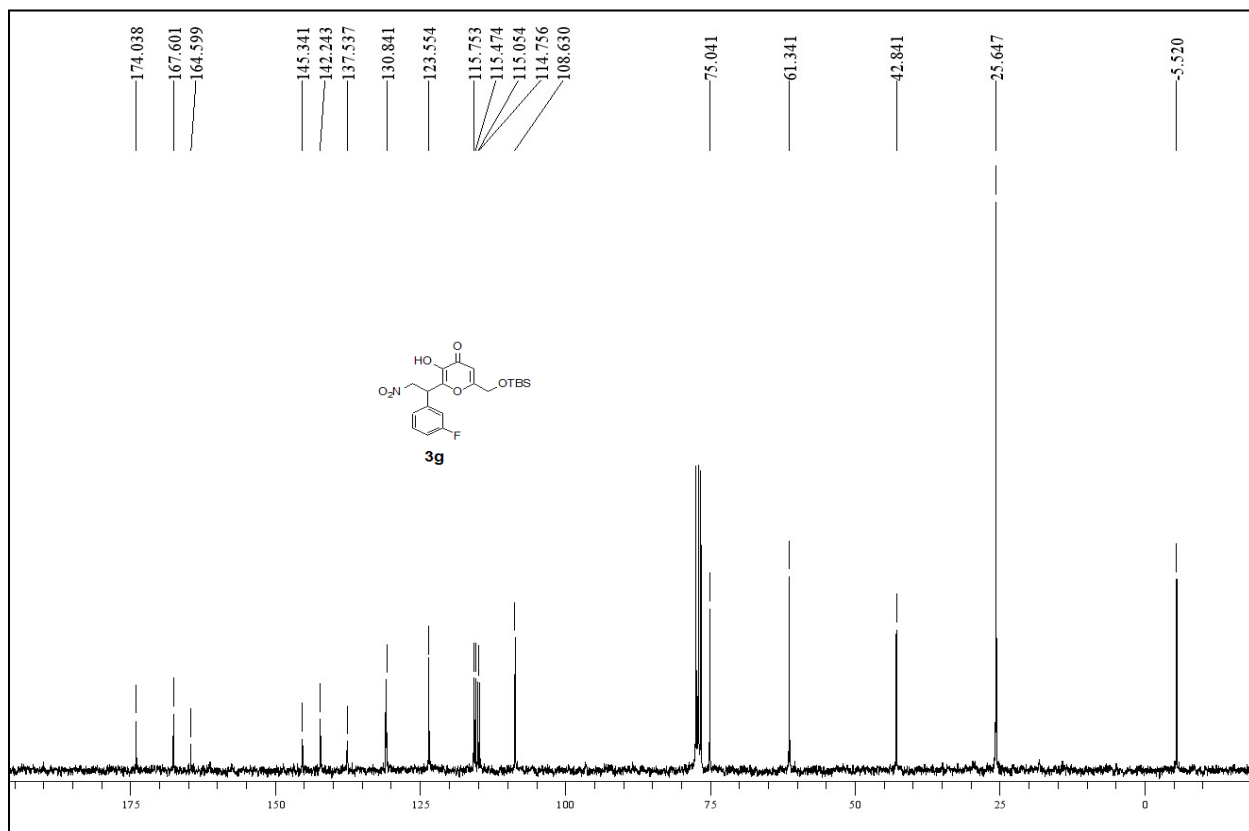

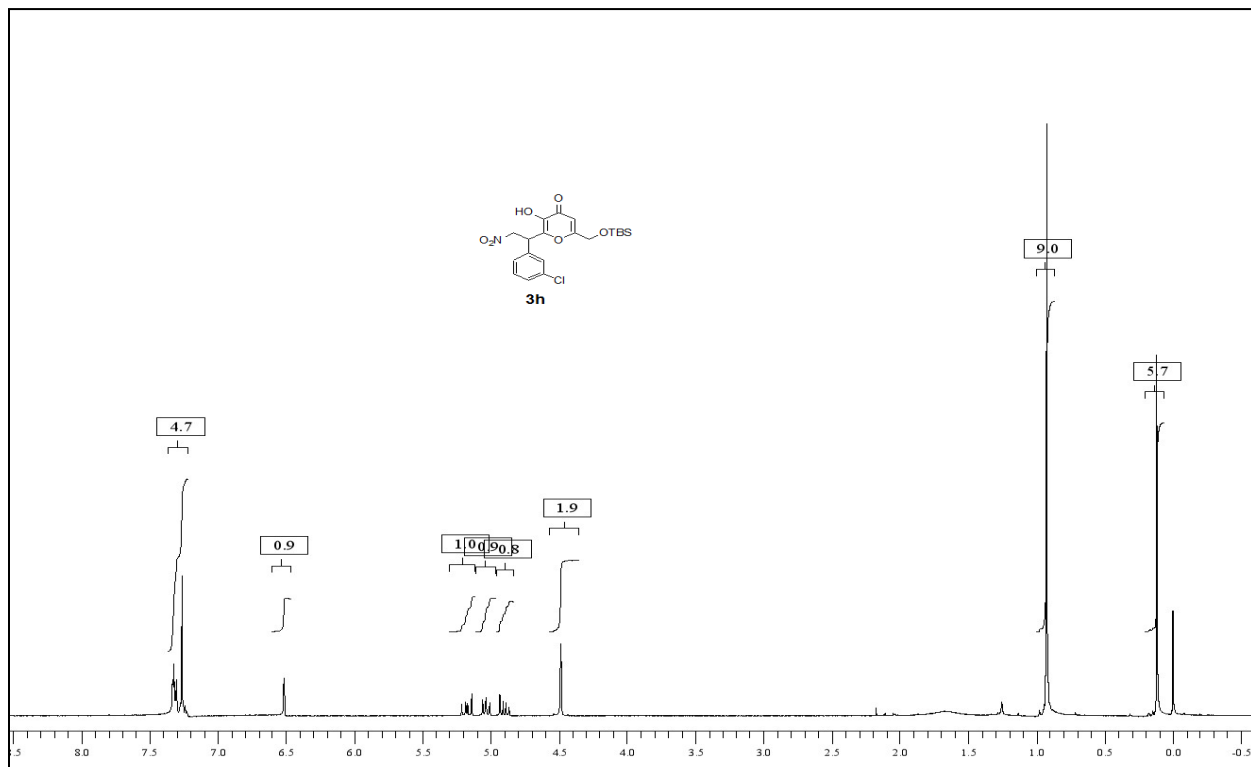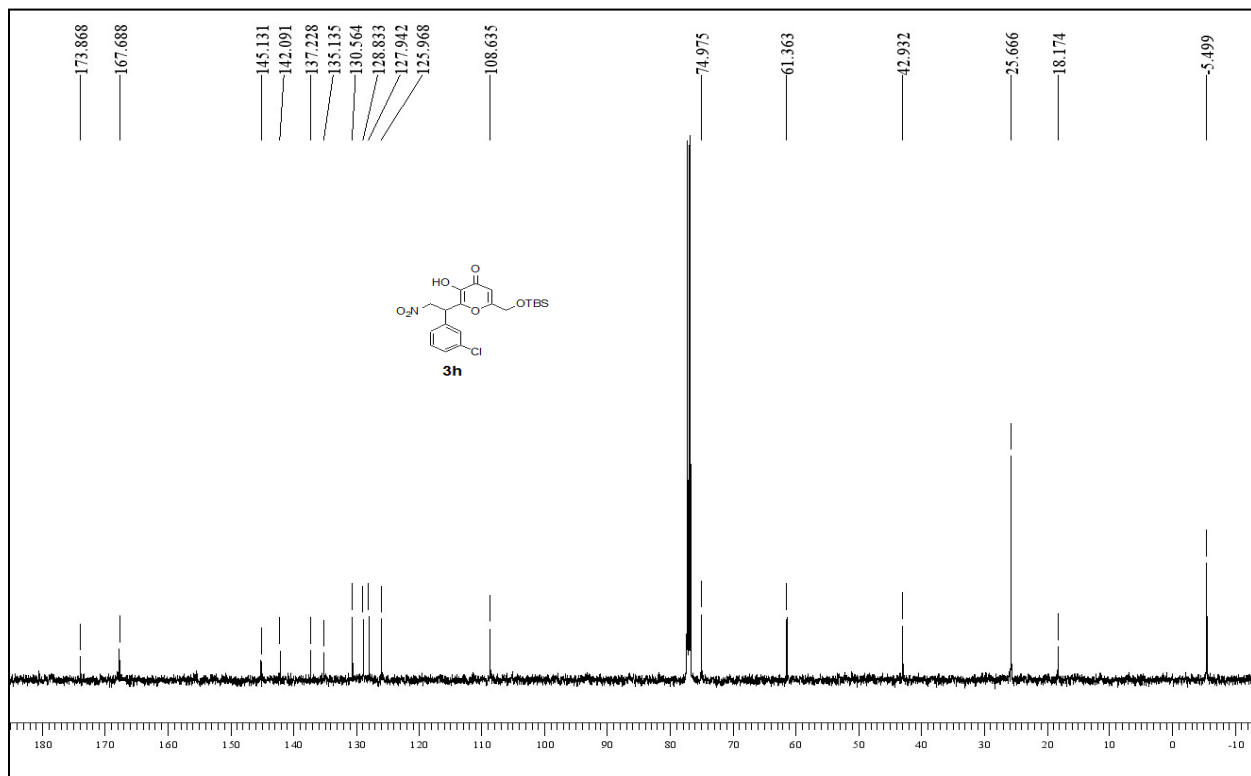

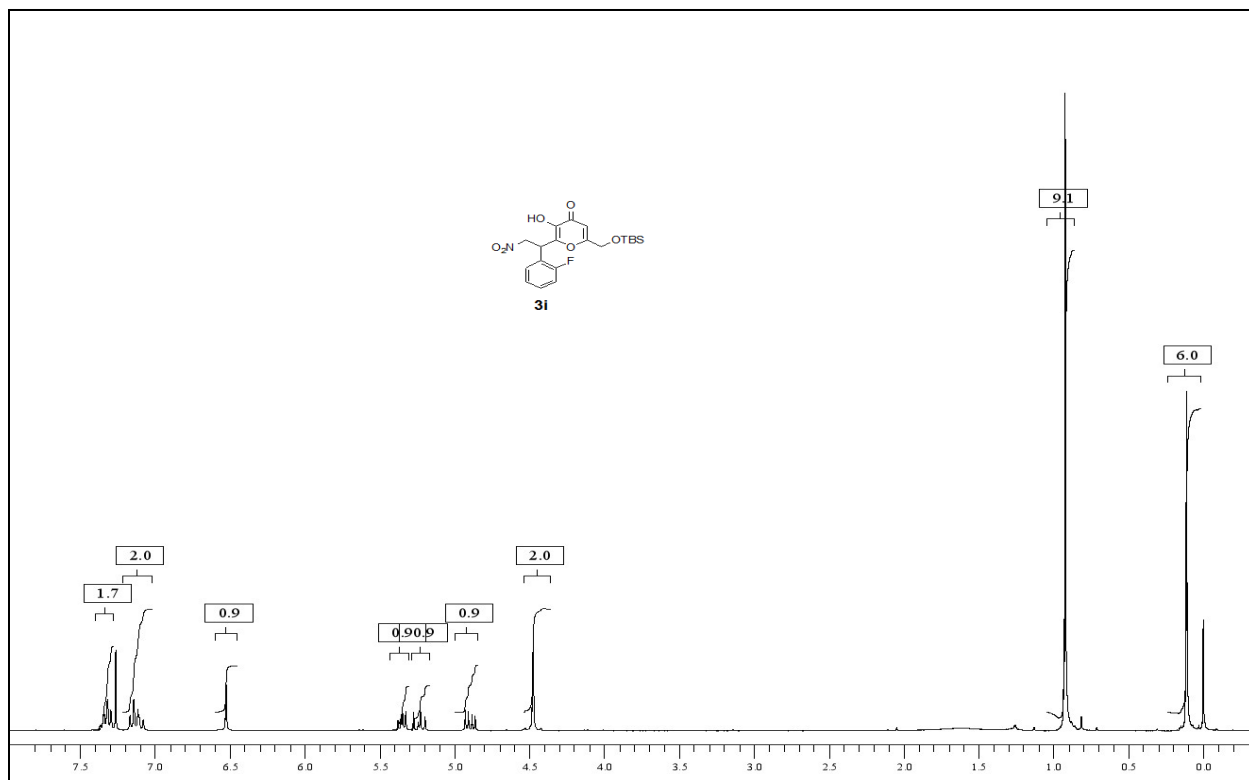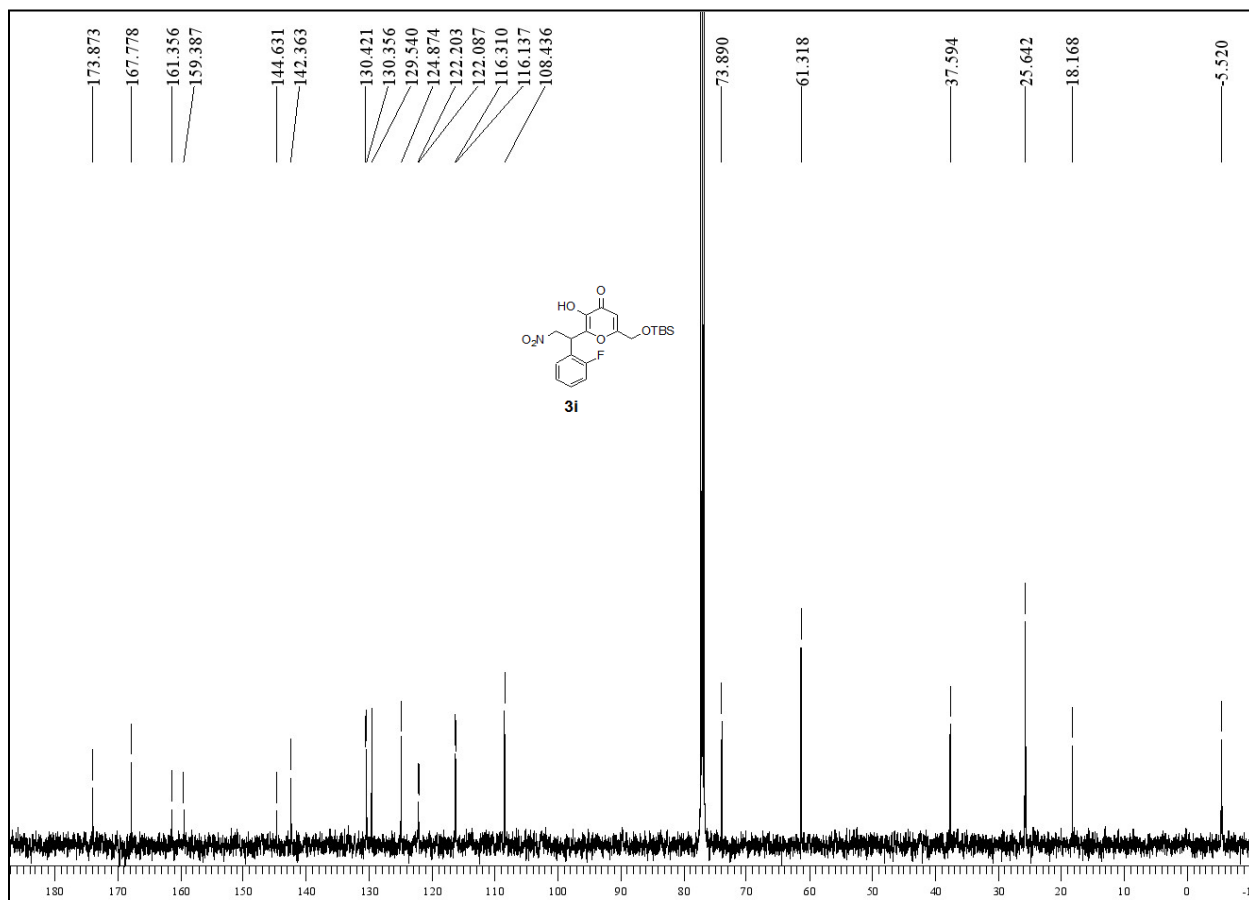

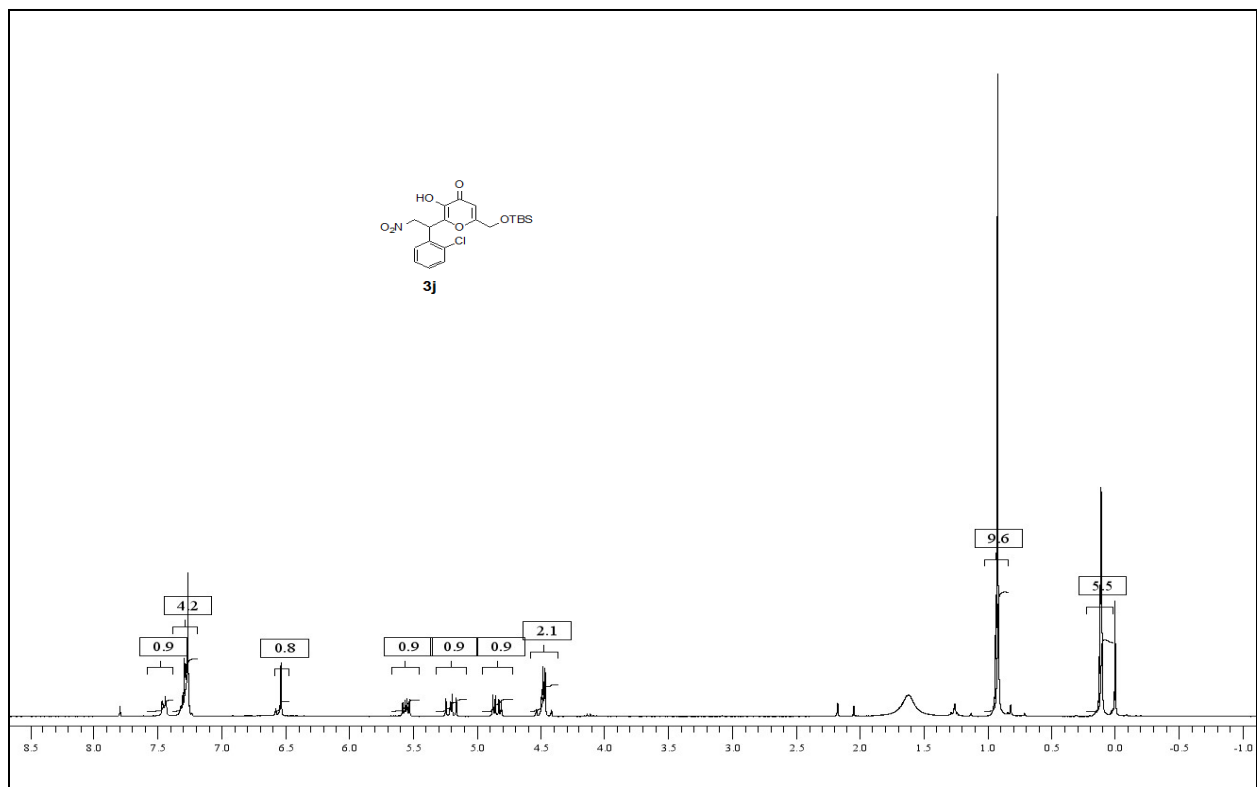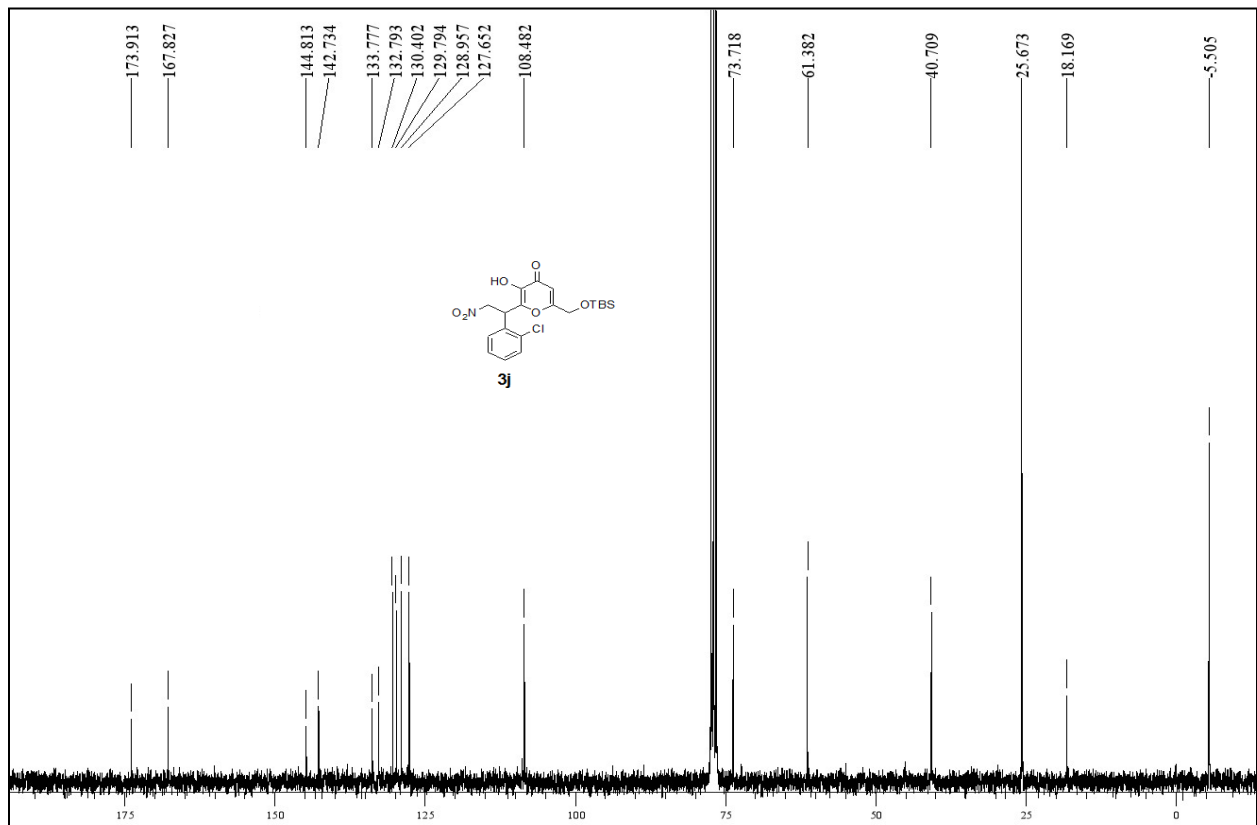



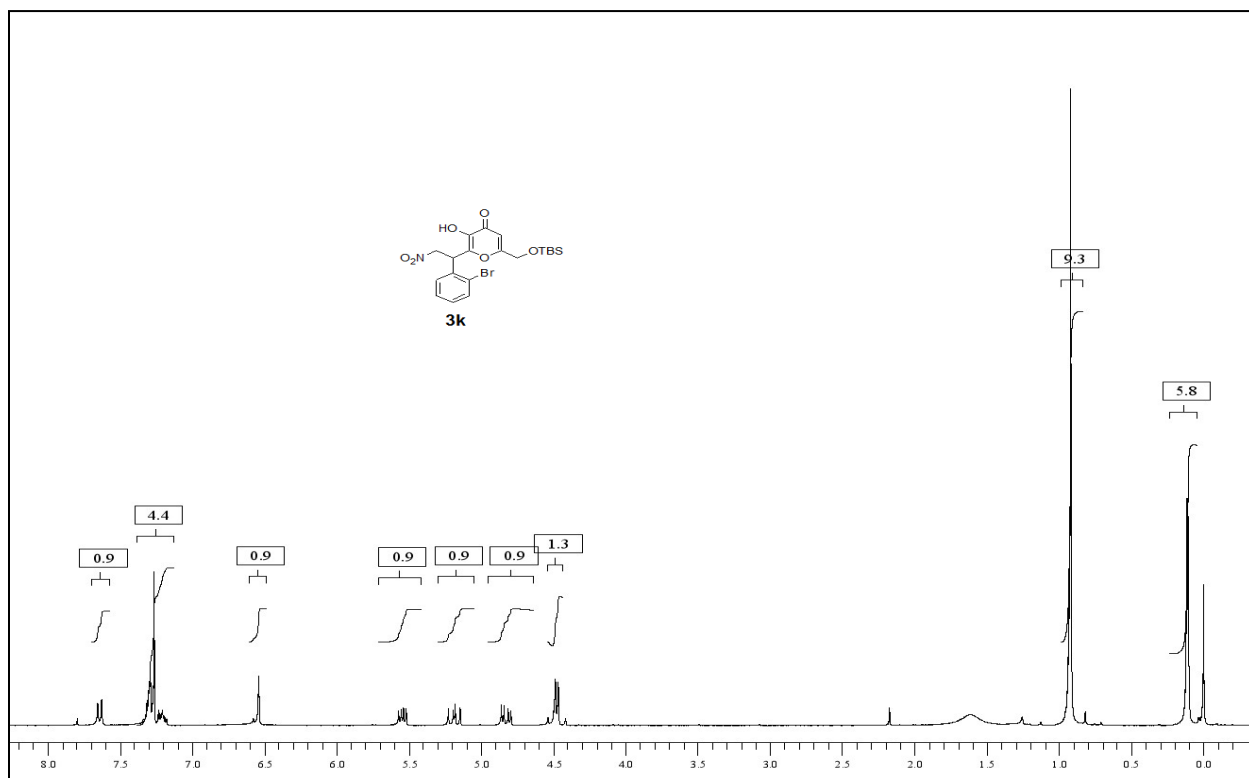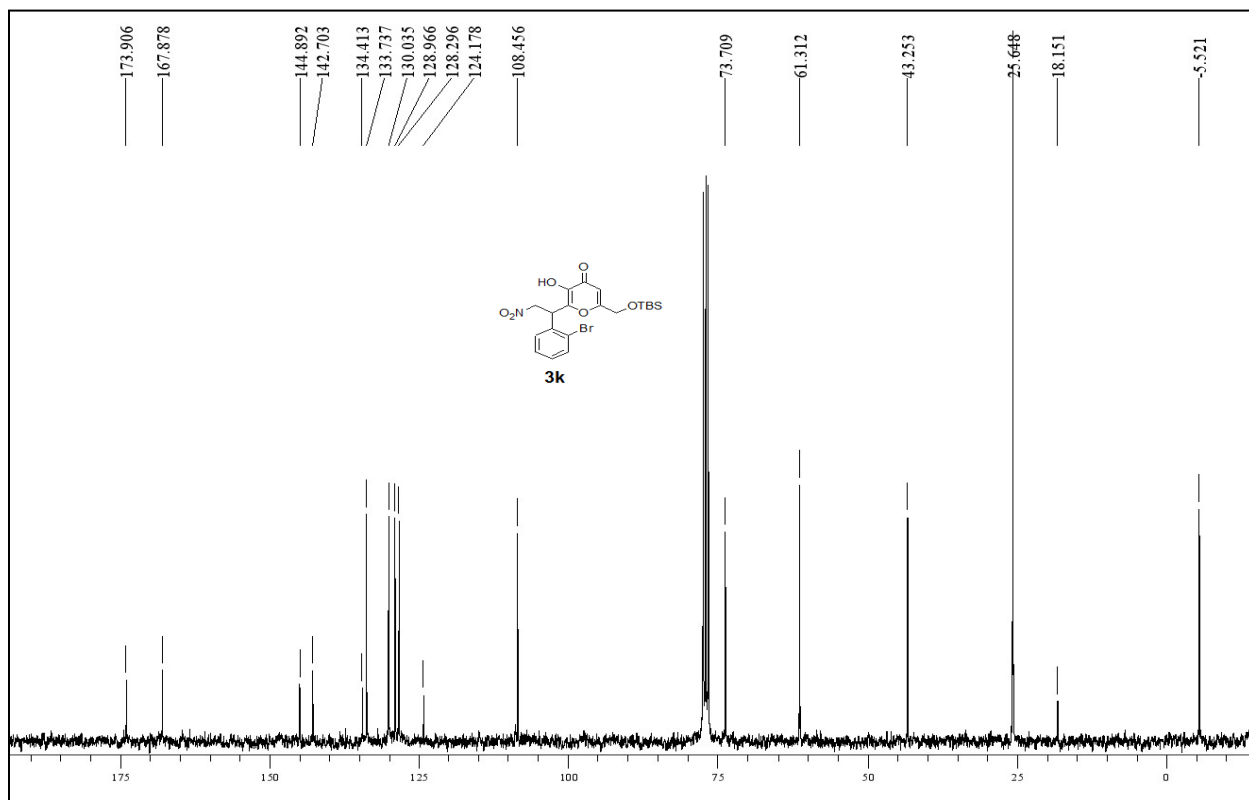

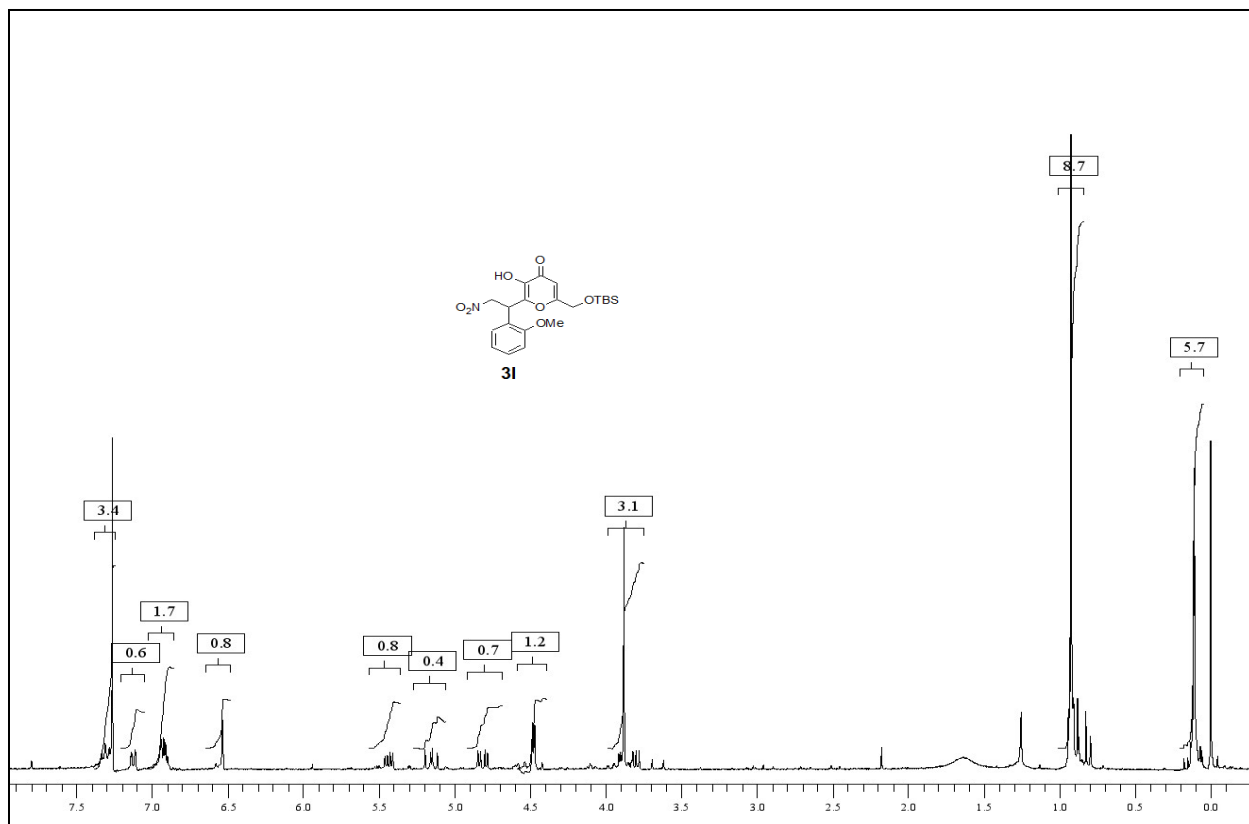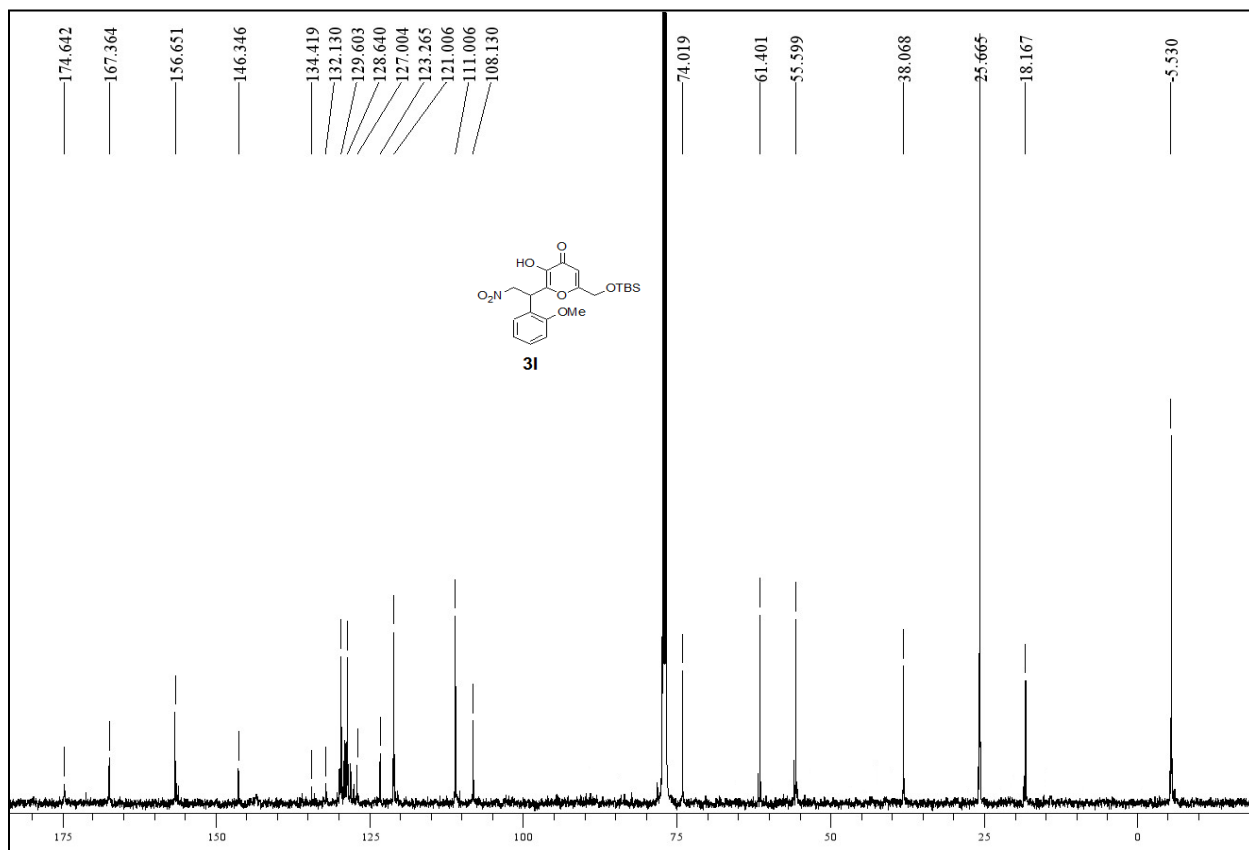

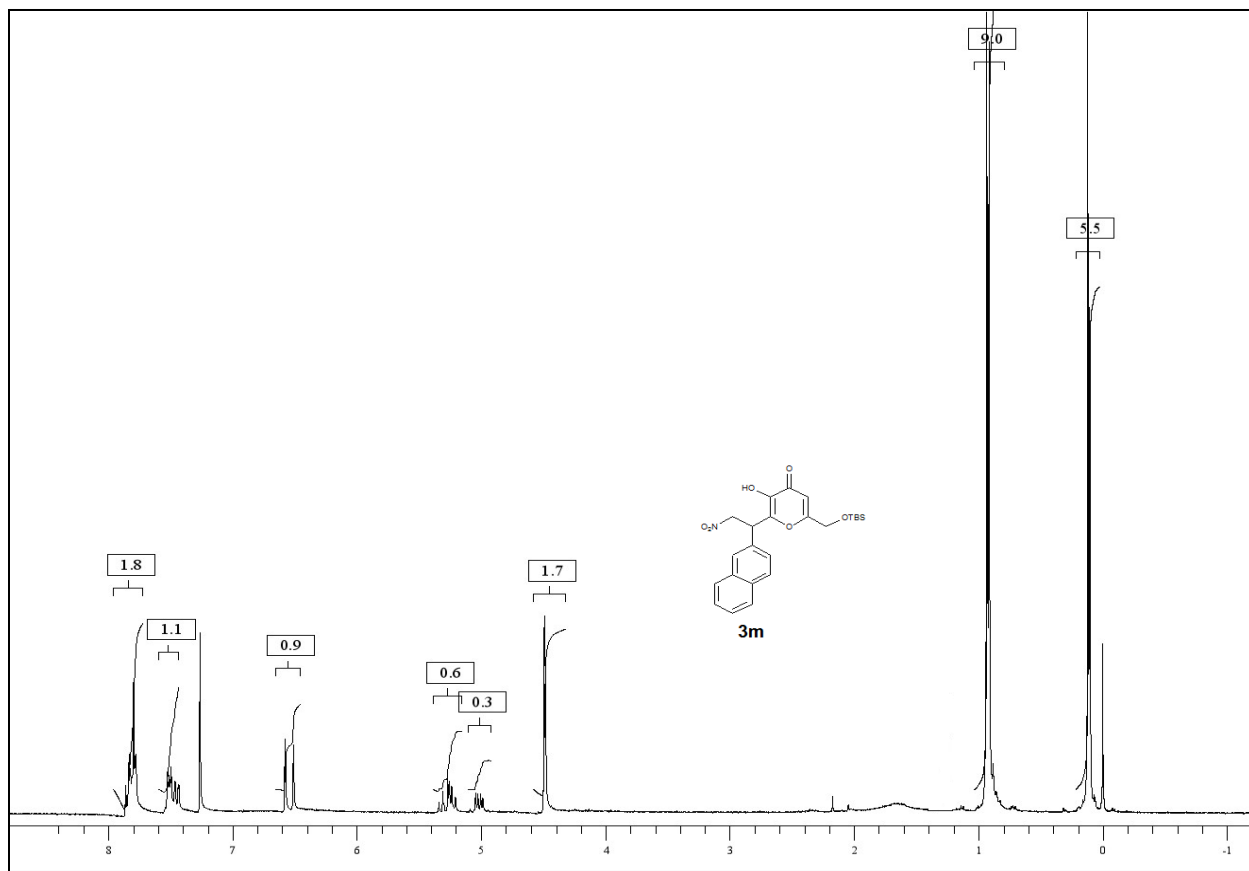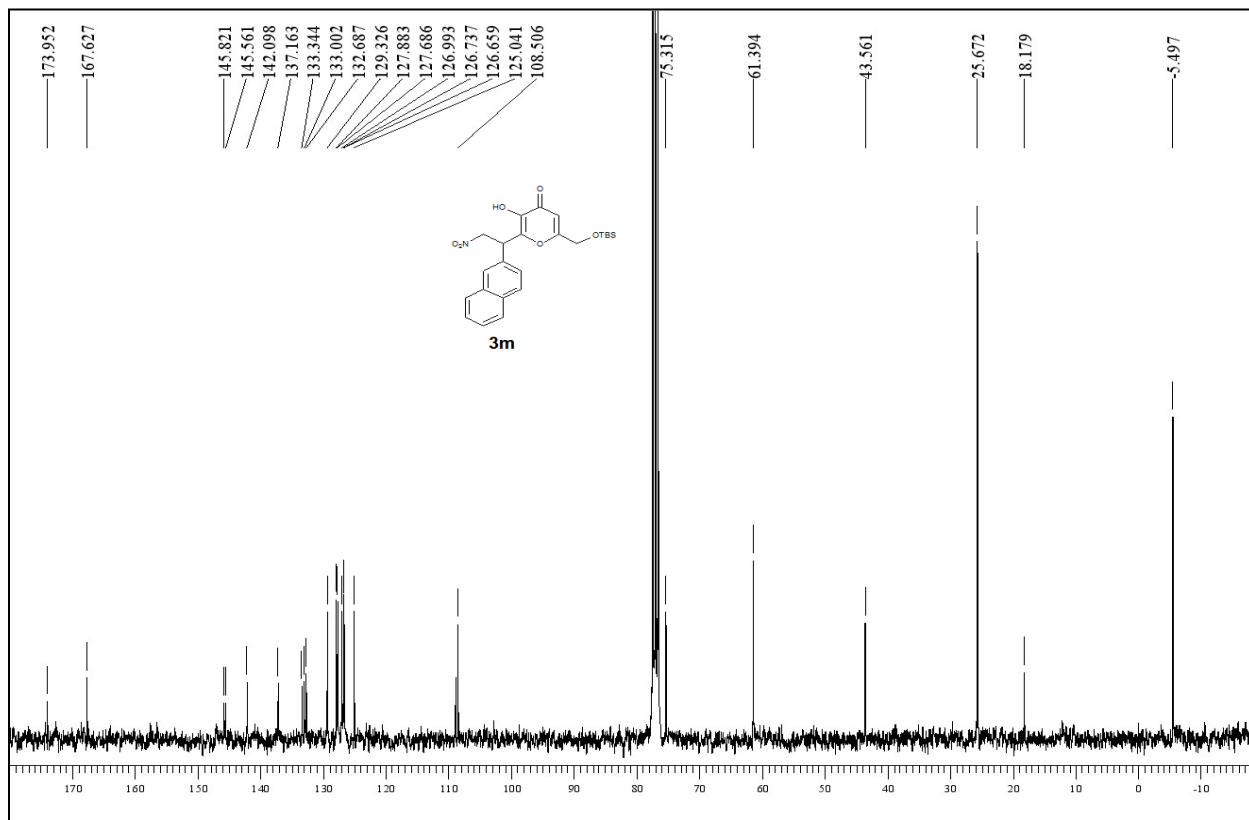

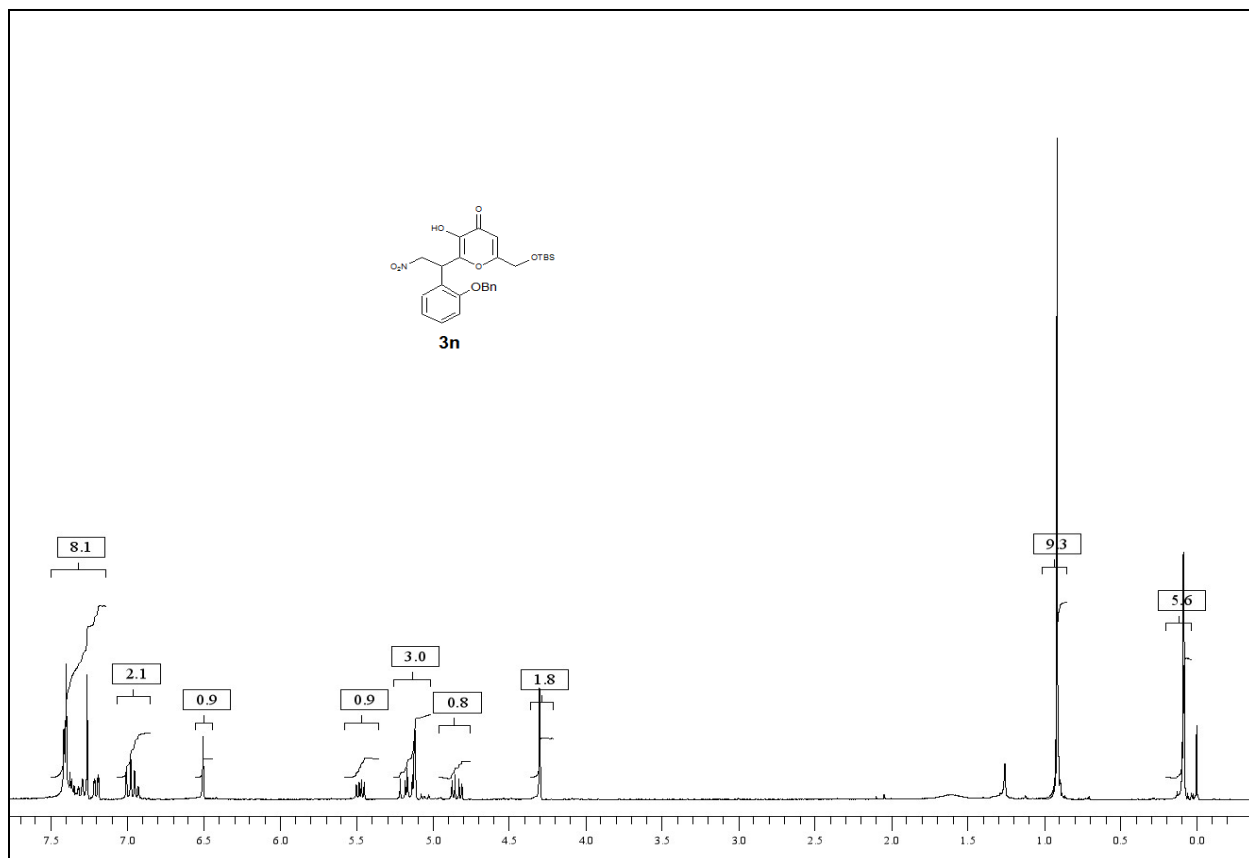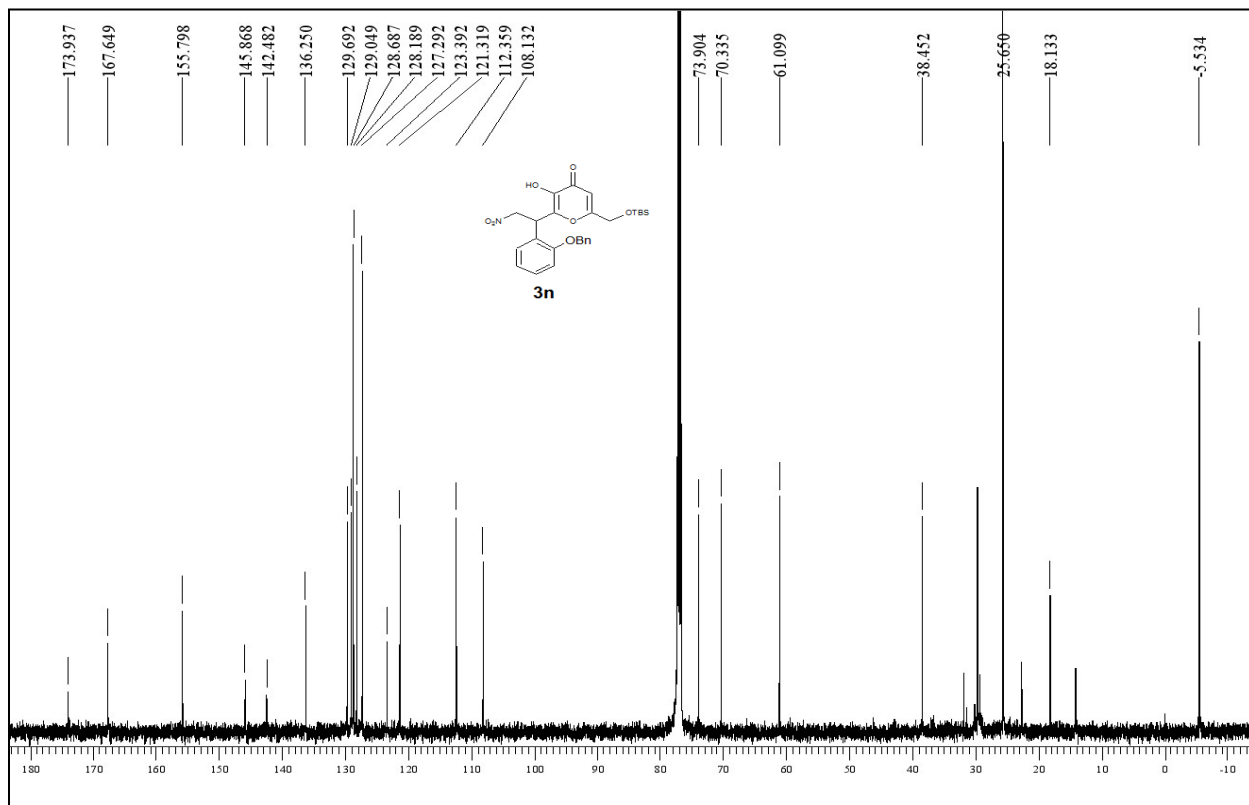

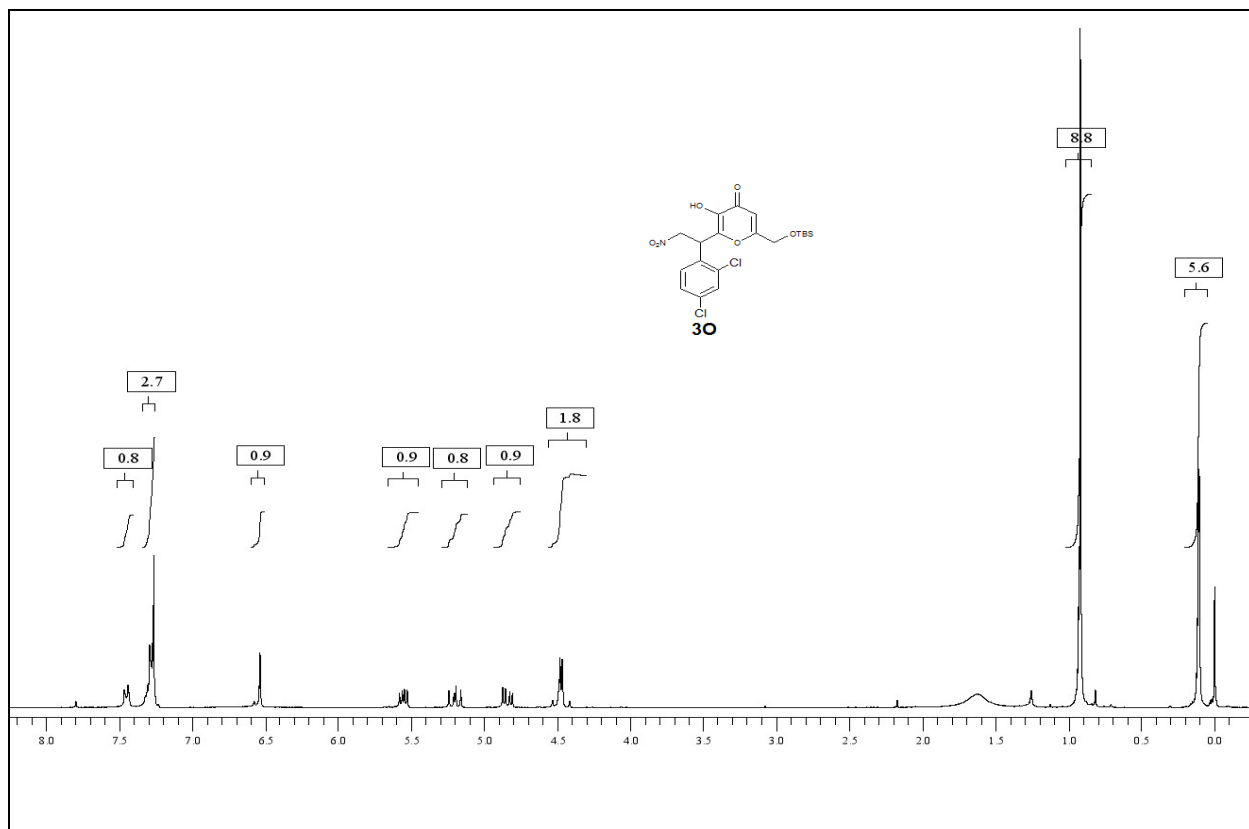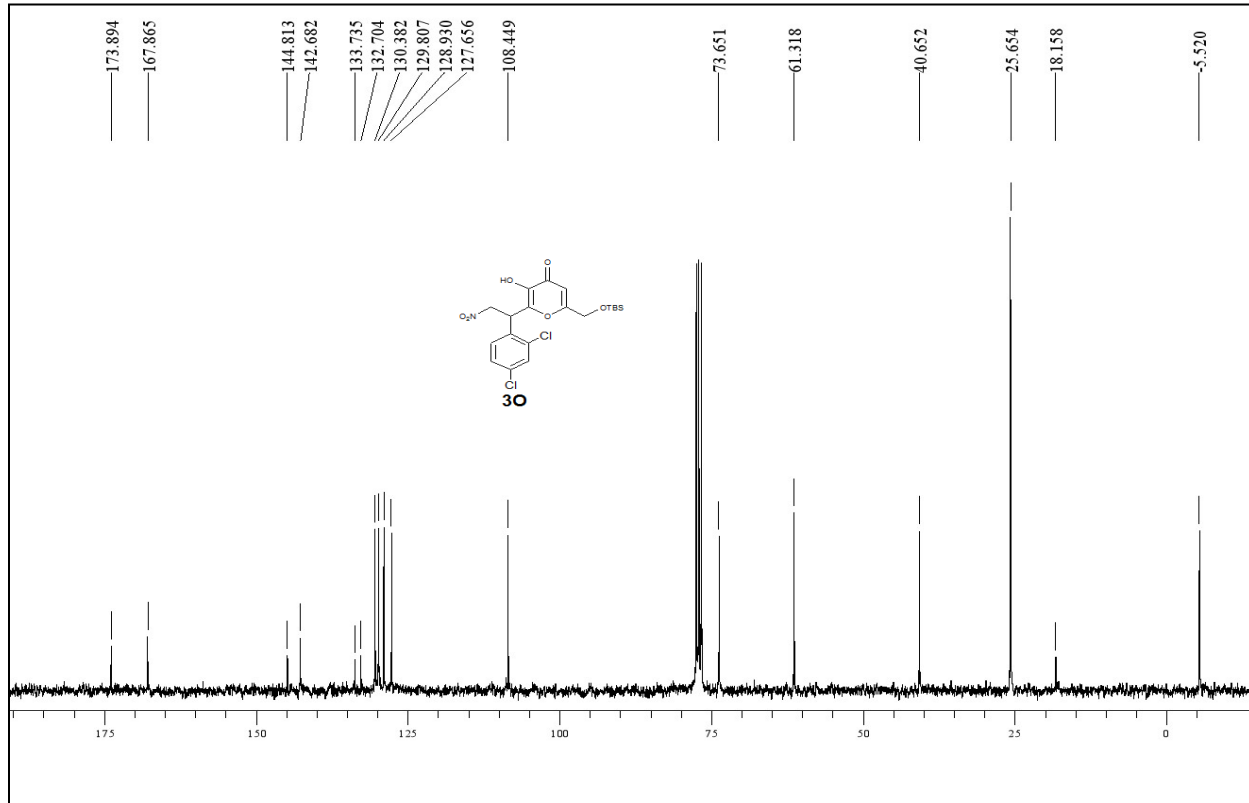

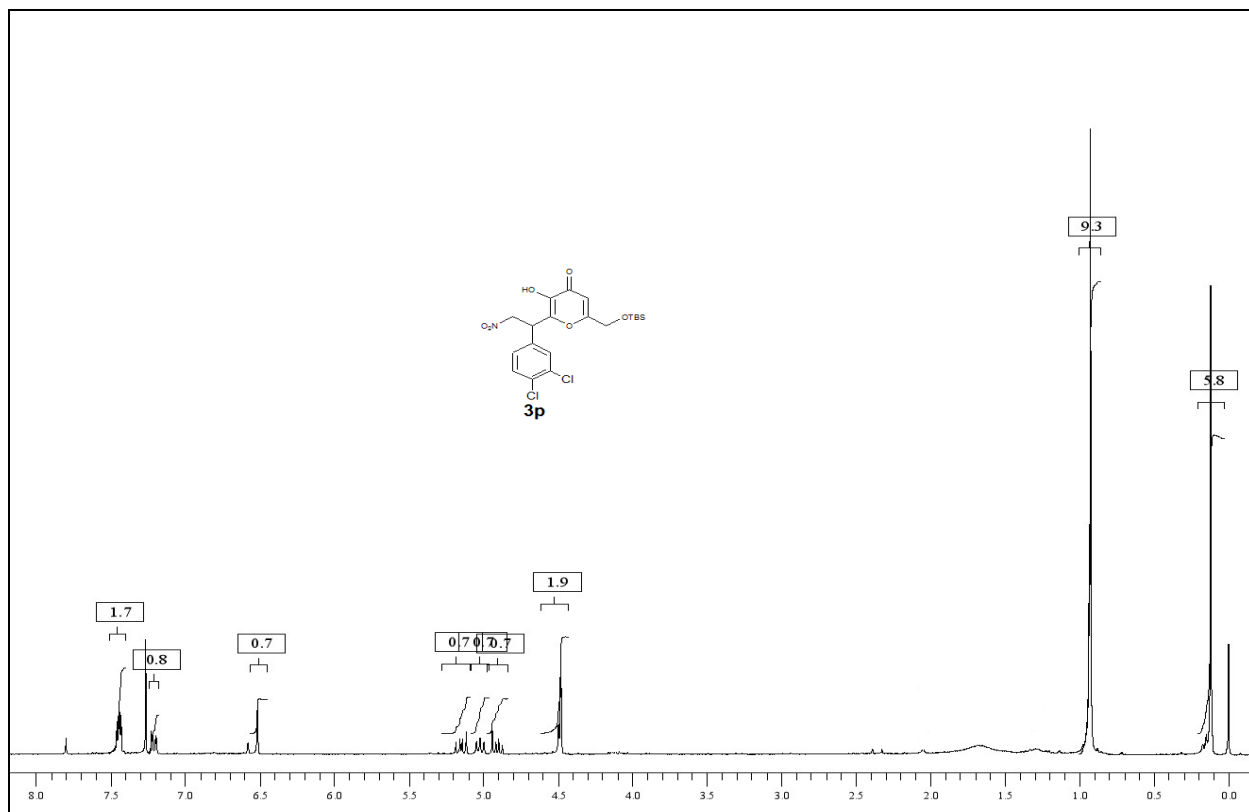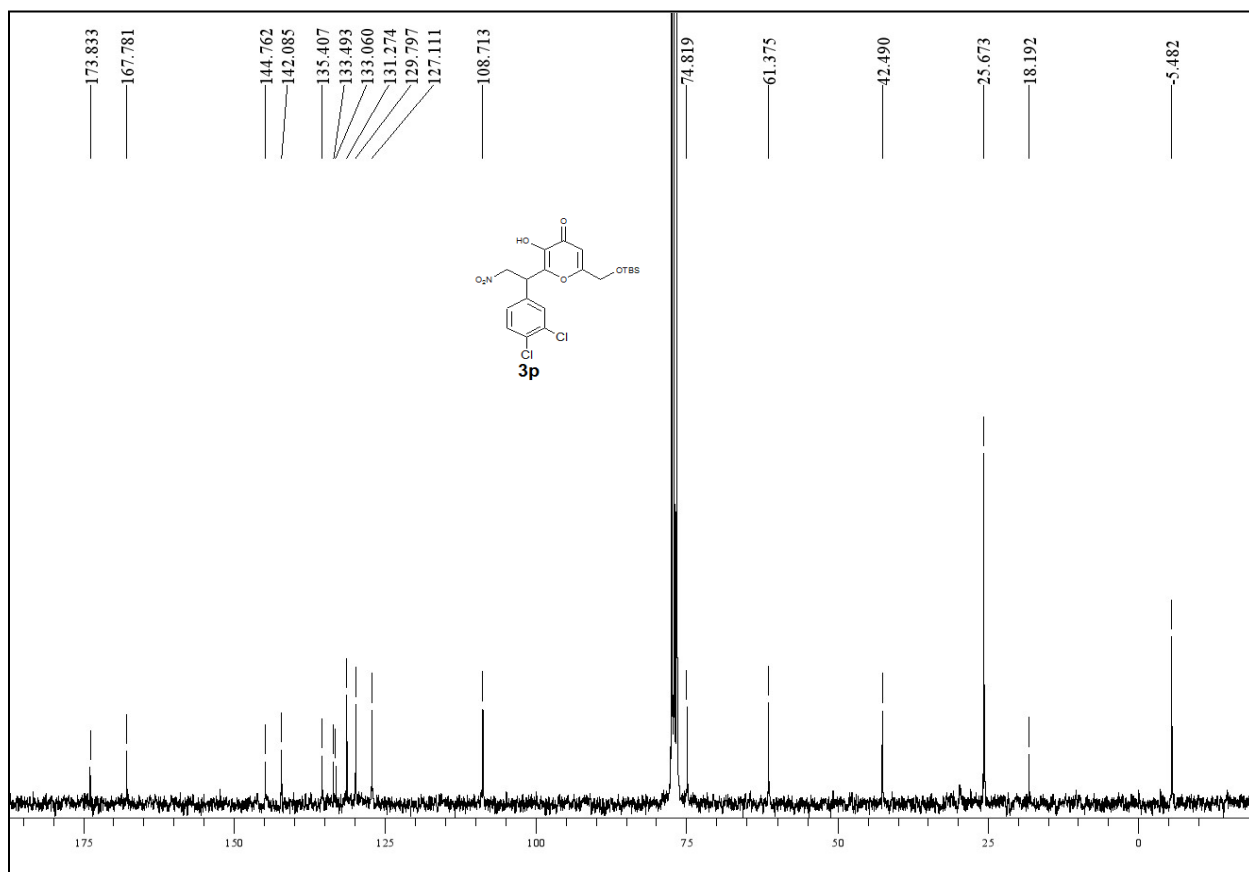

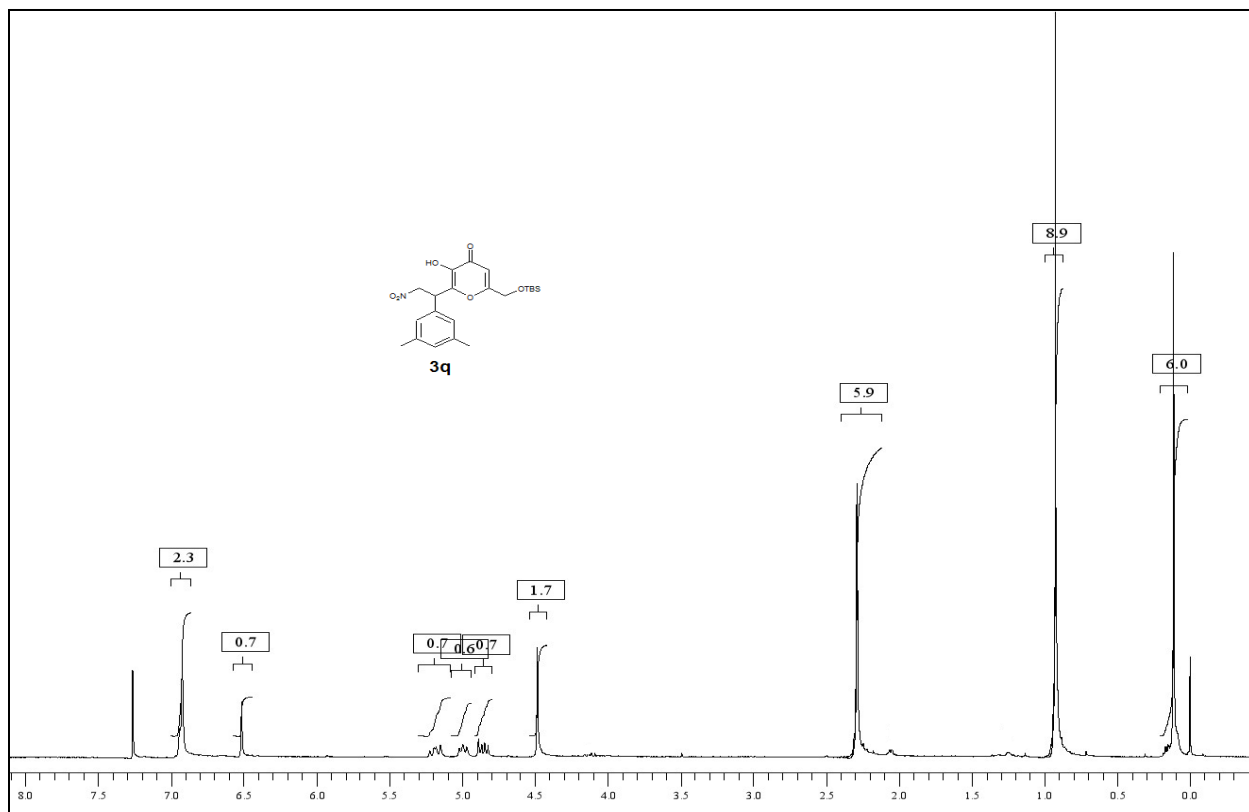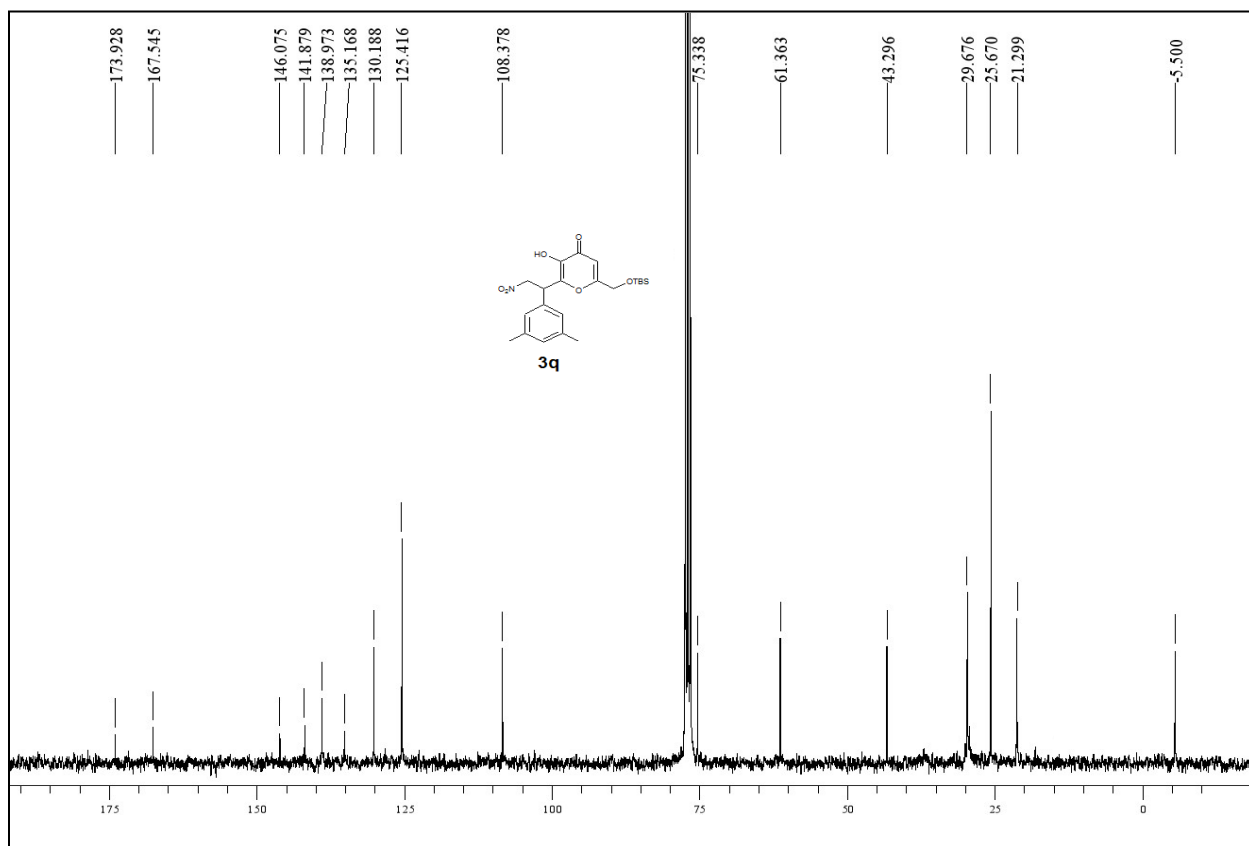

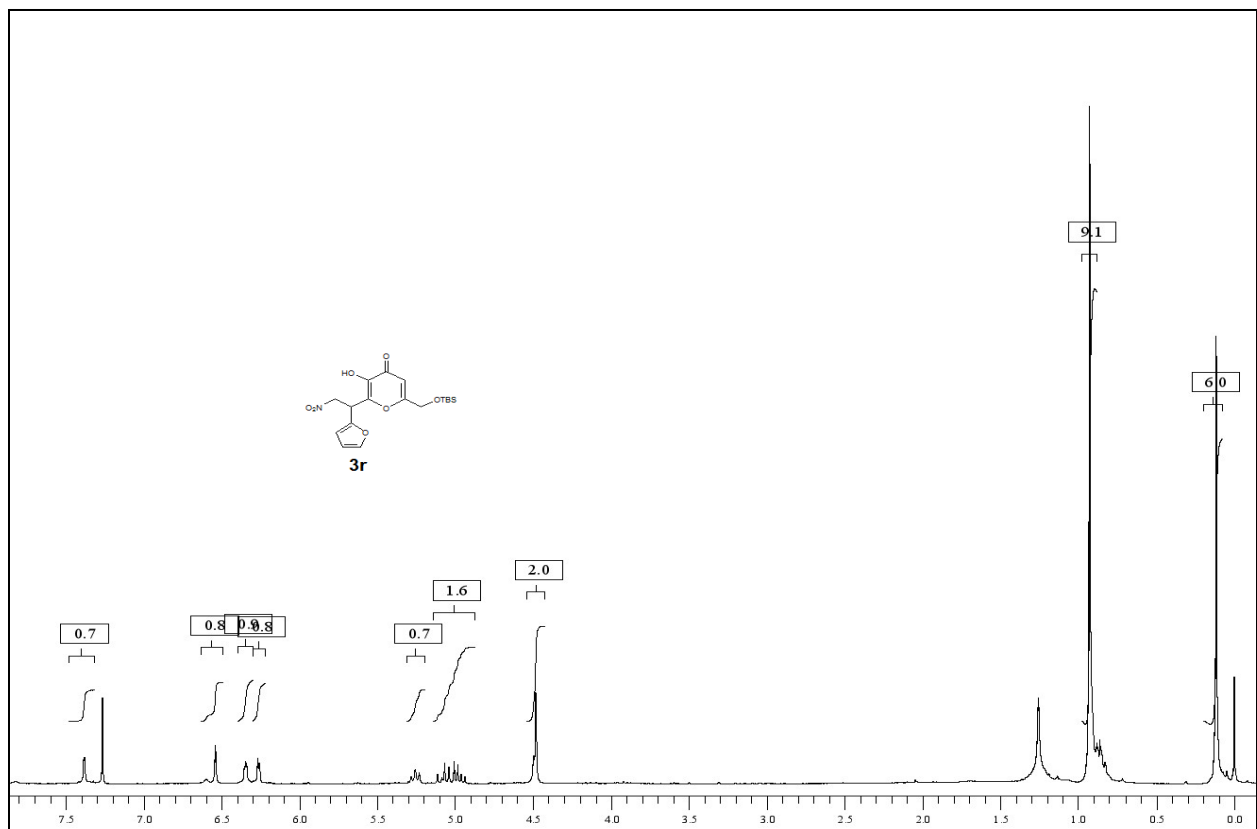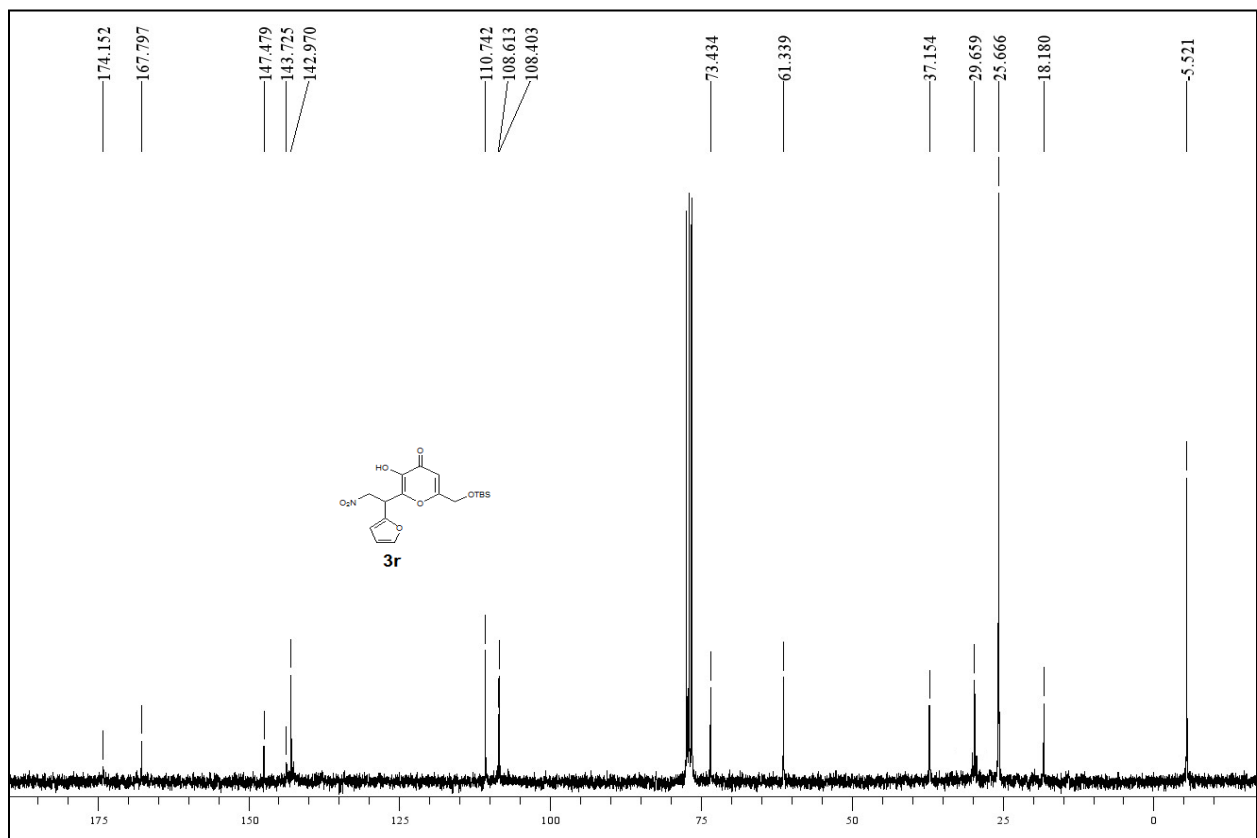



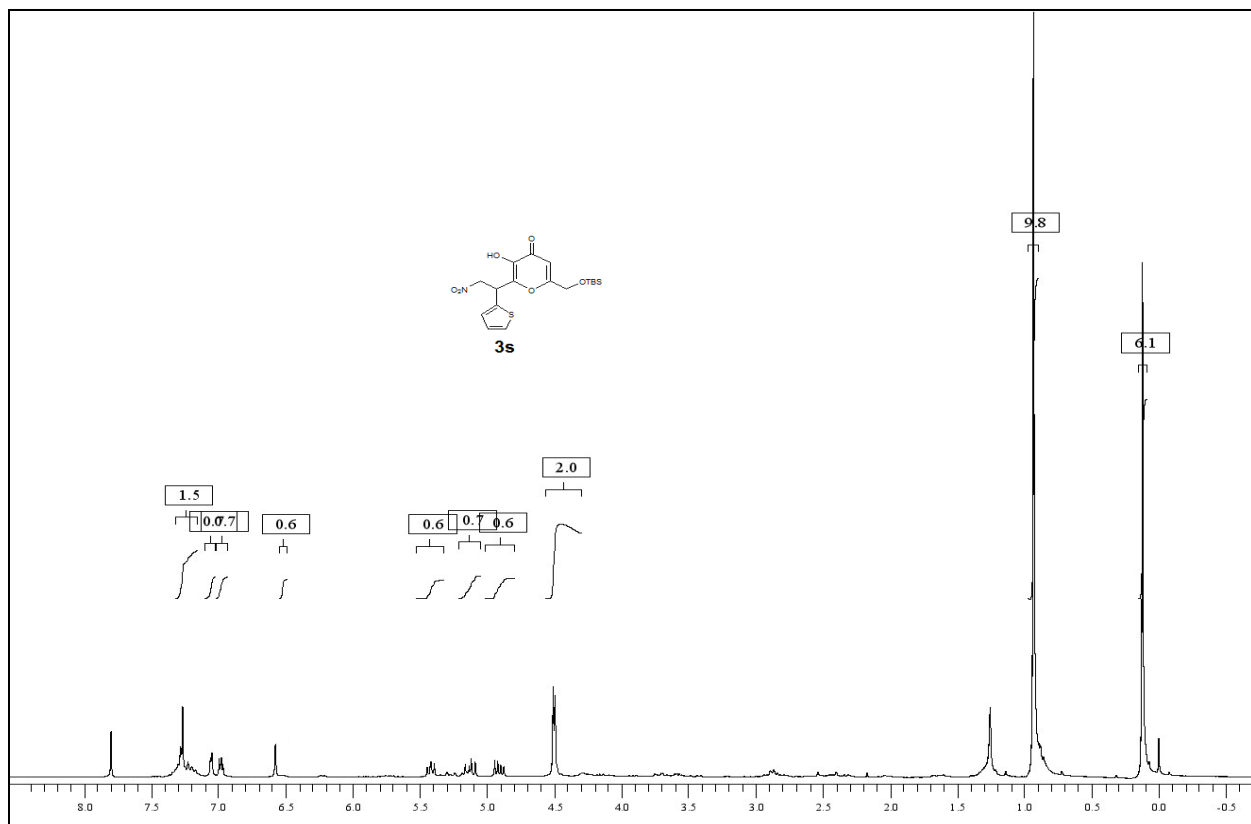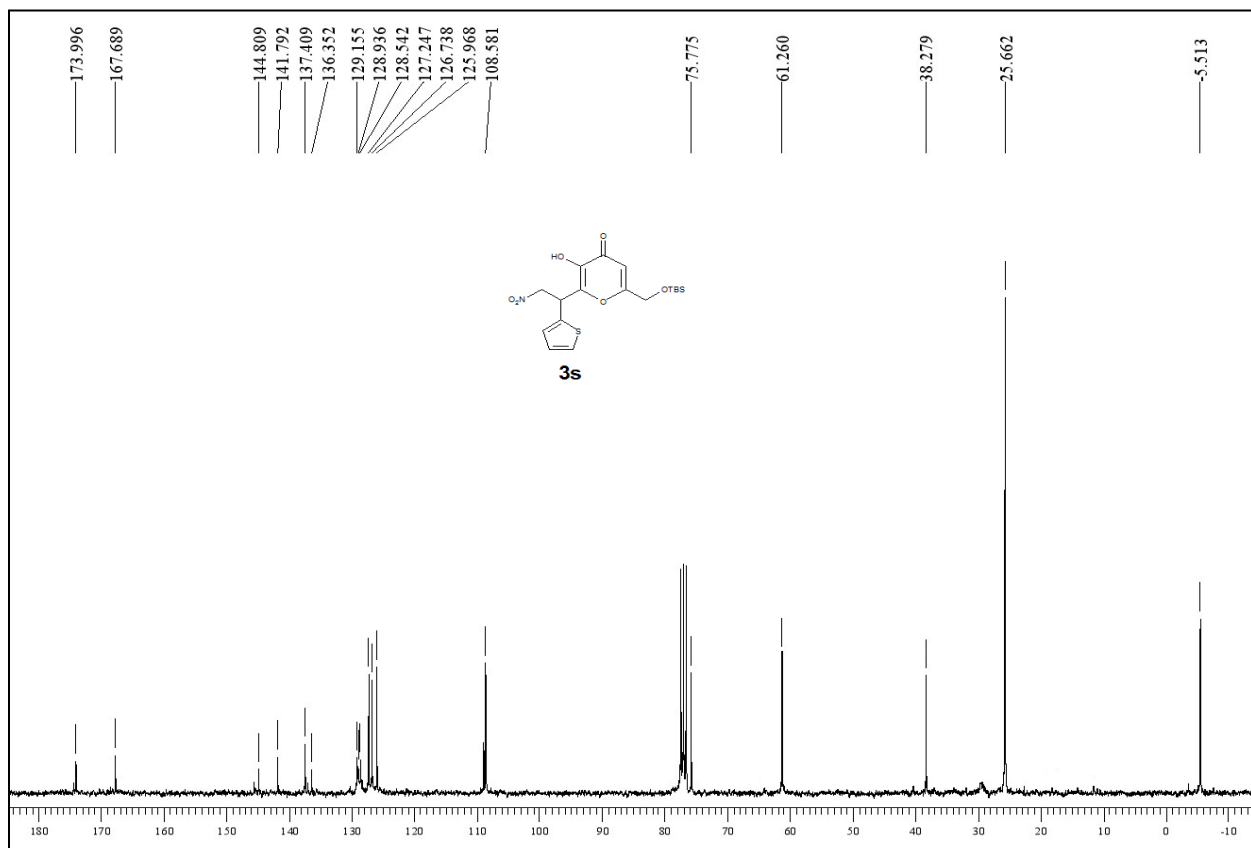

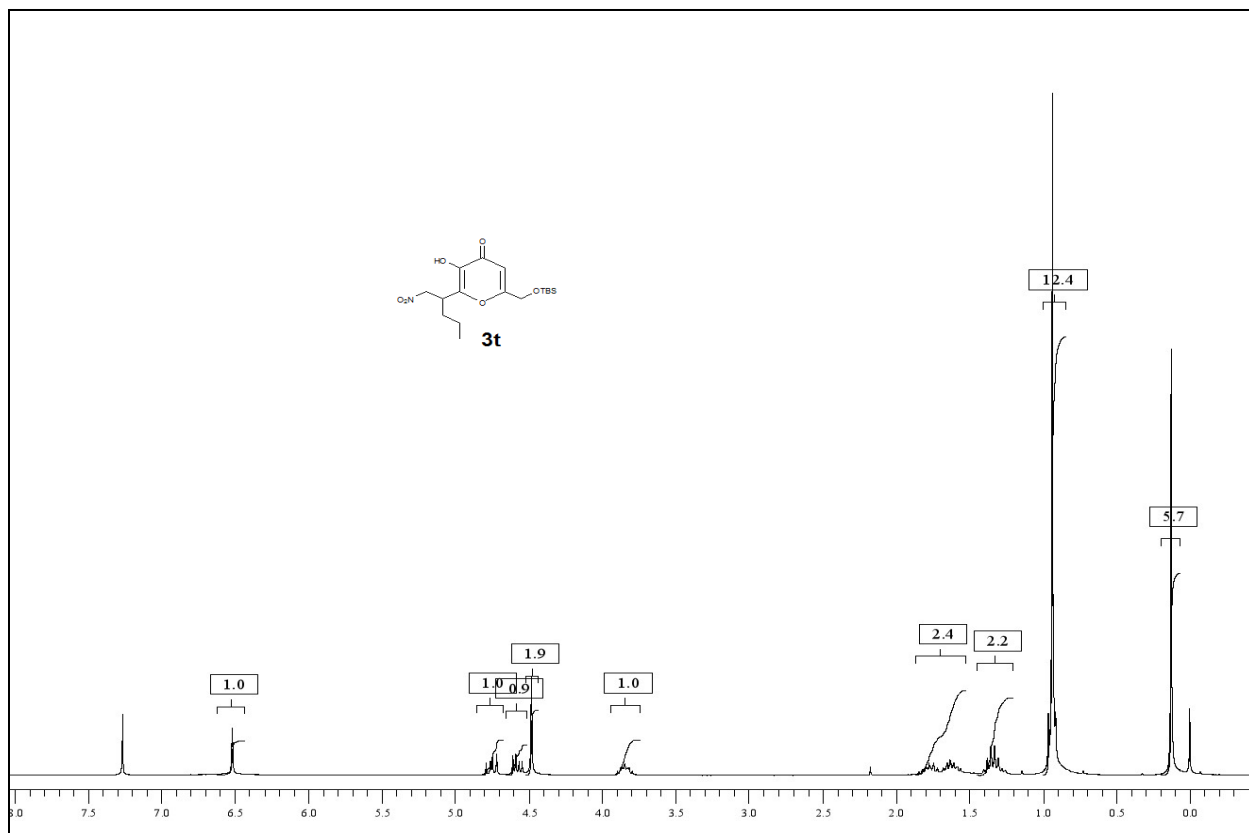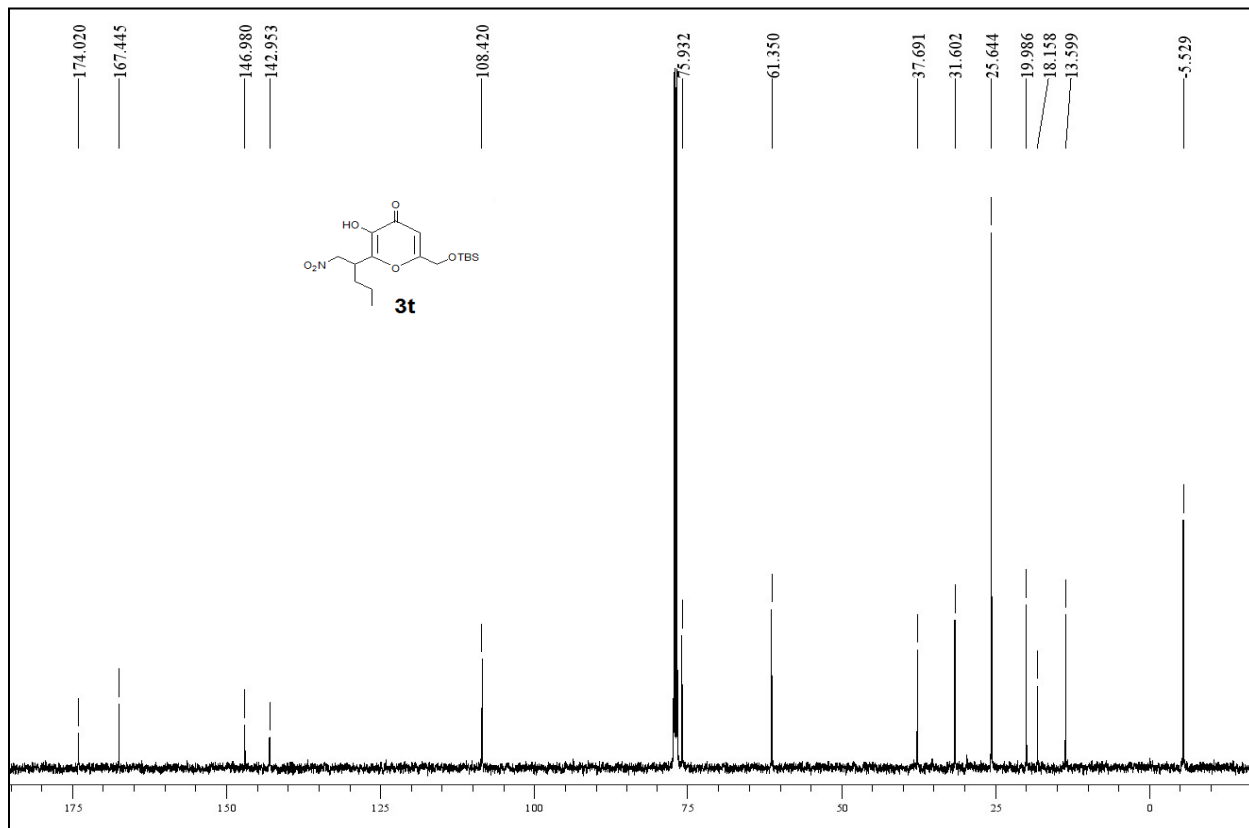

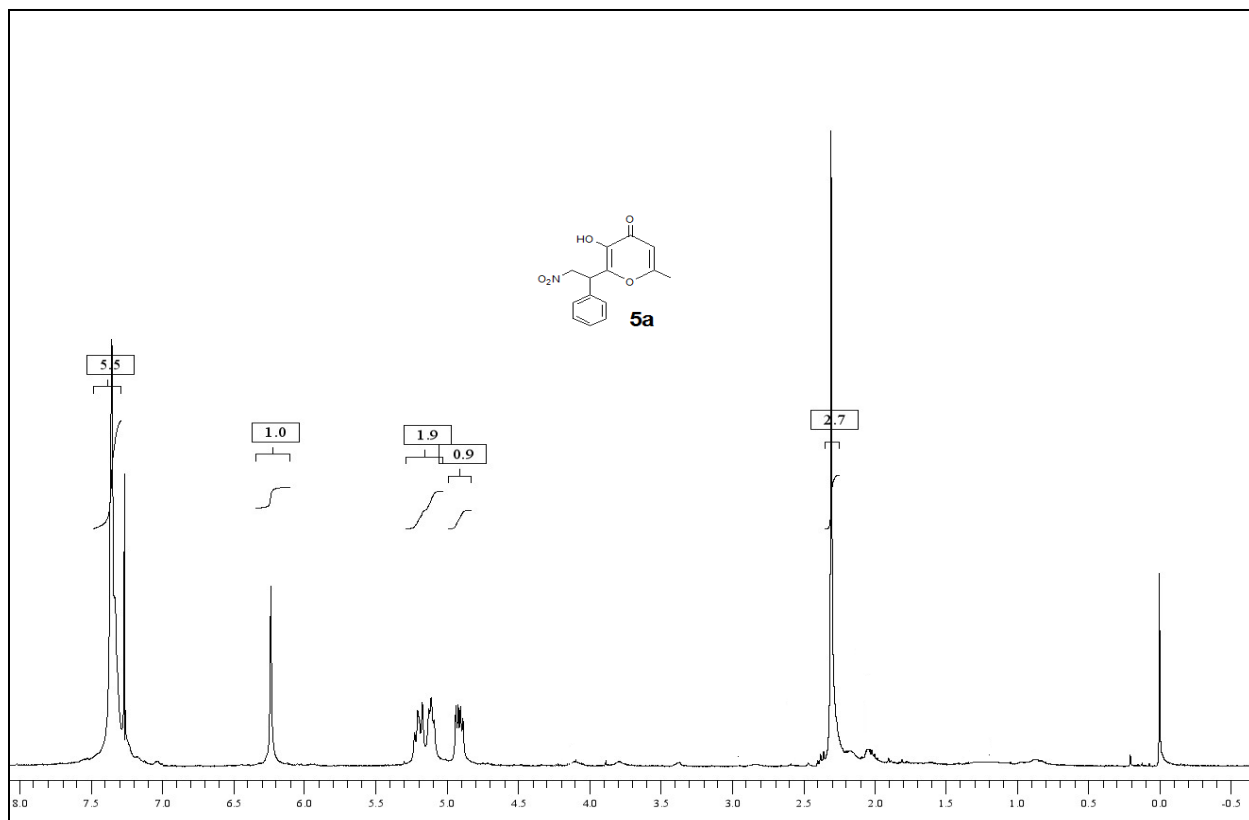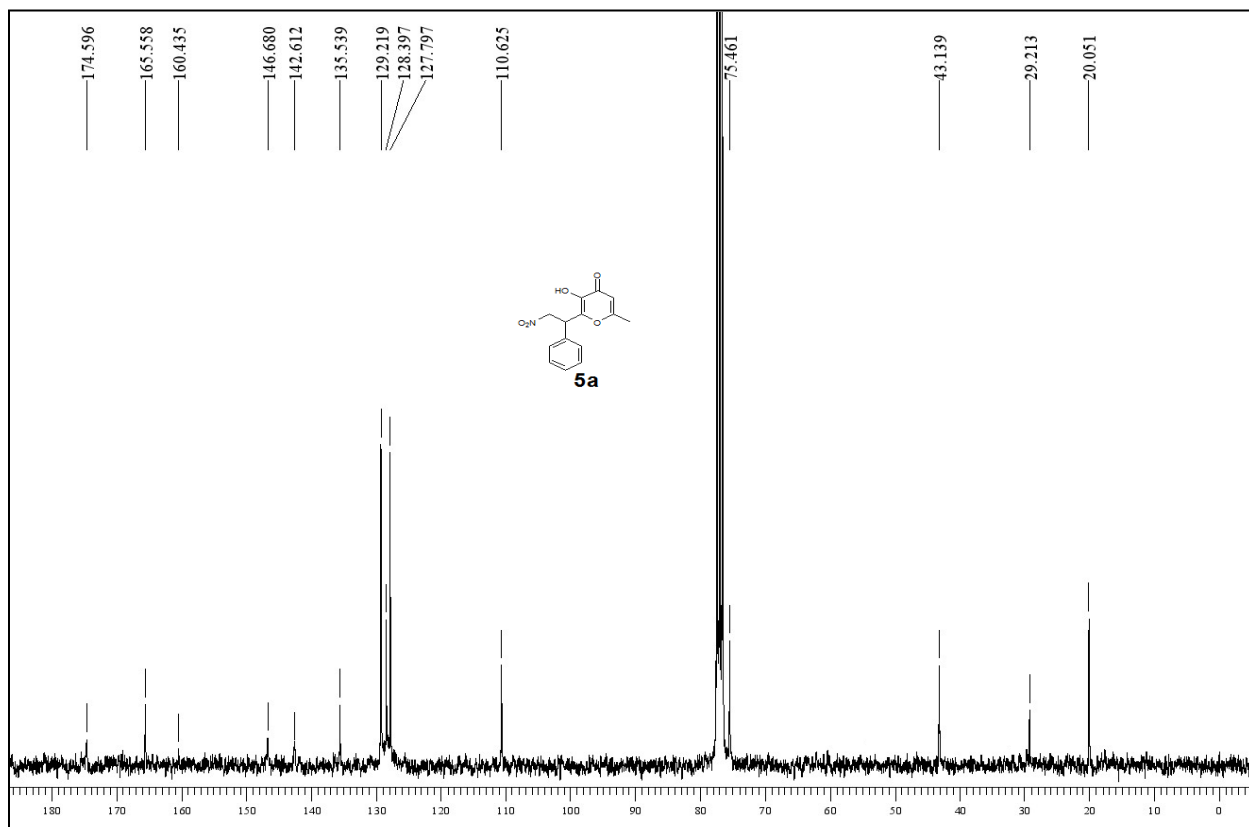

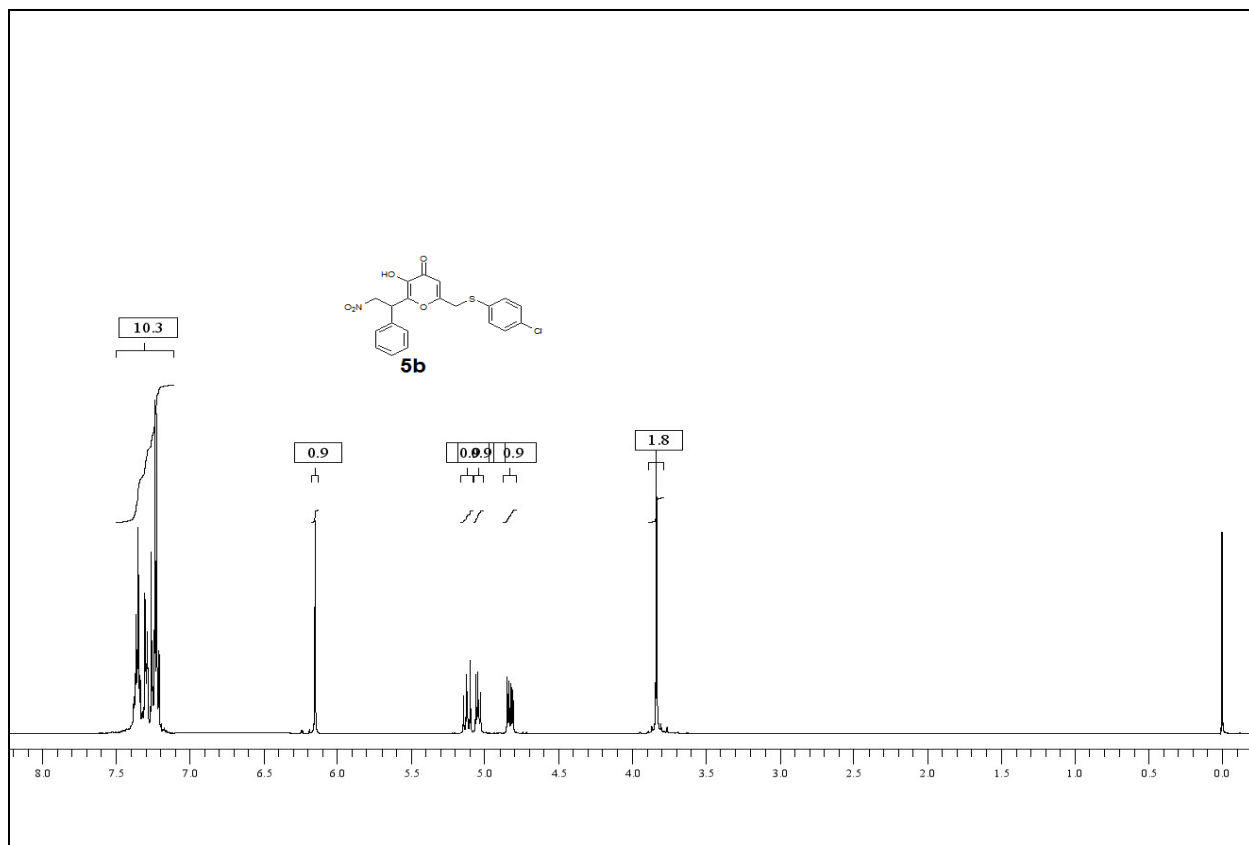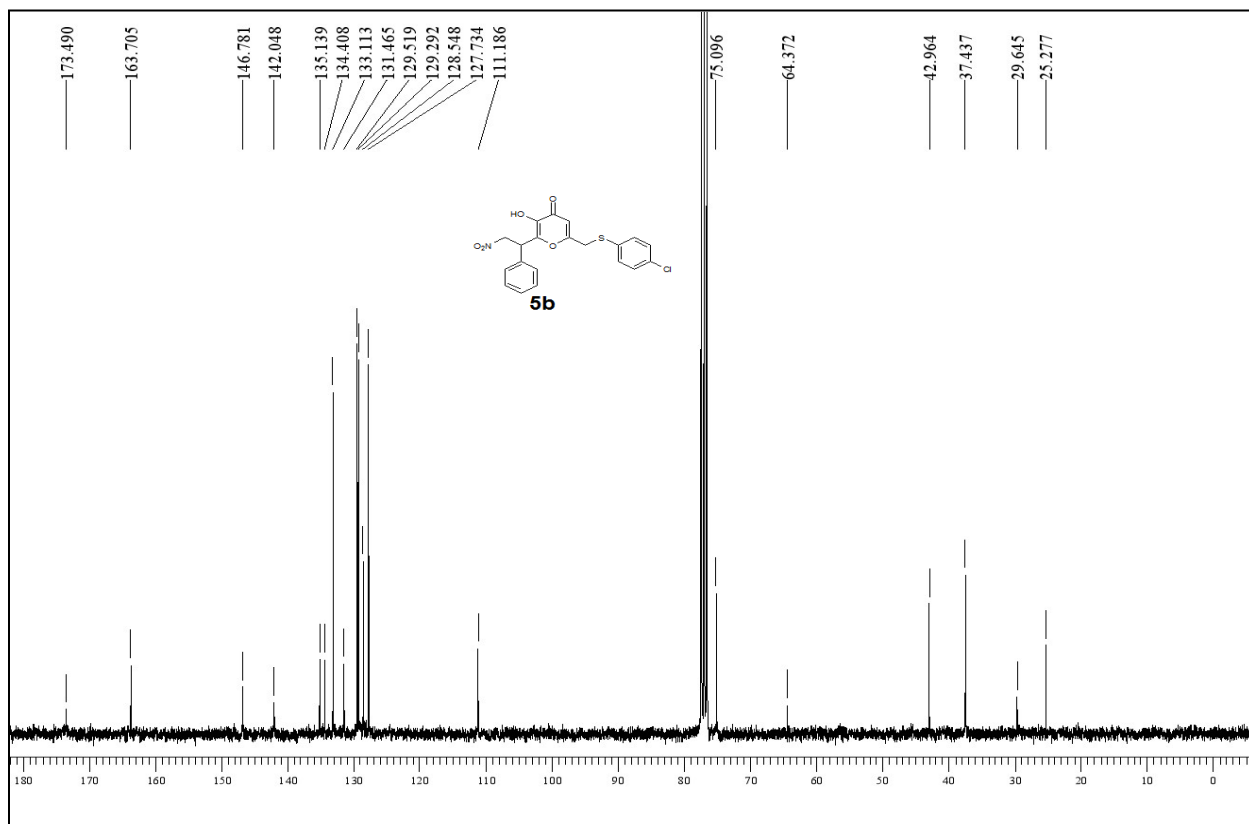

## 9. HPLC diagram of all compounds.

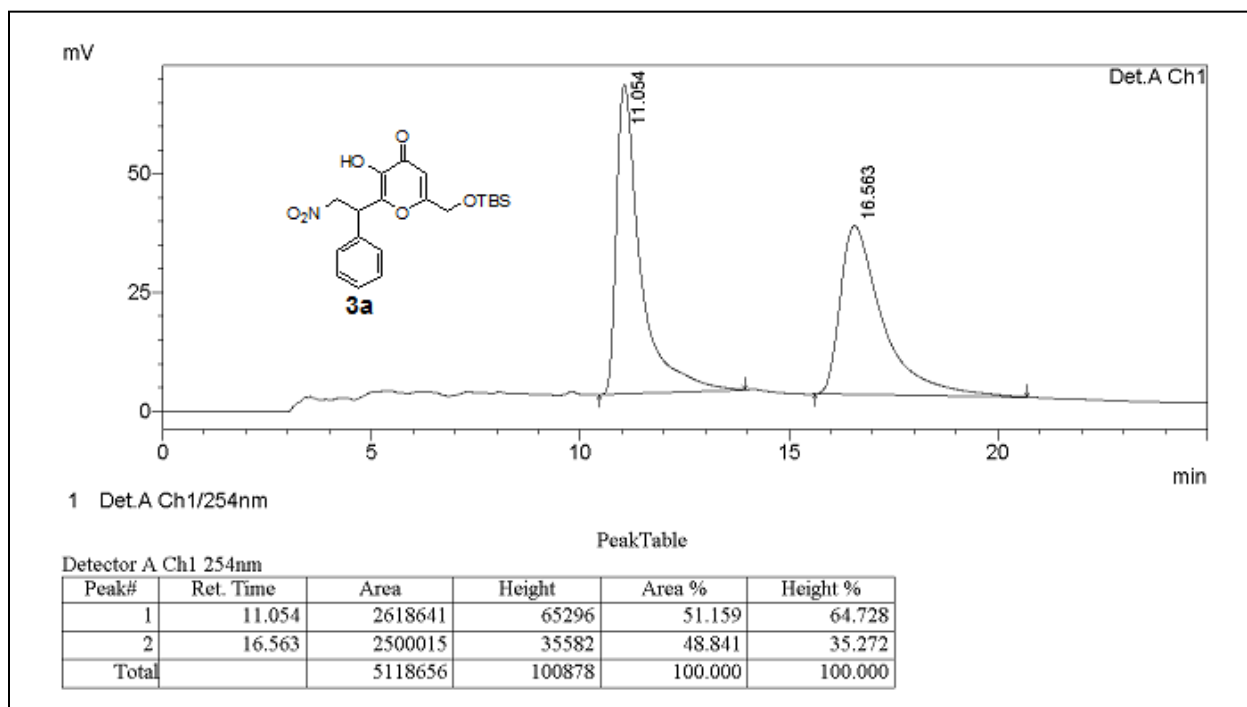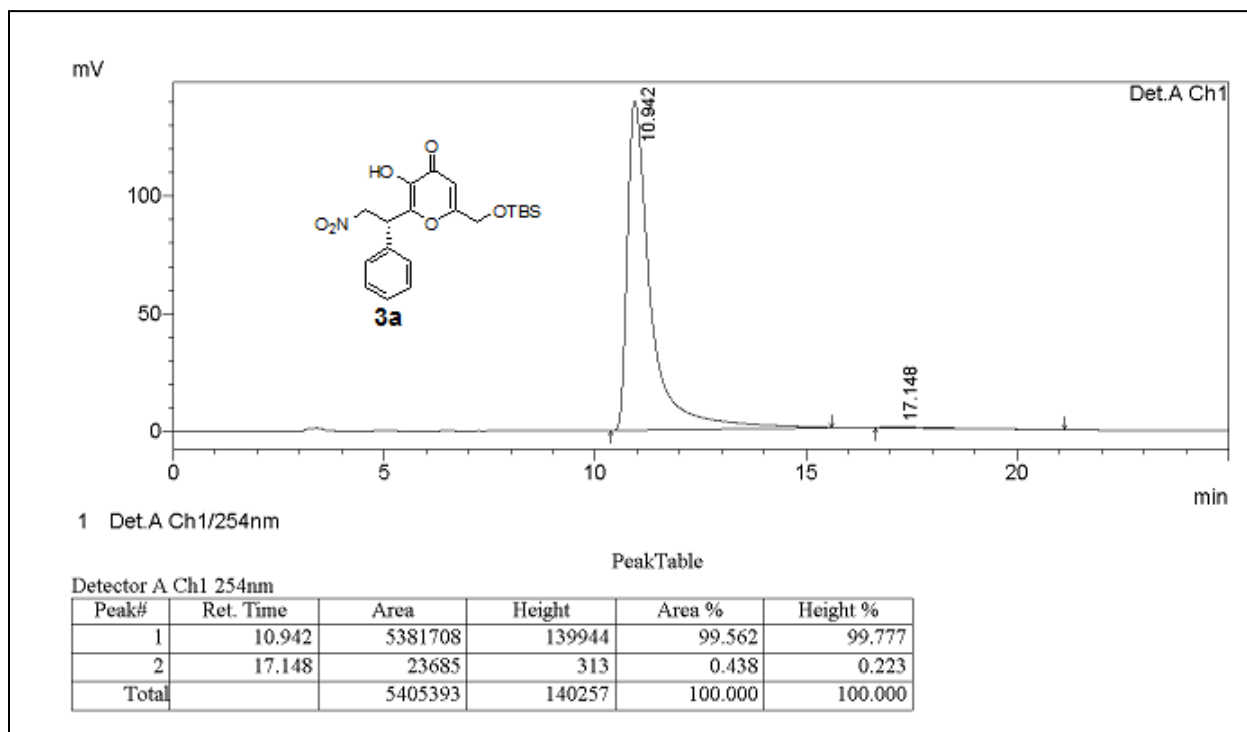

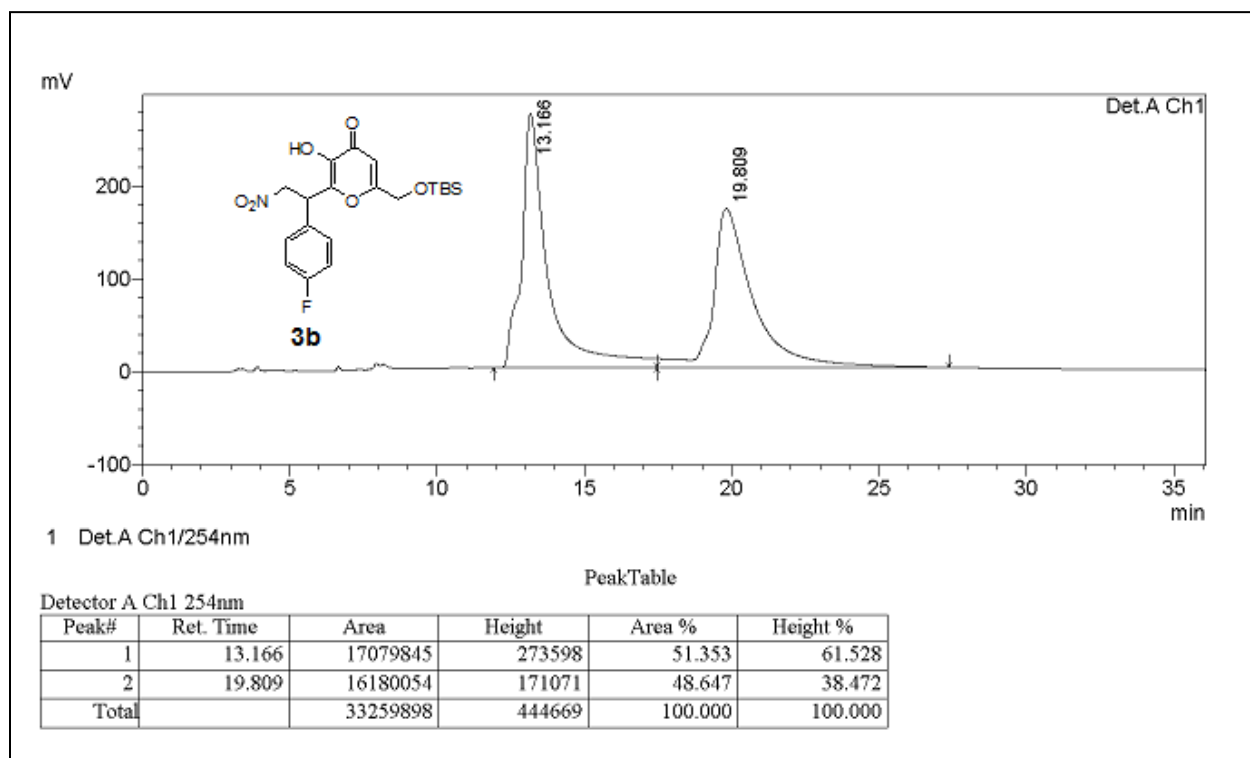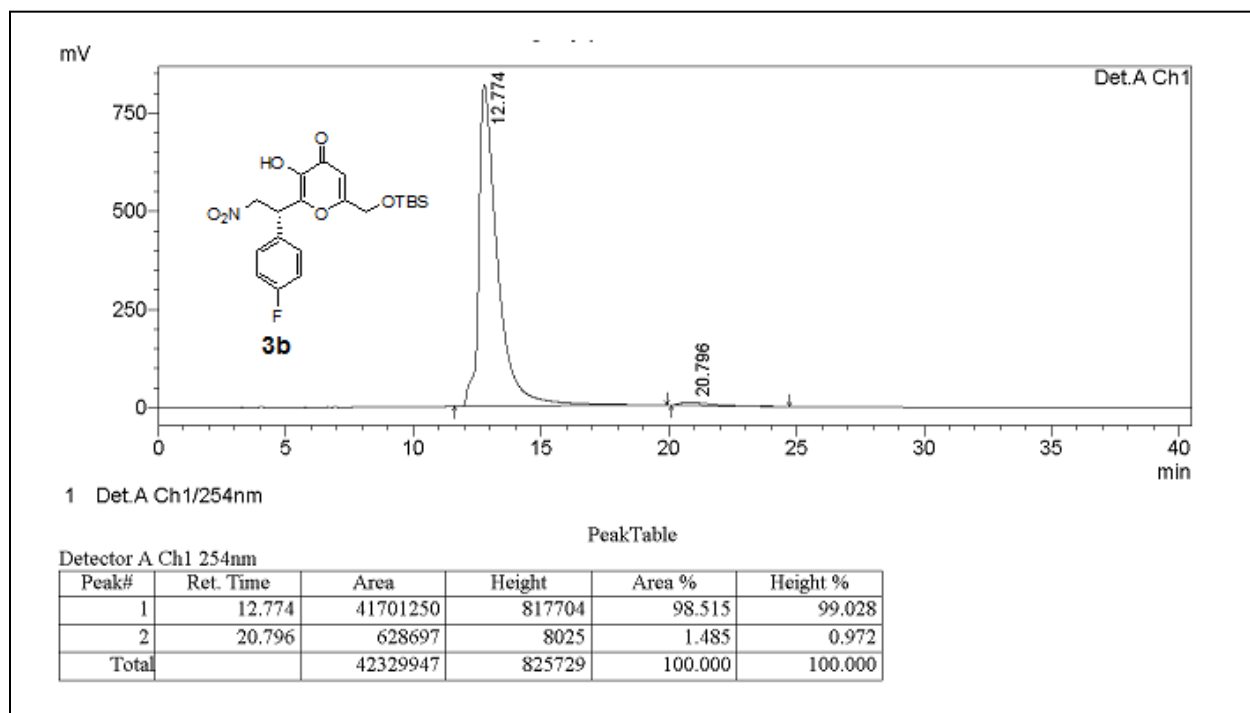

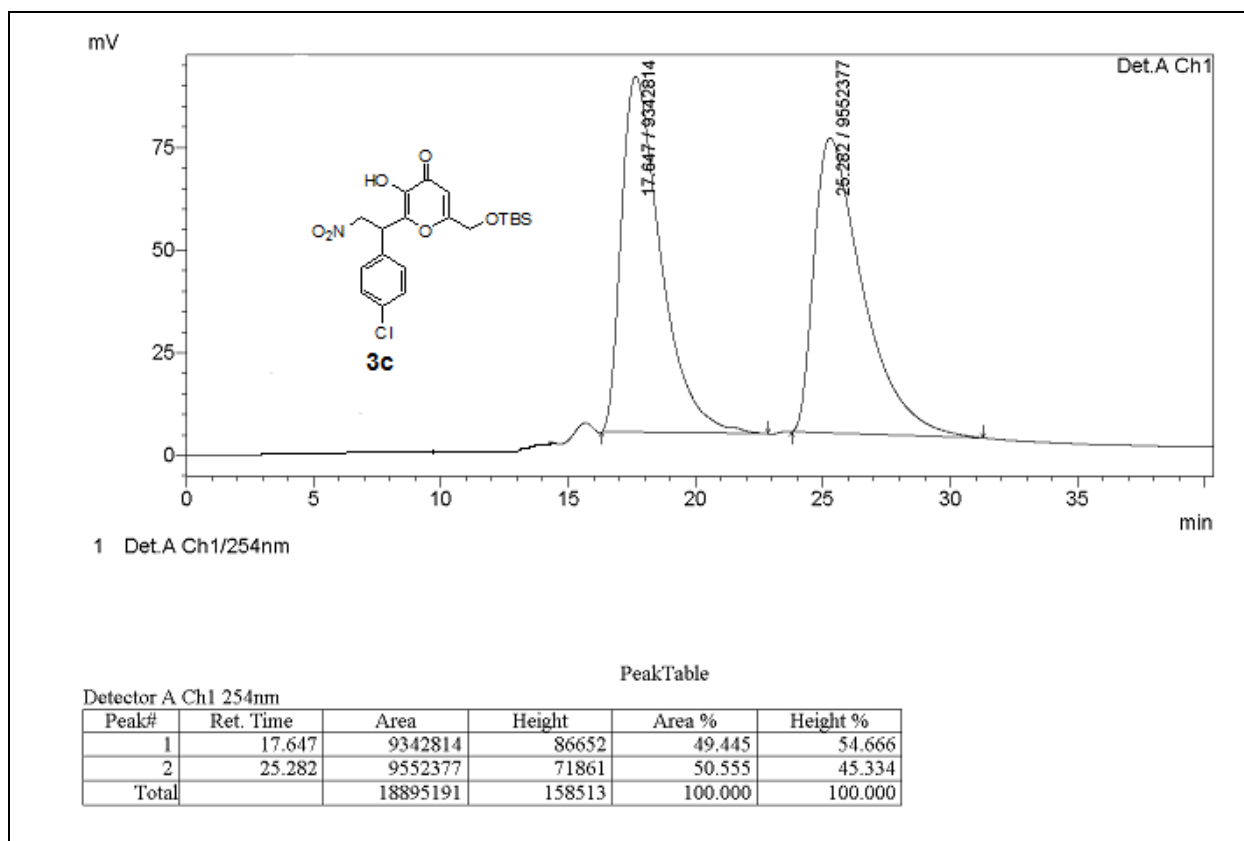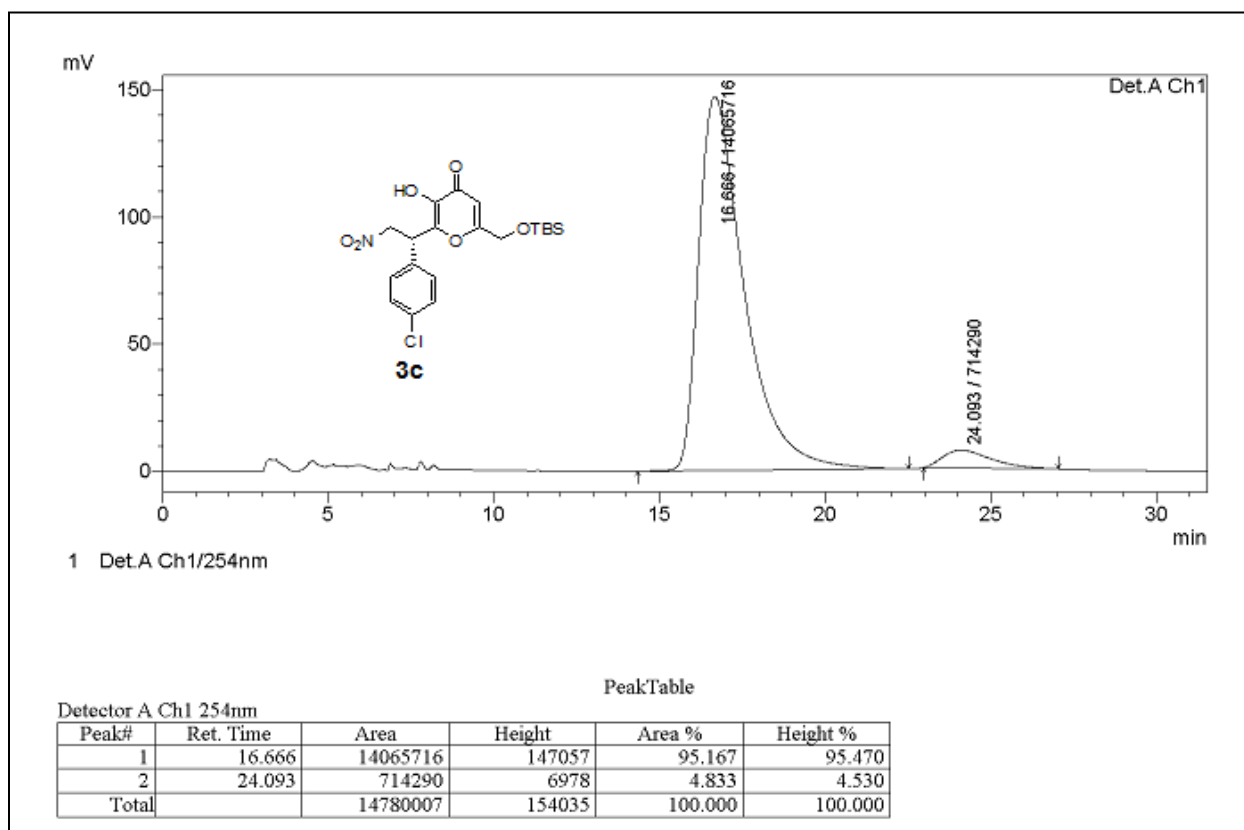

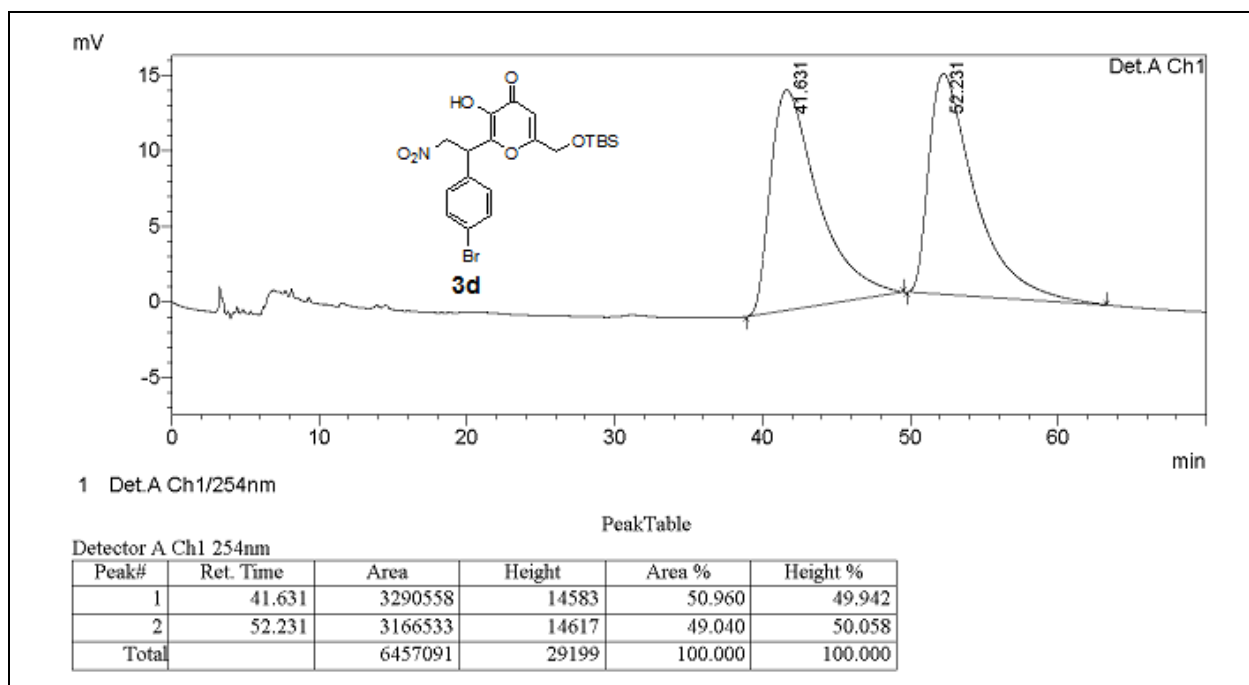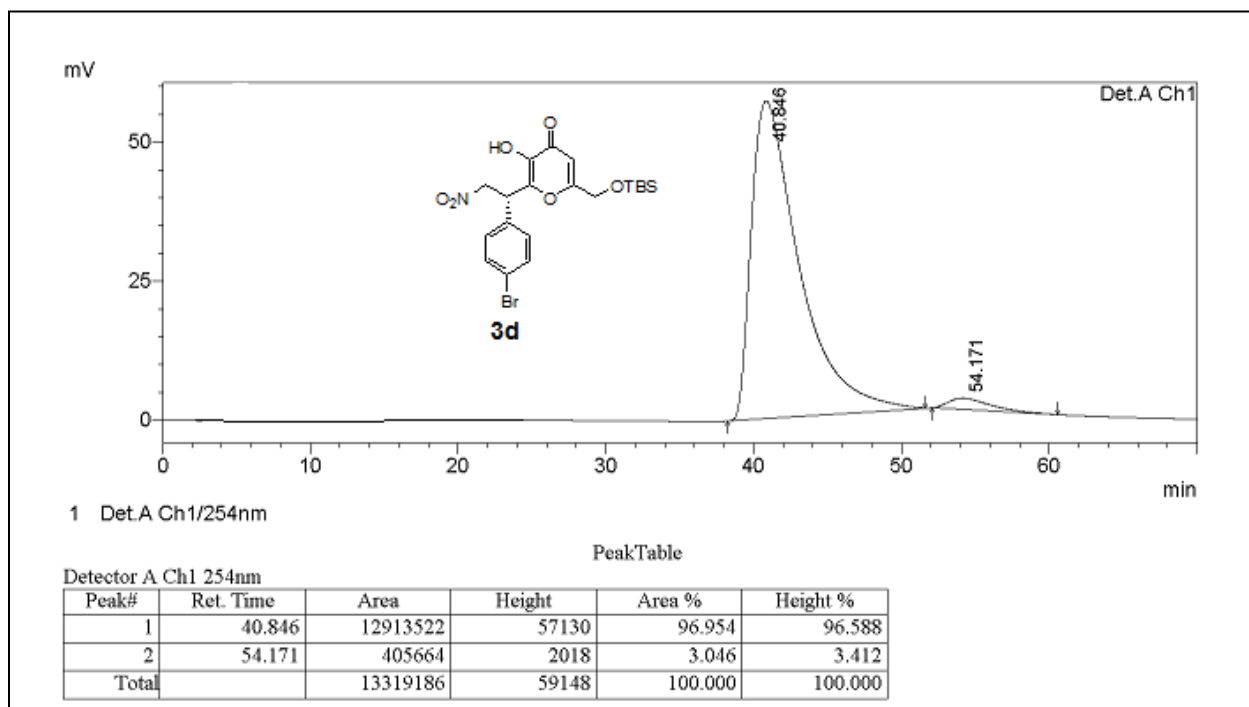



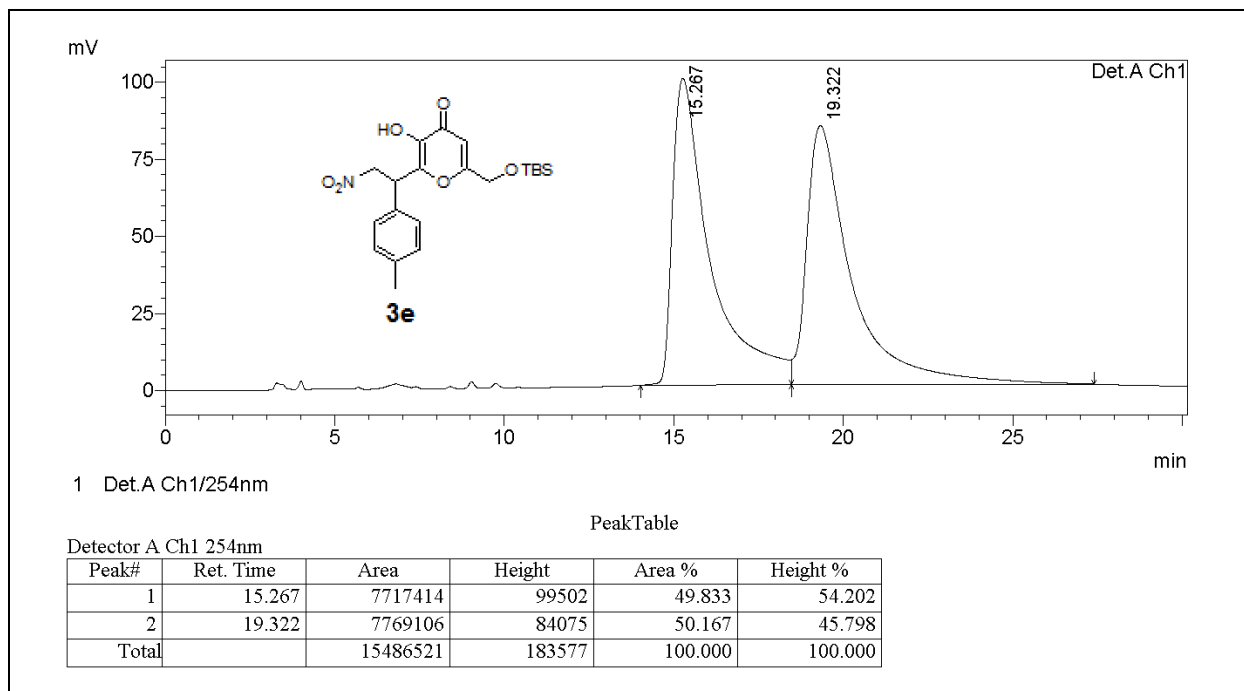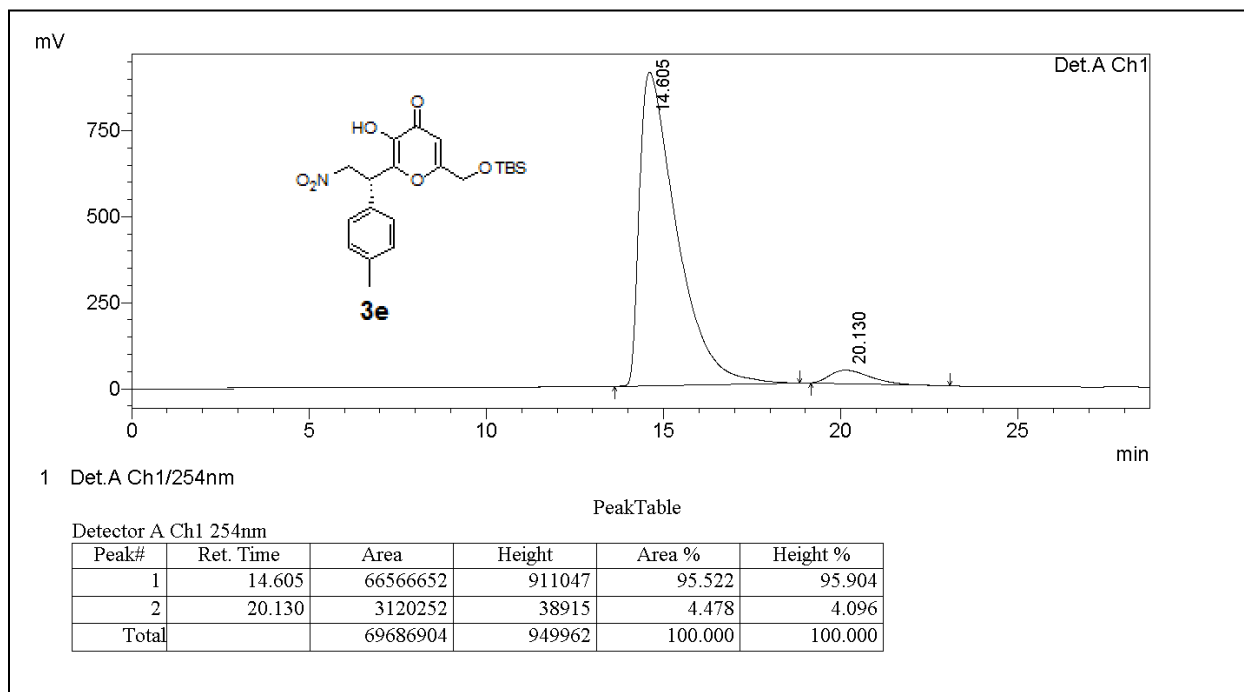

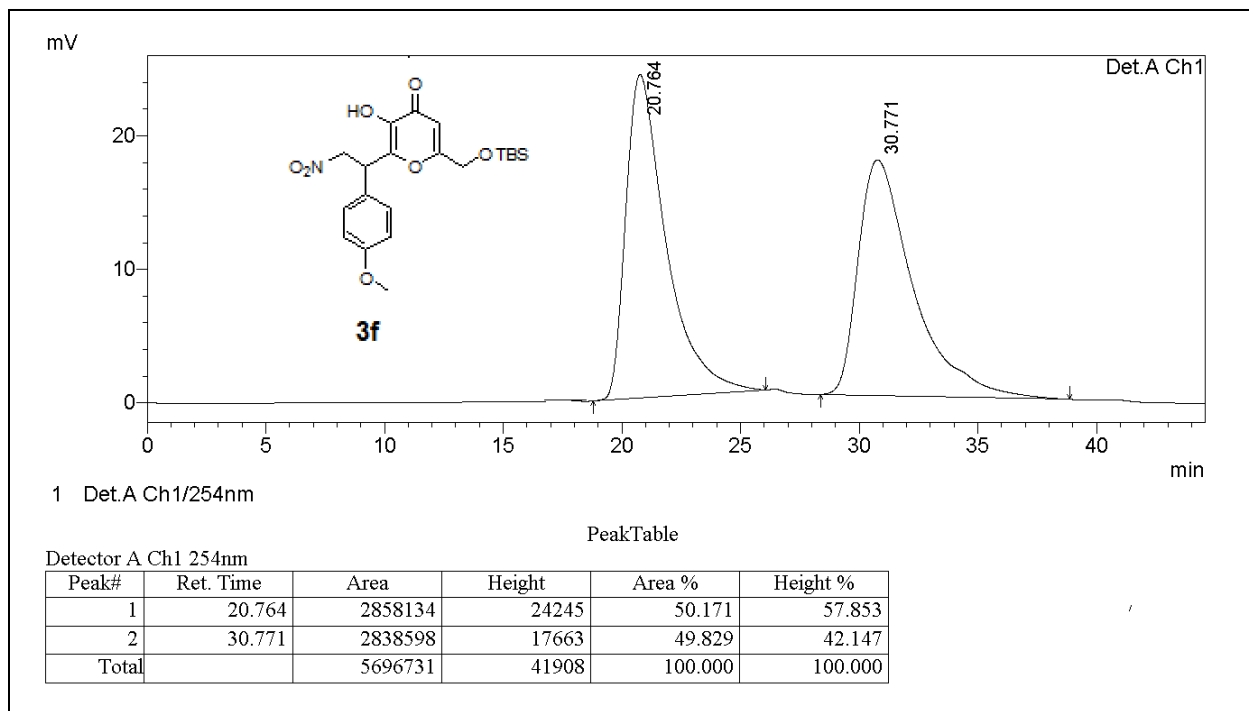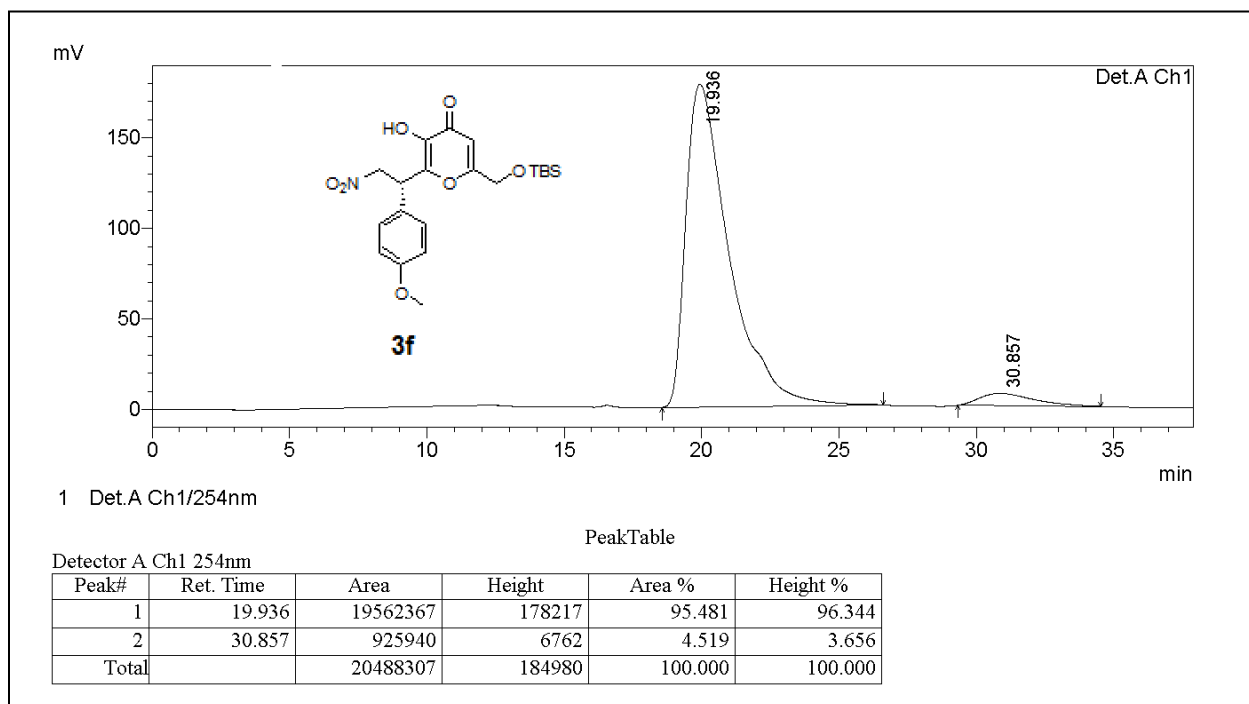

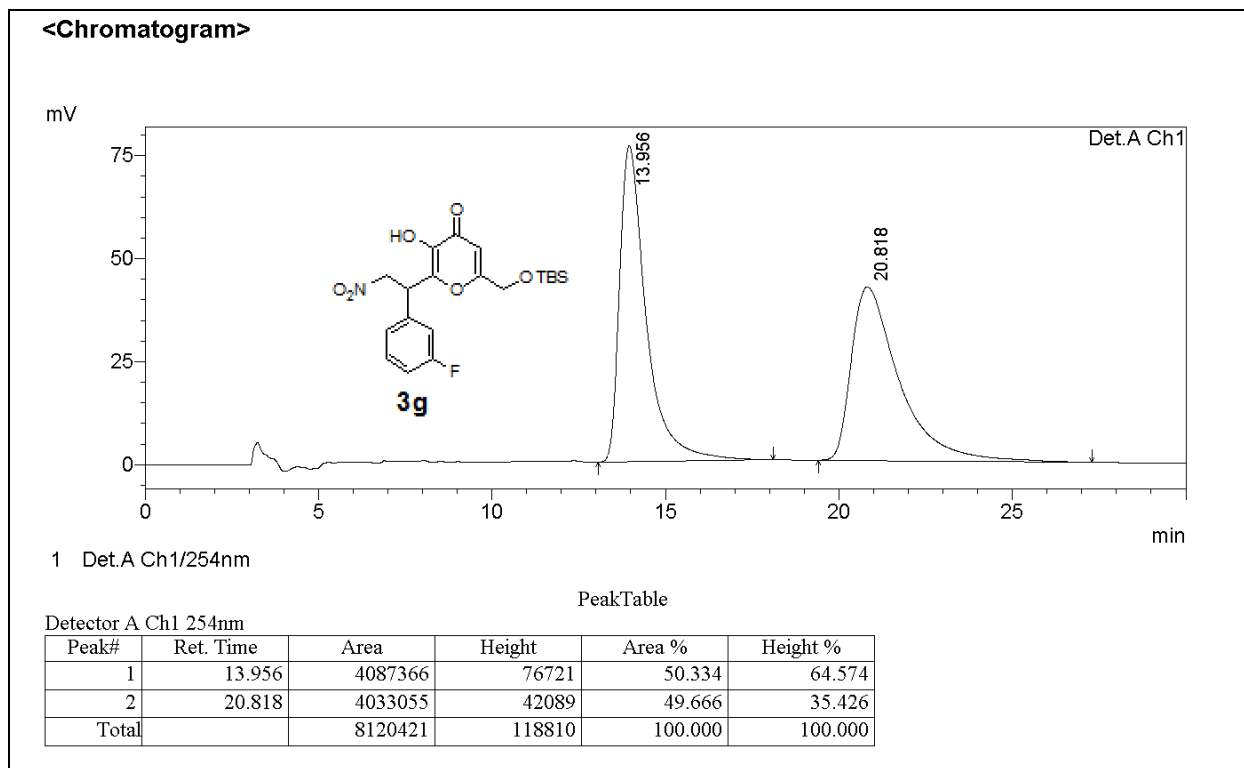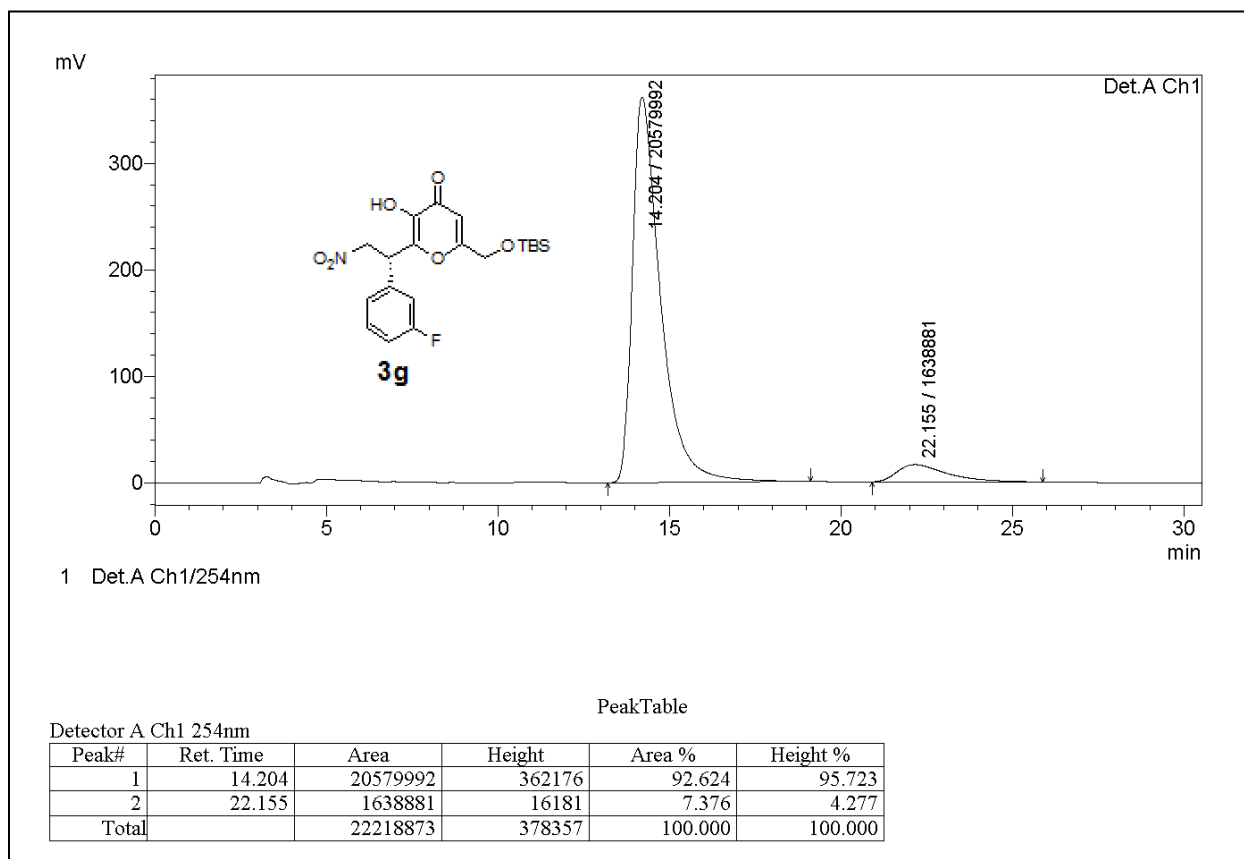

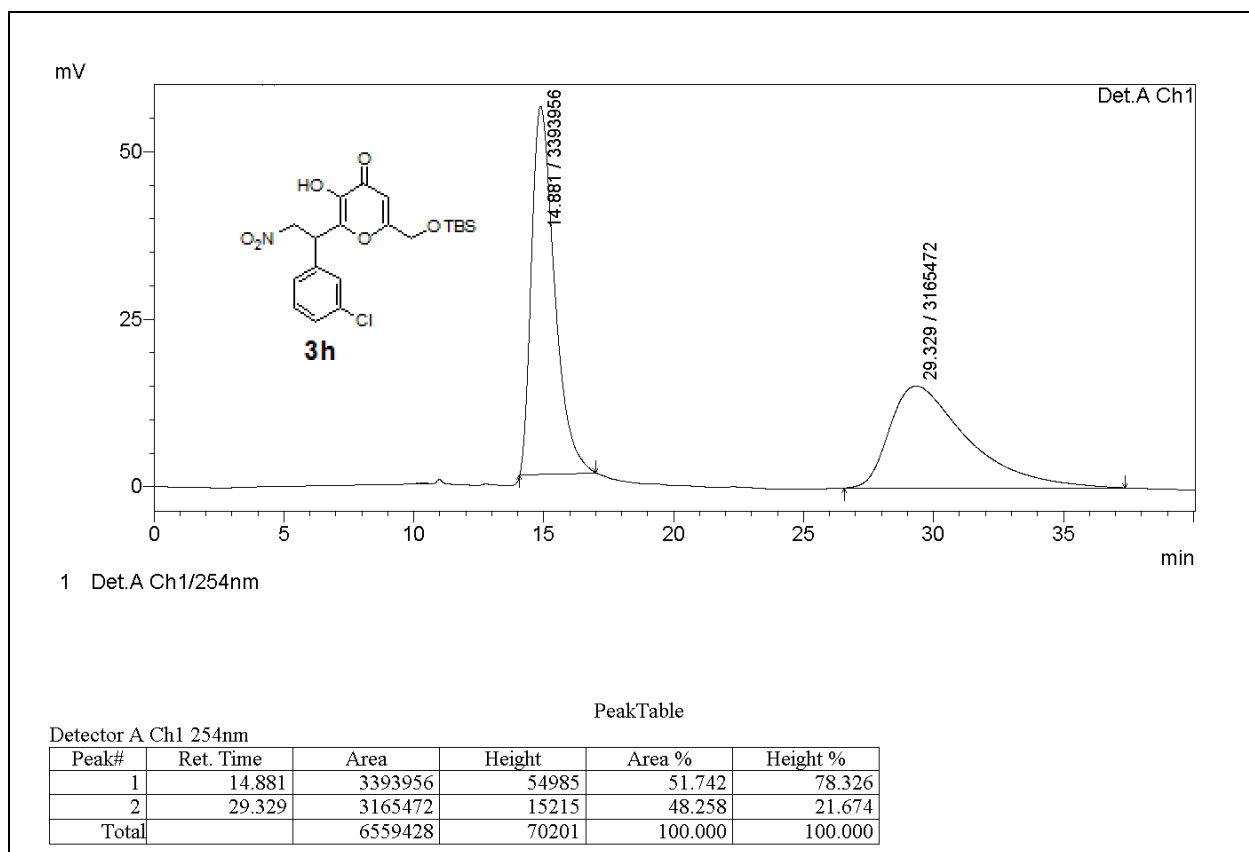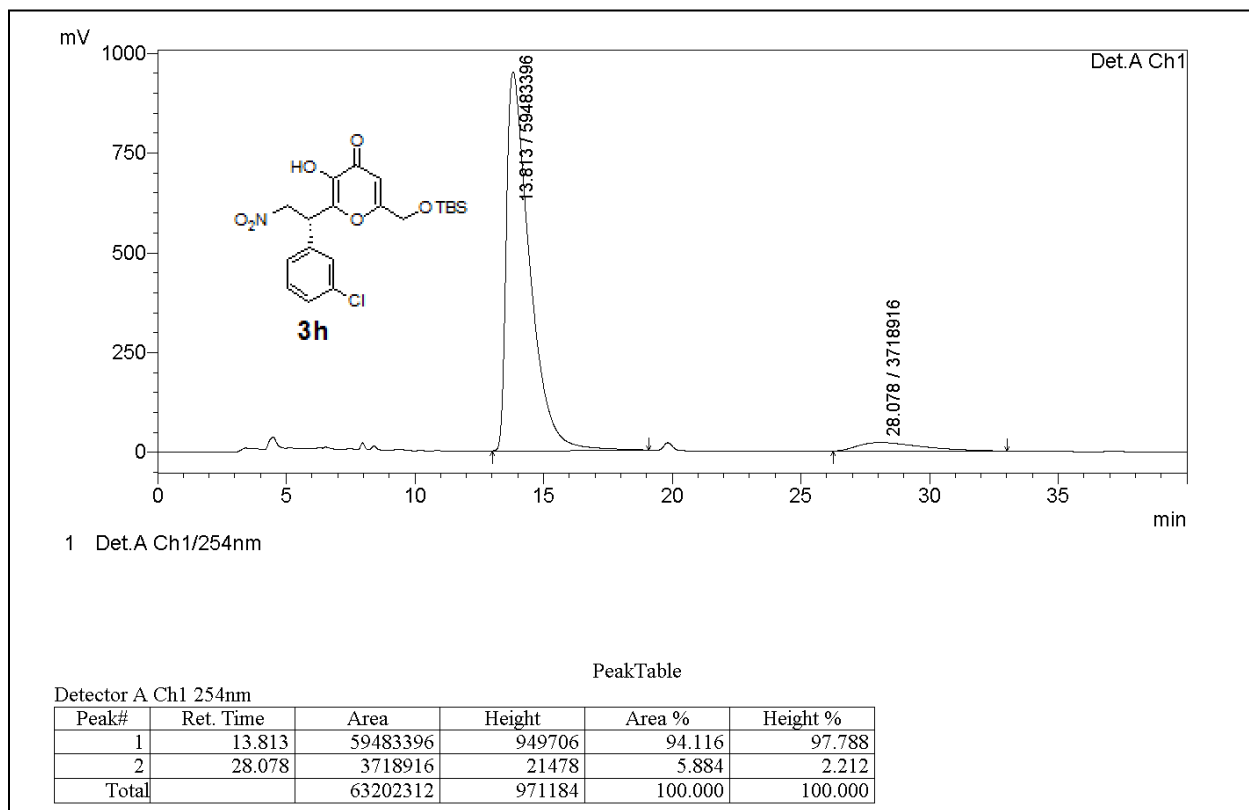

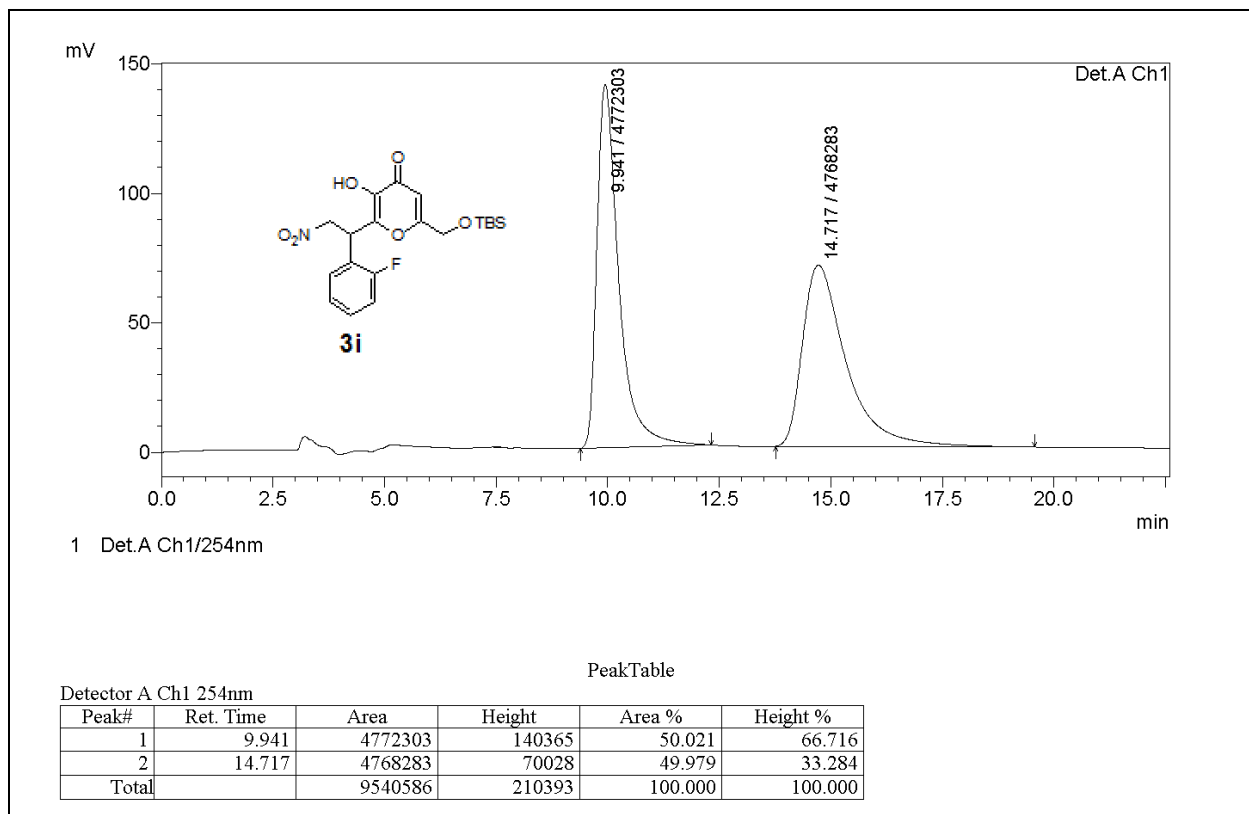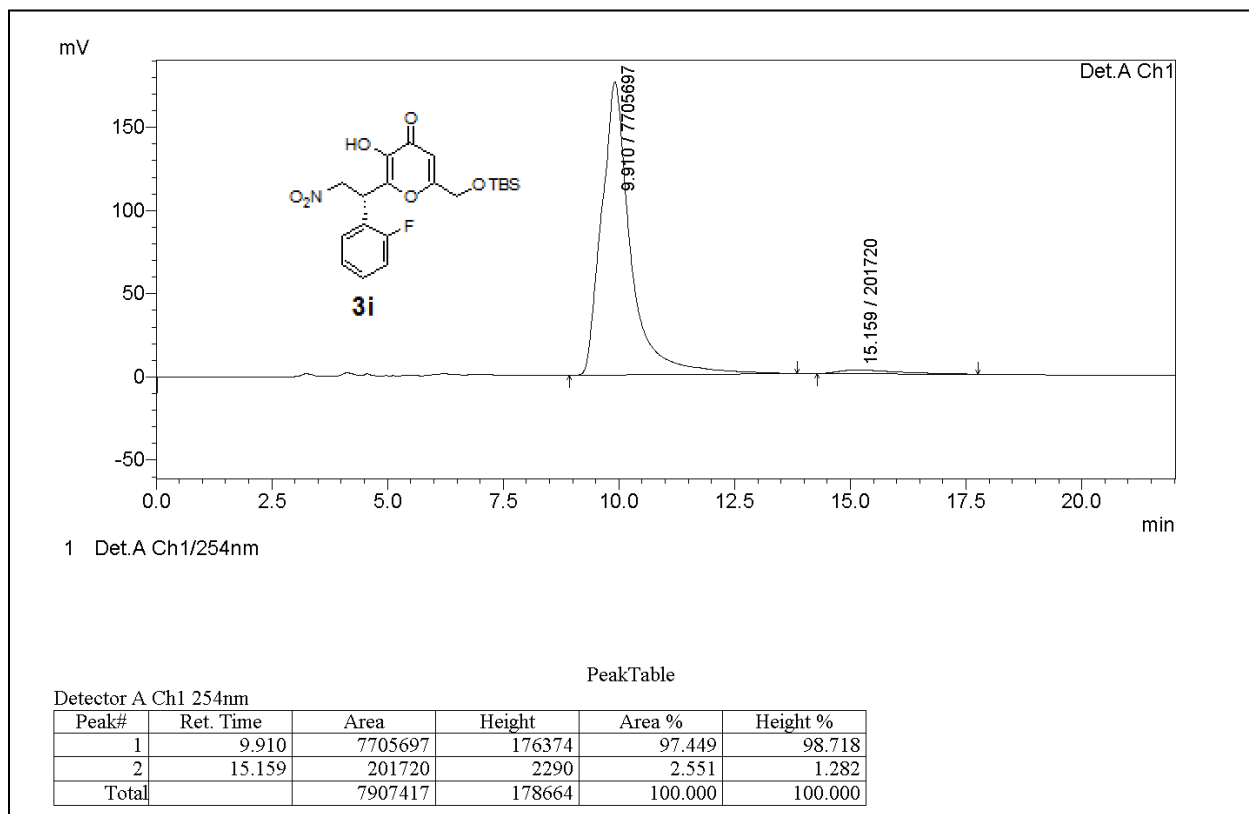

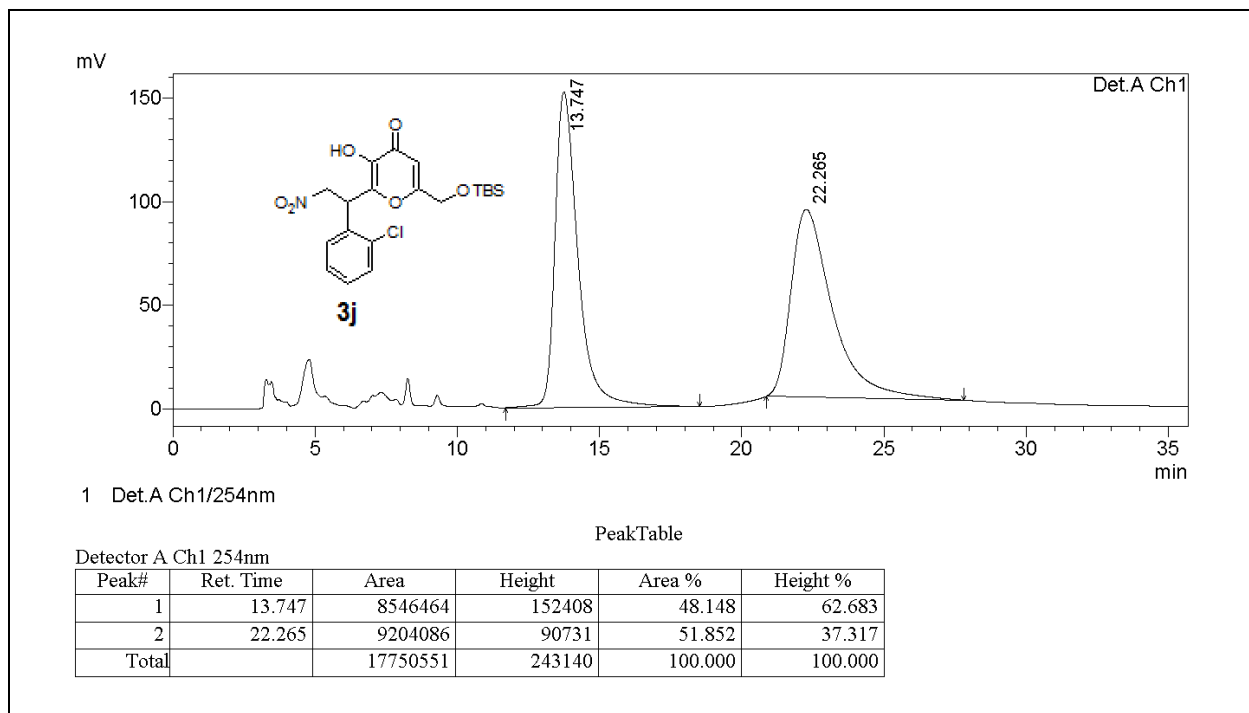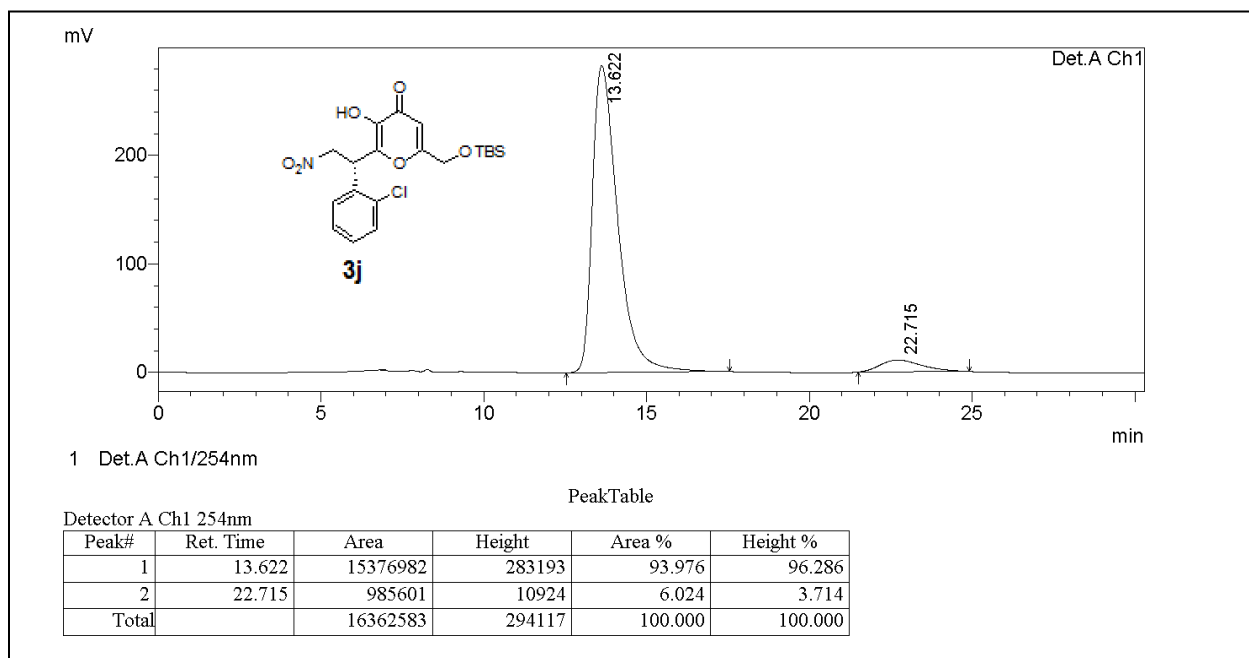

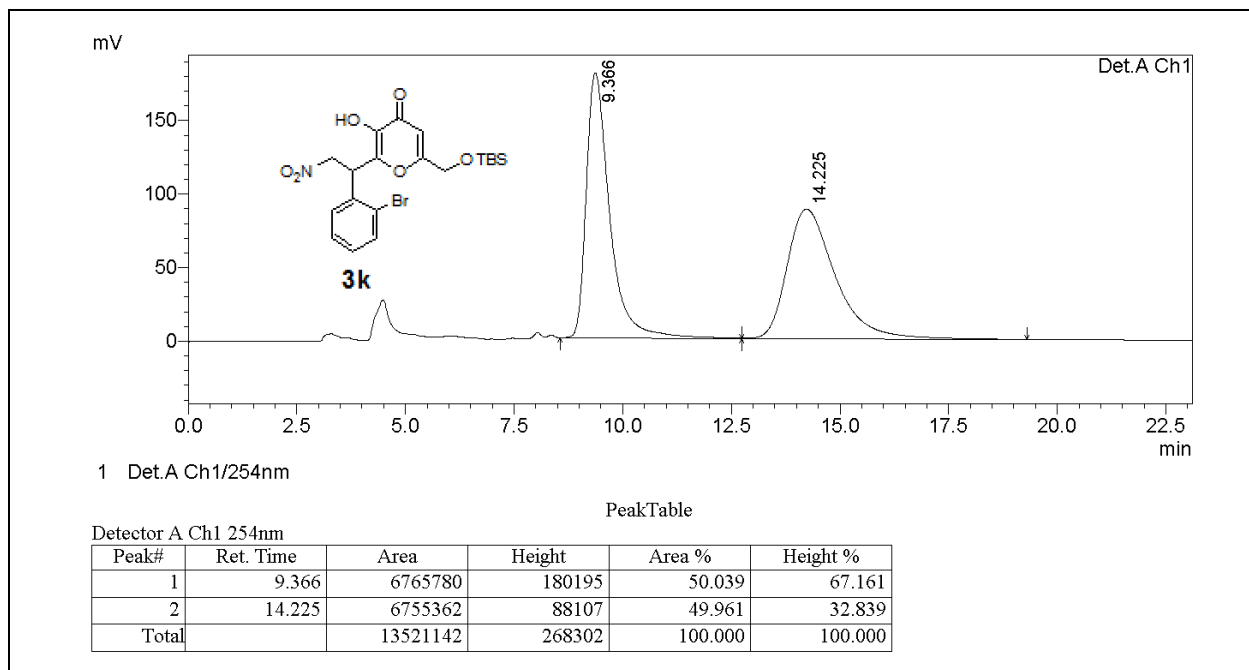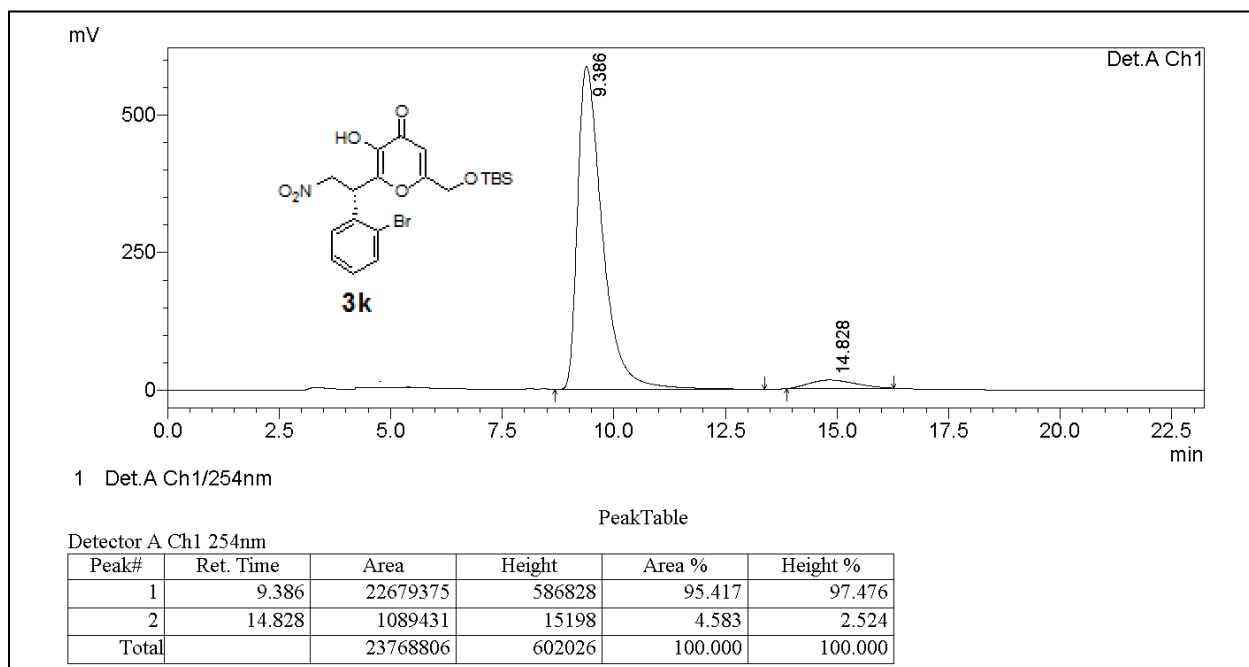

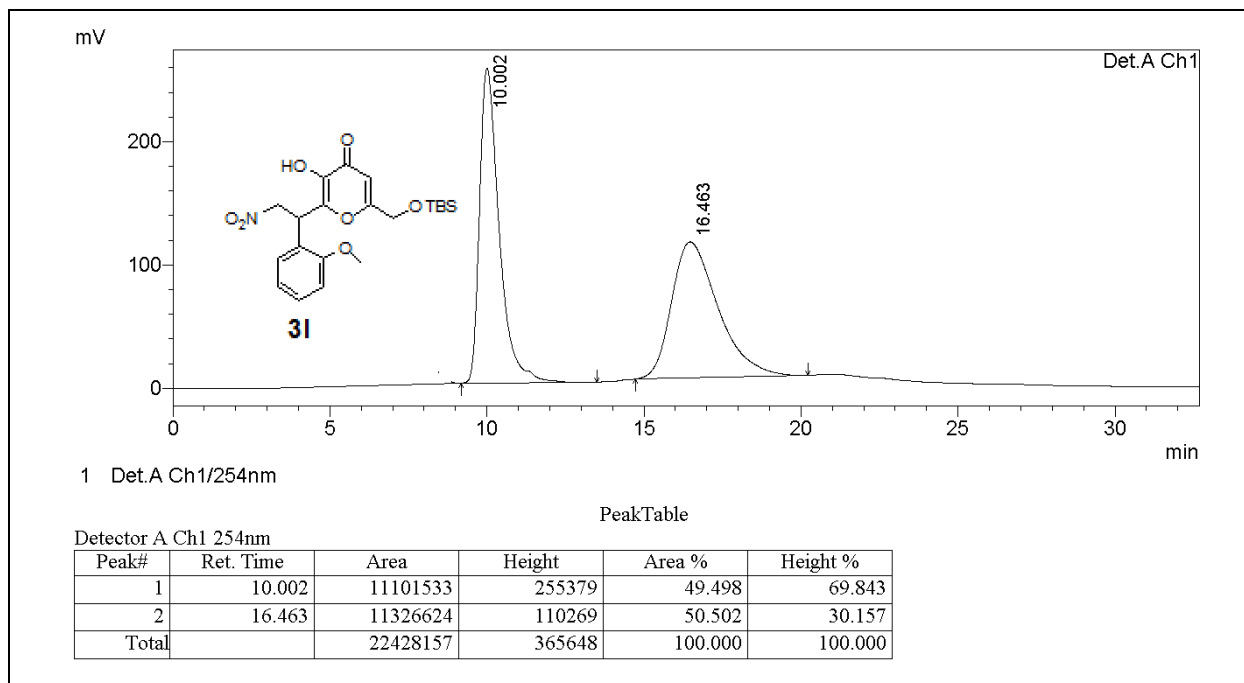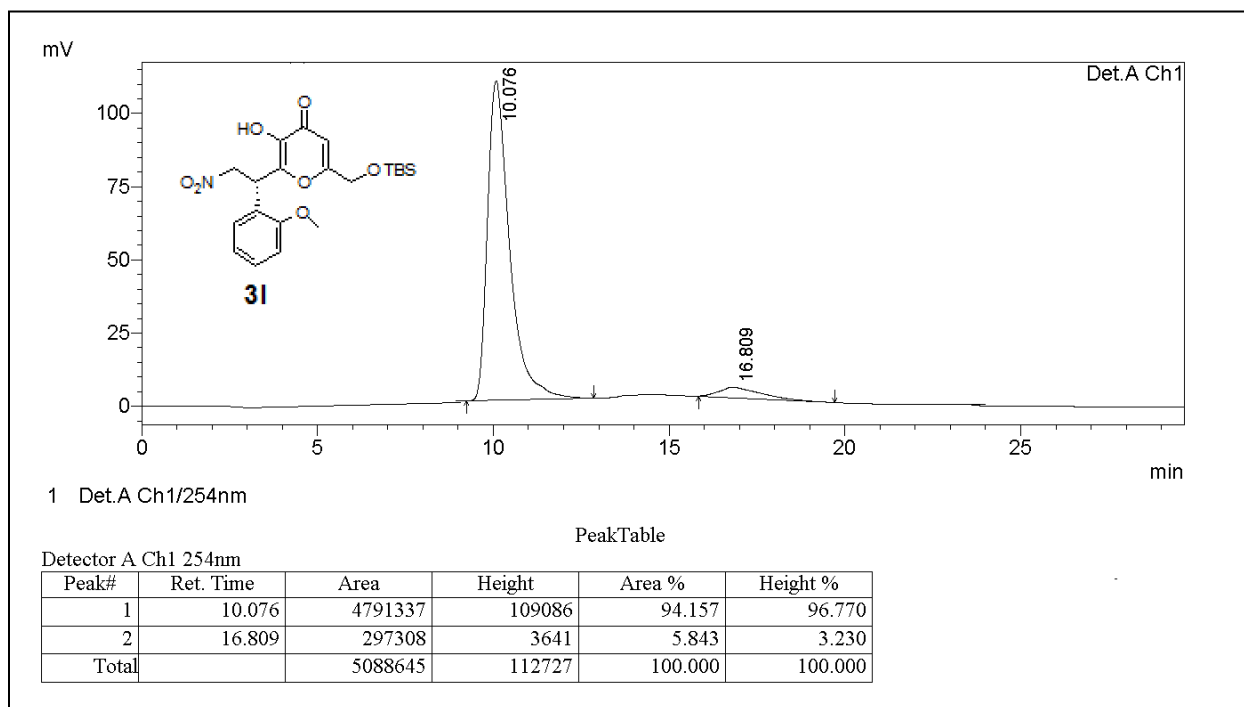



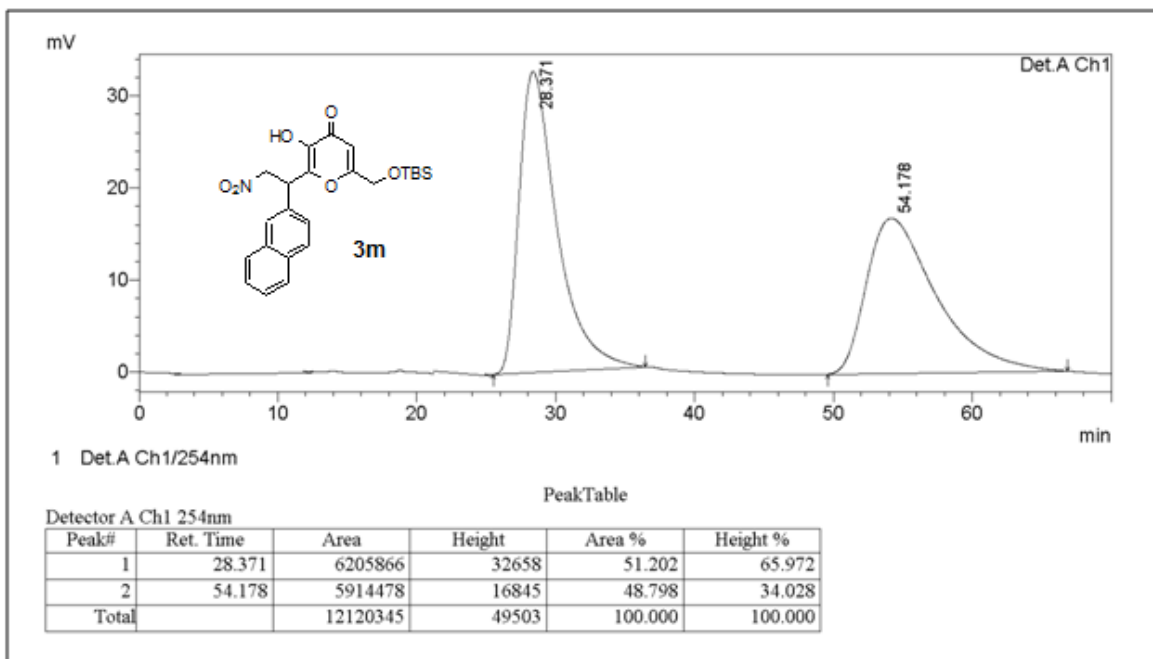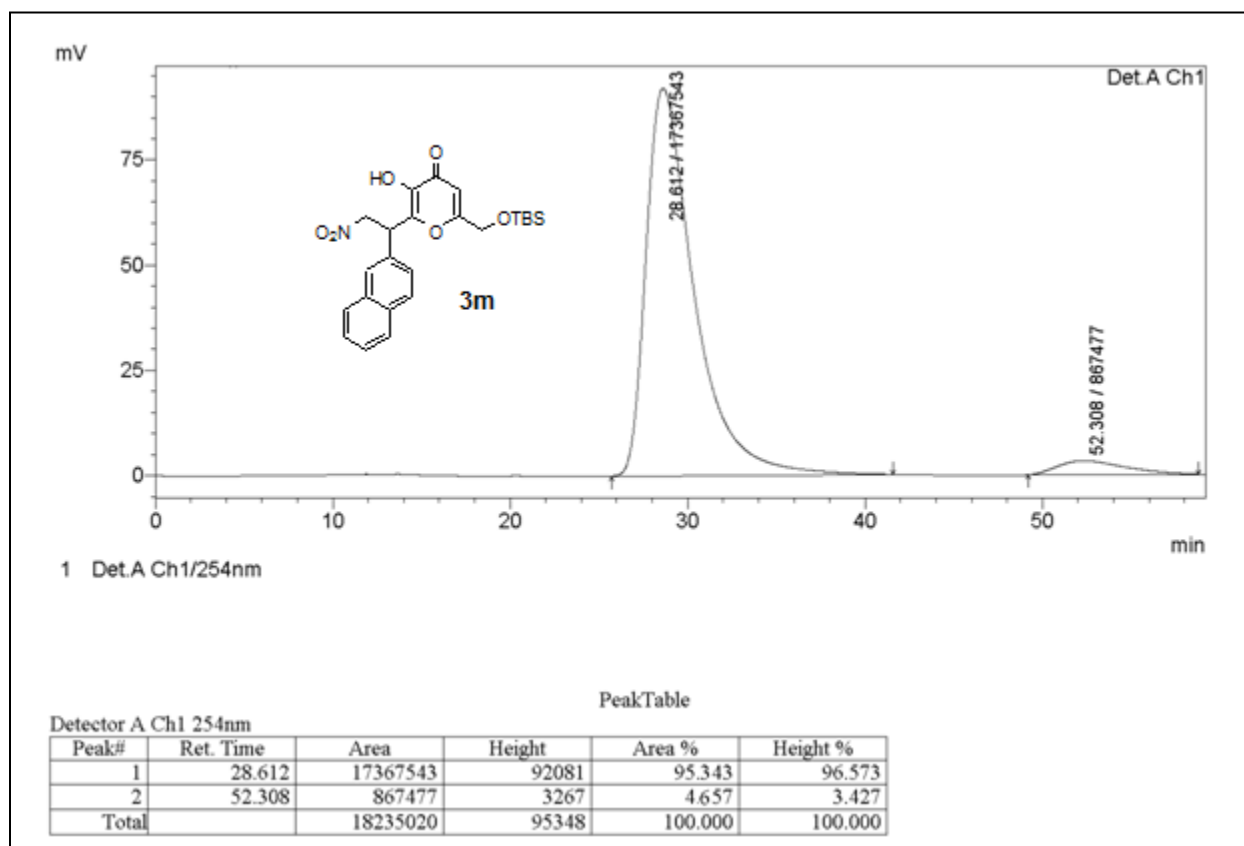

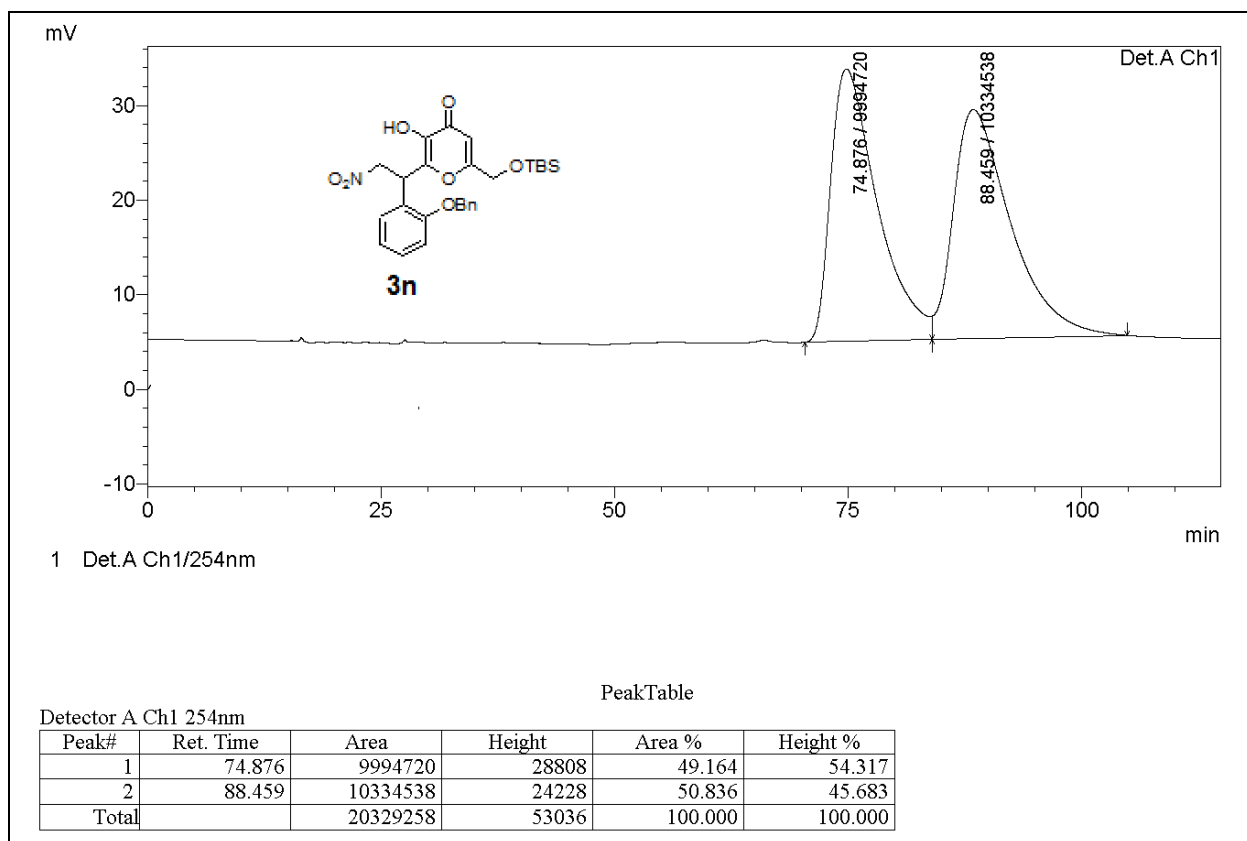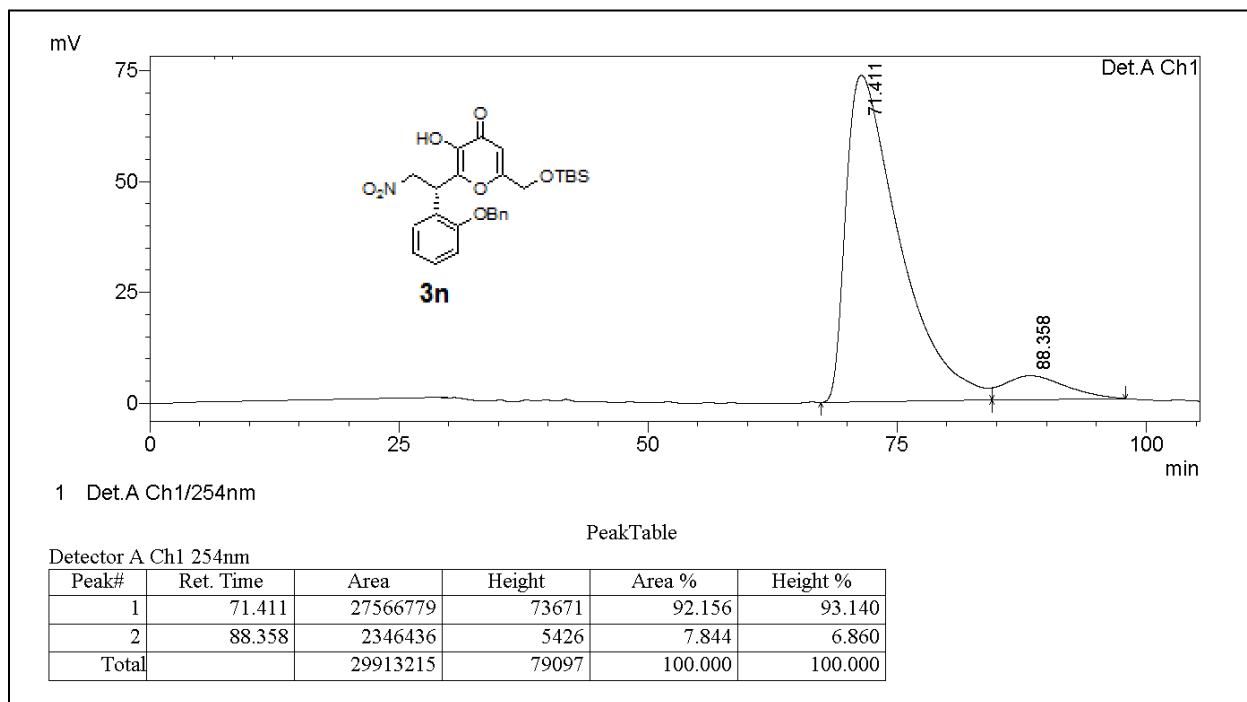

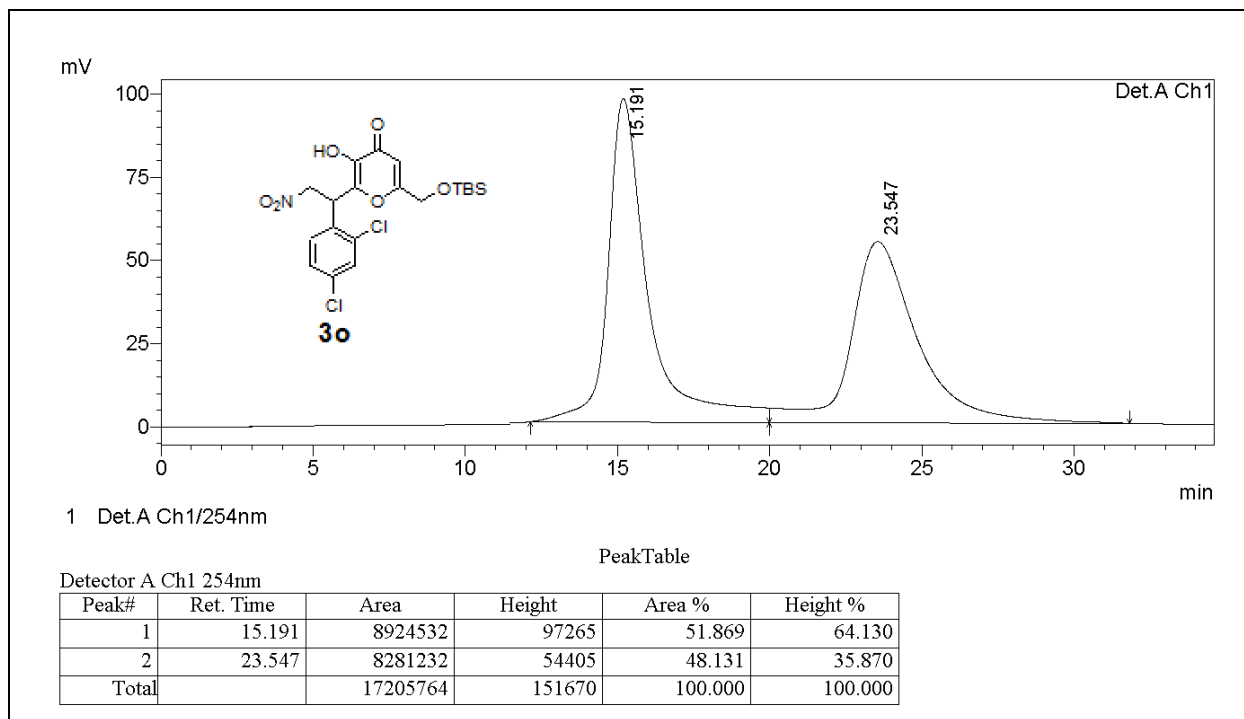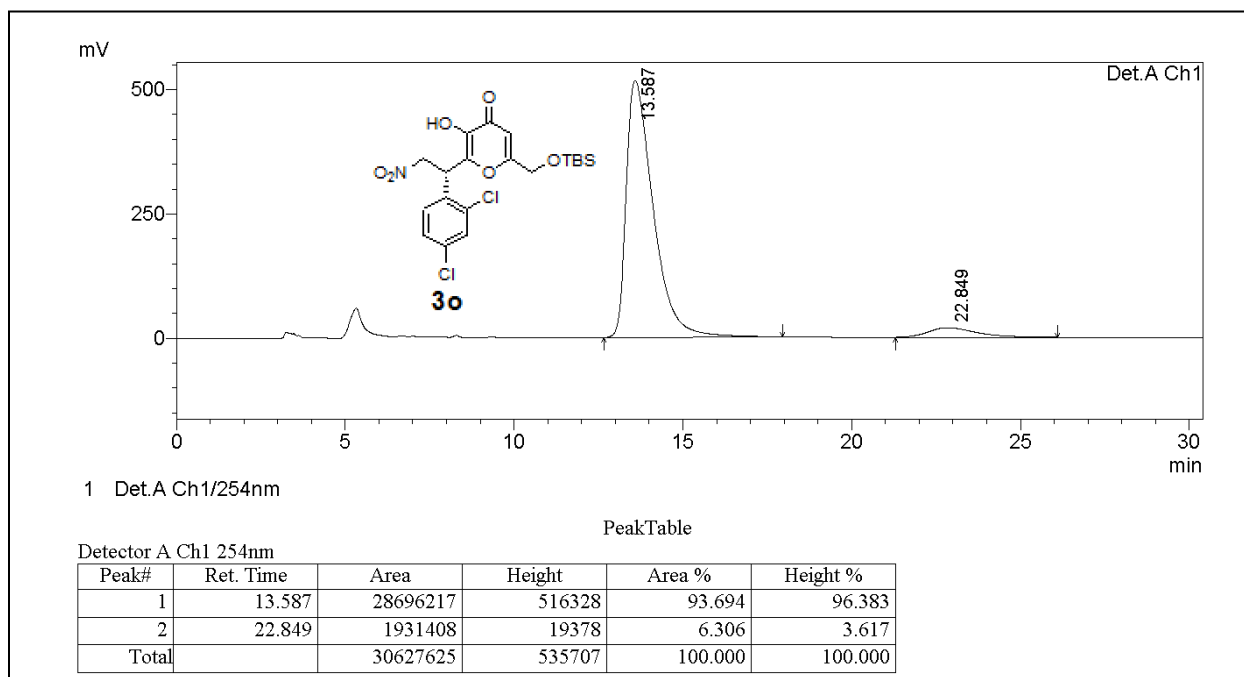

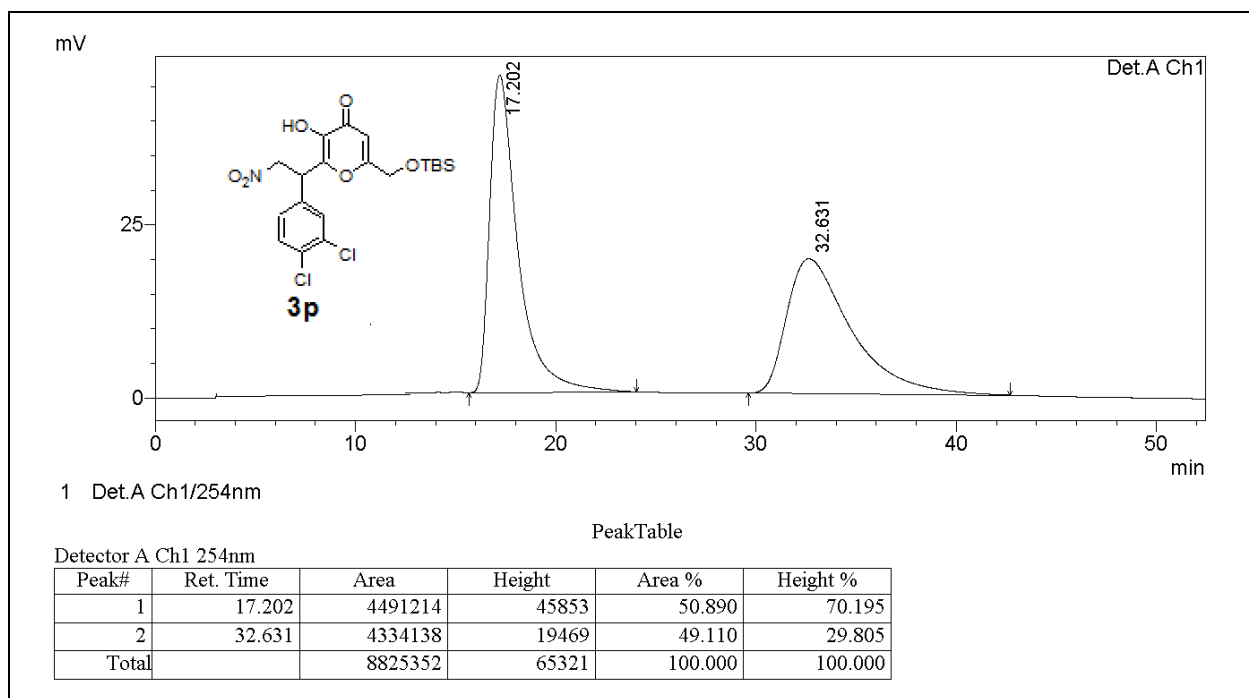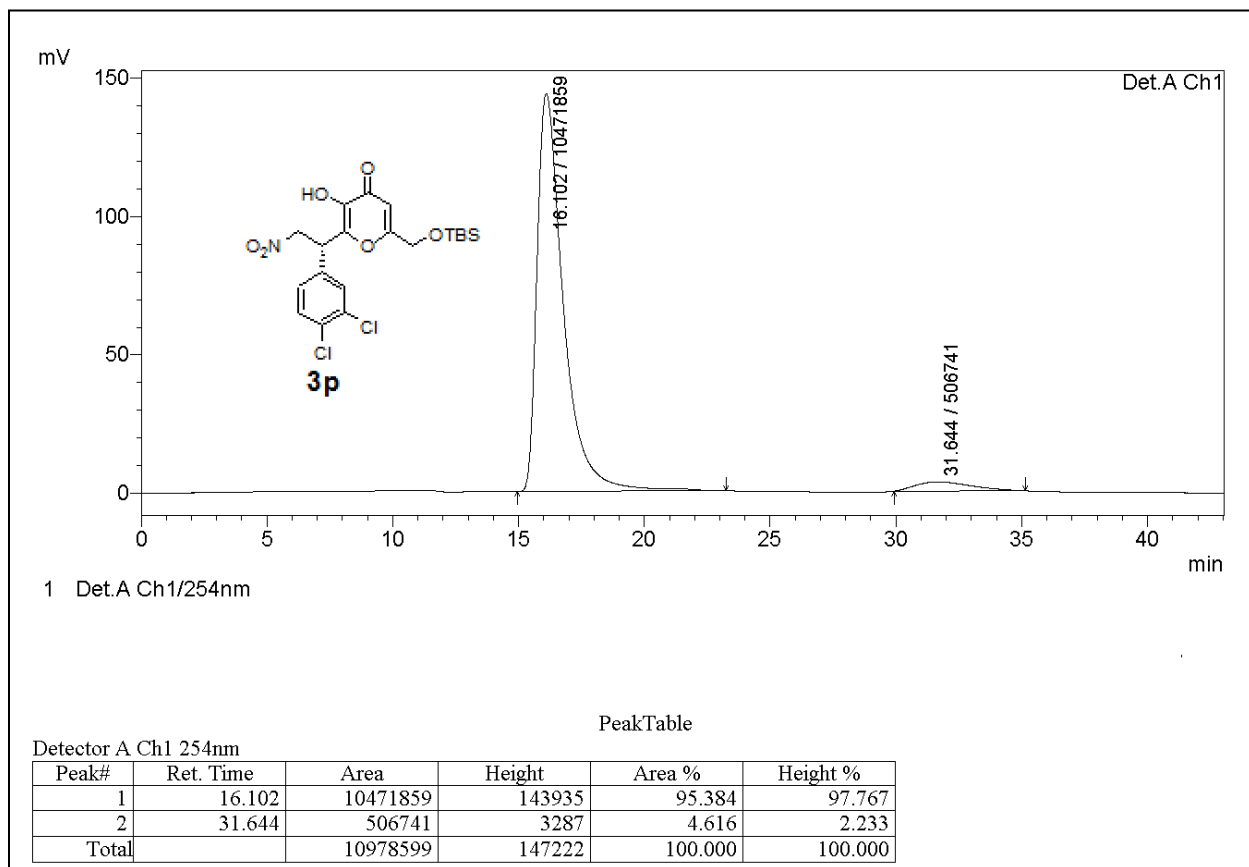

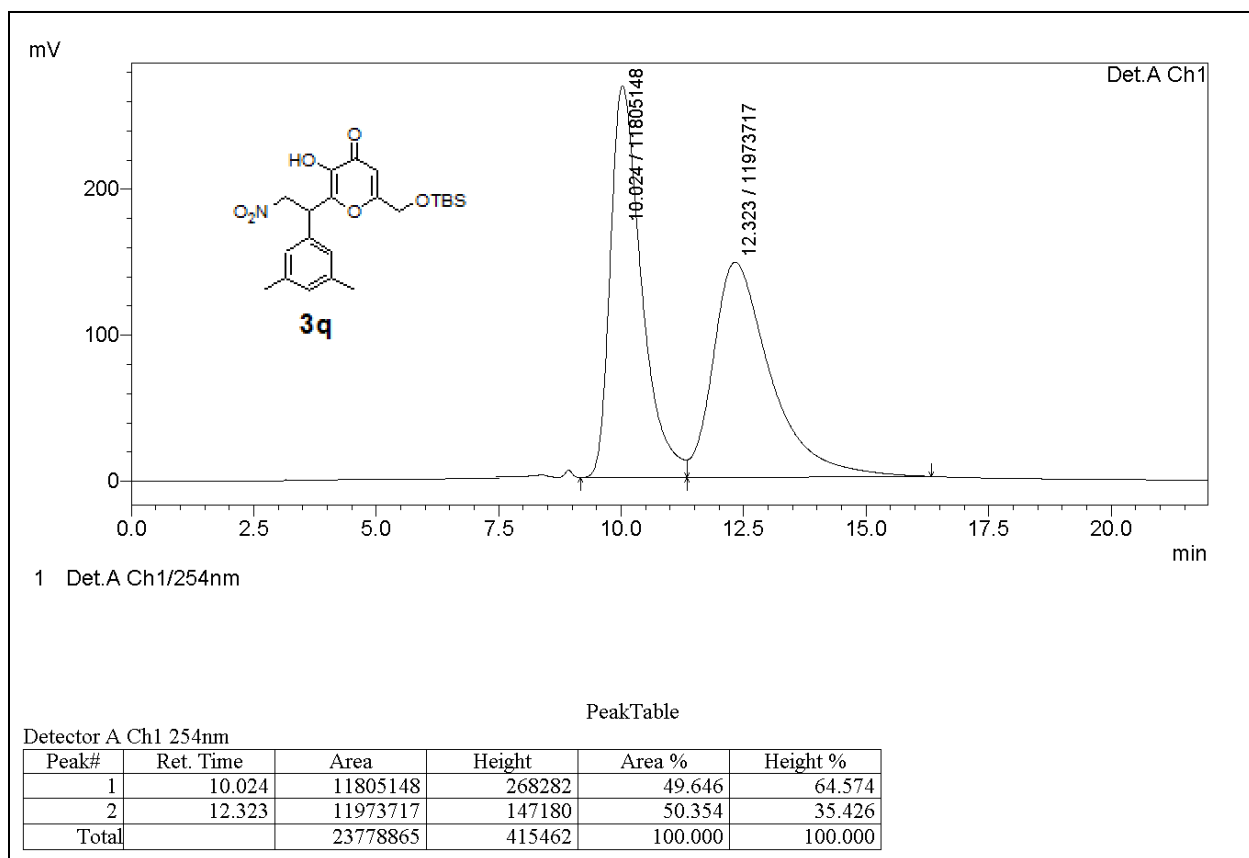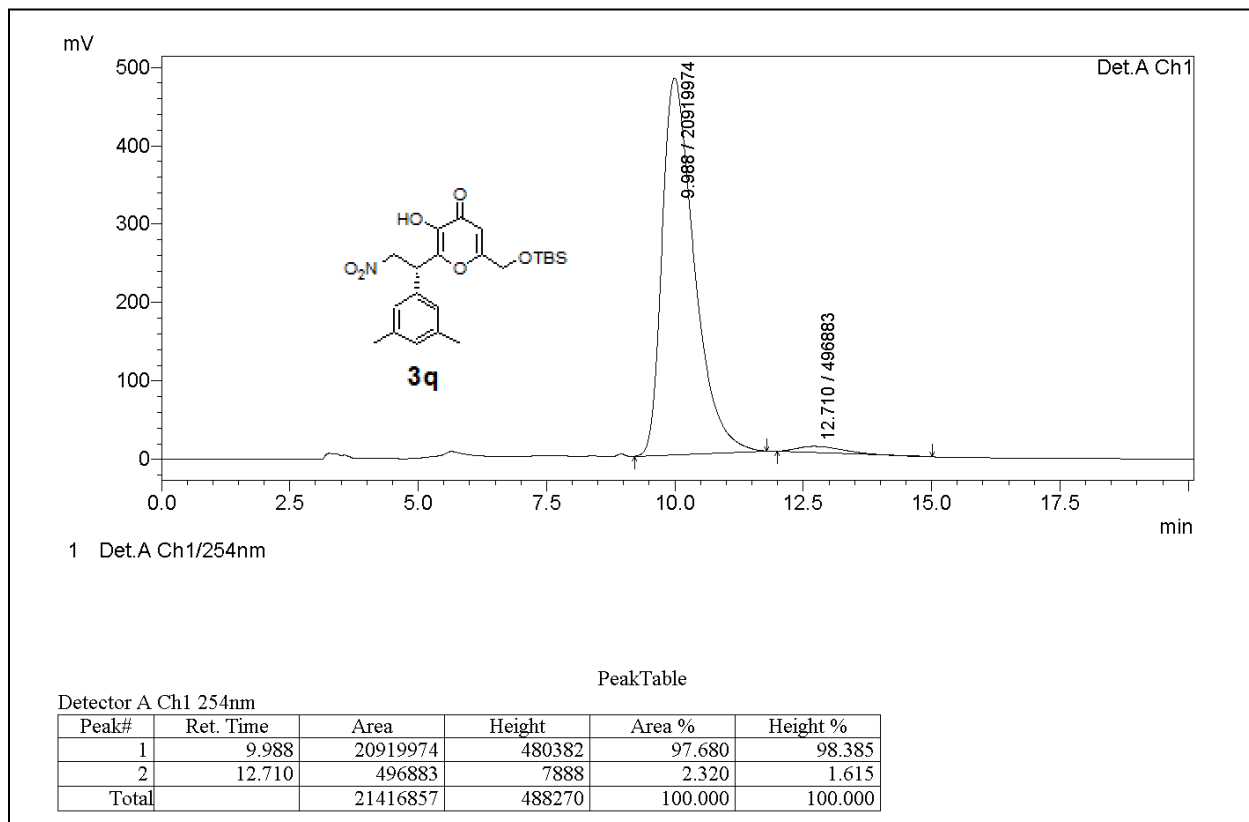

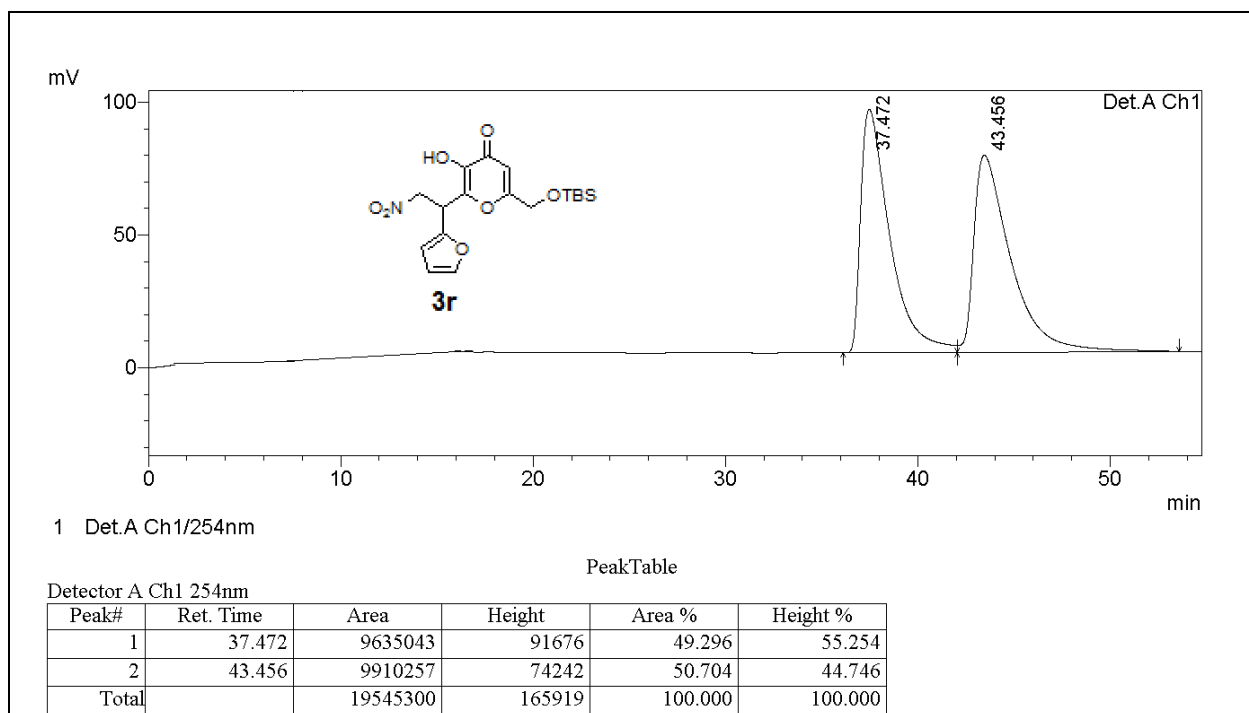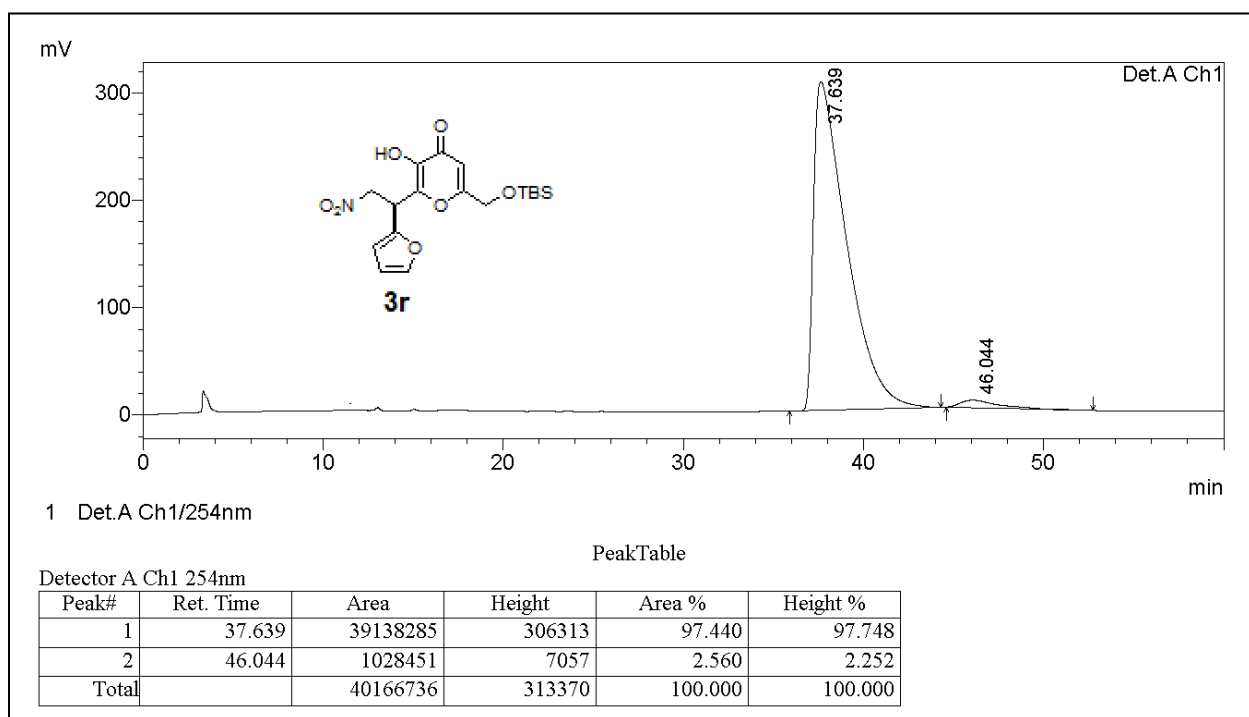

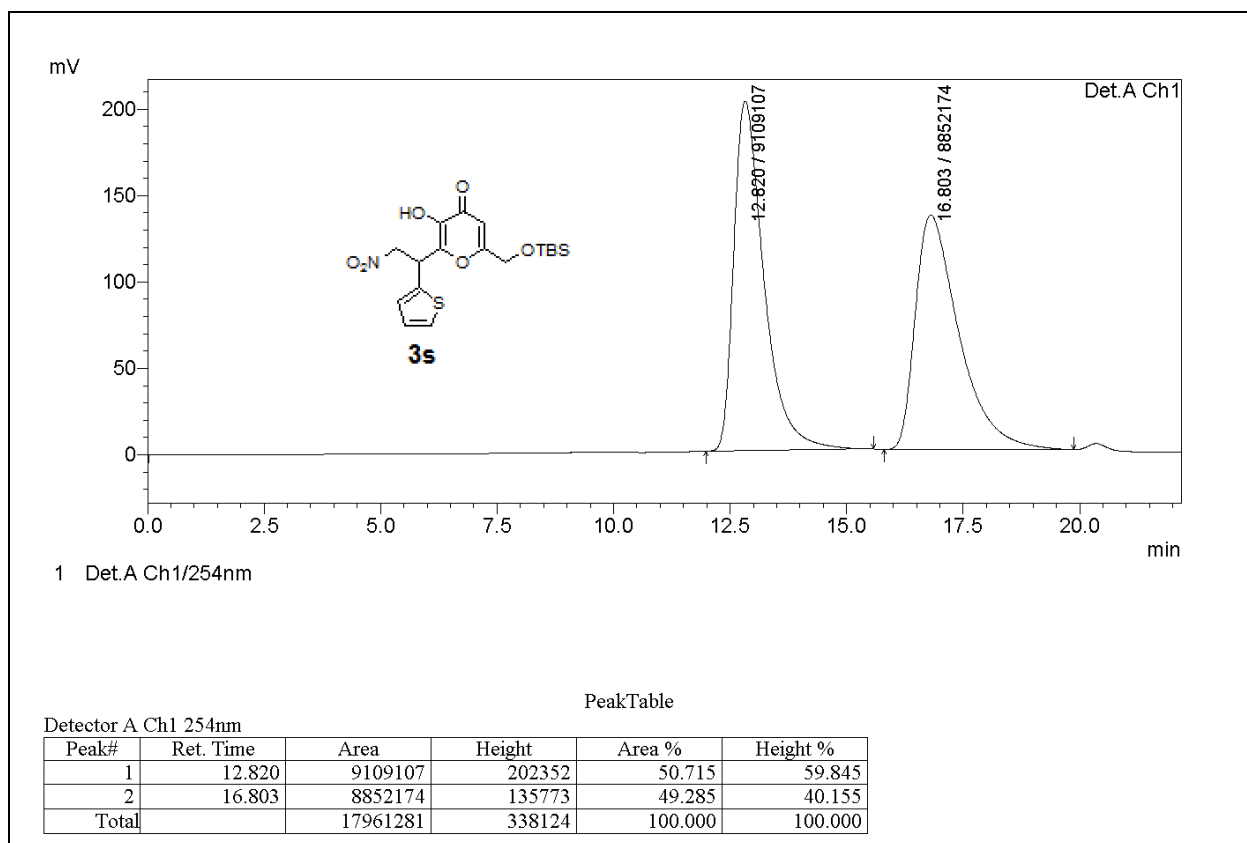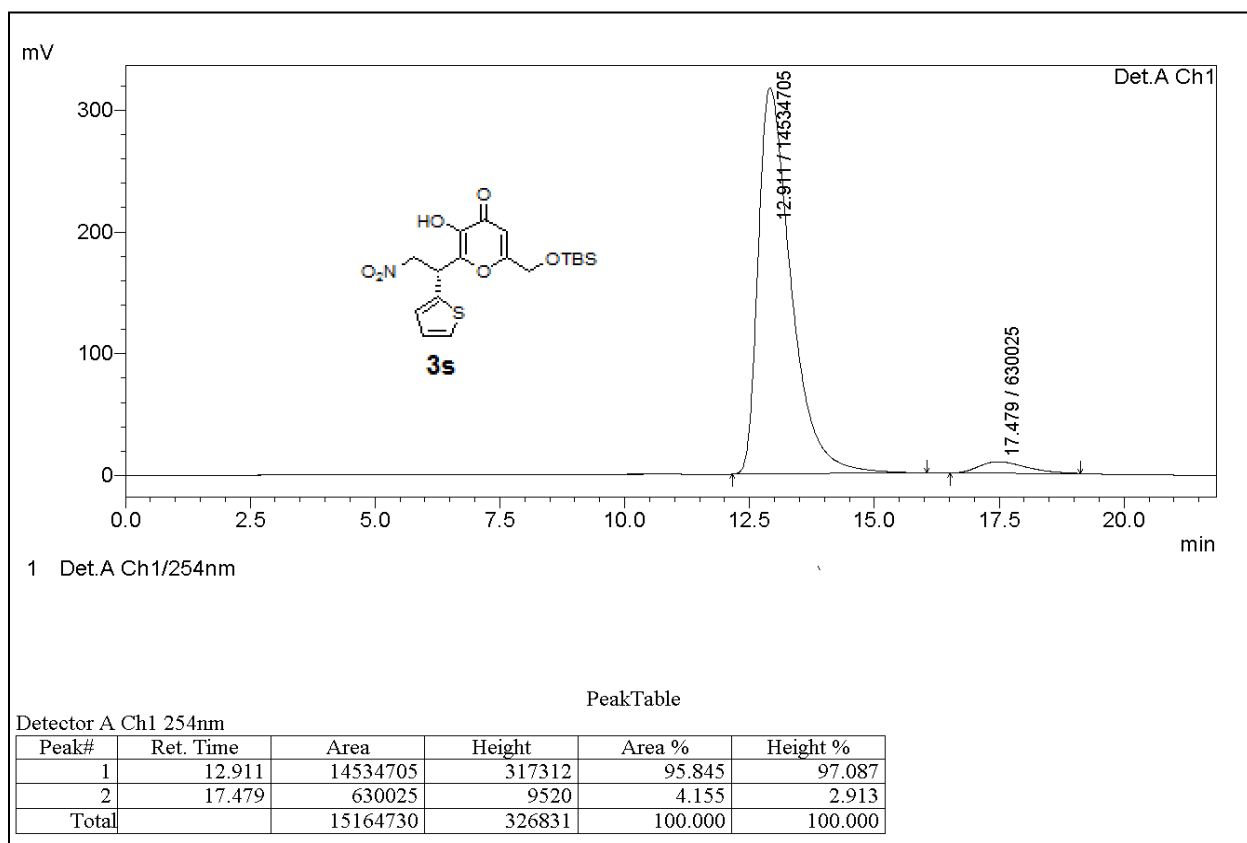

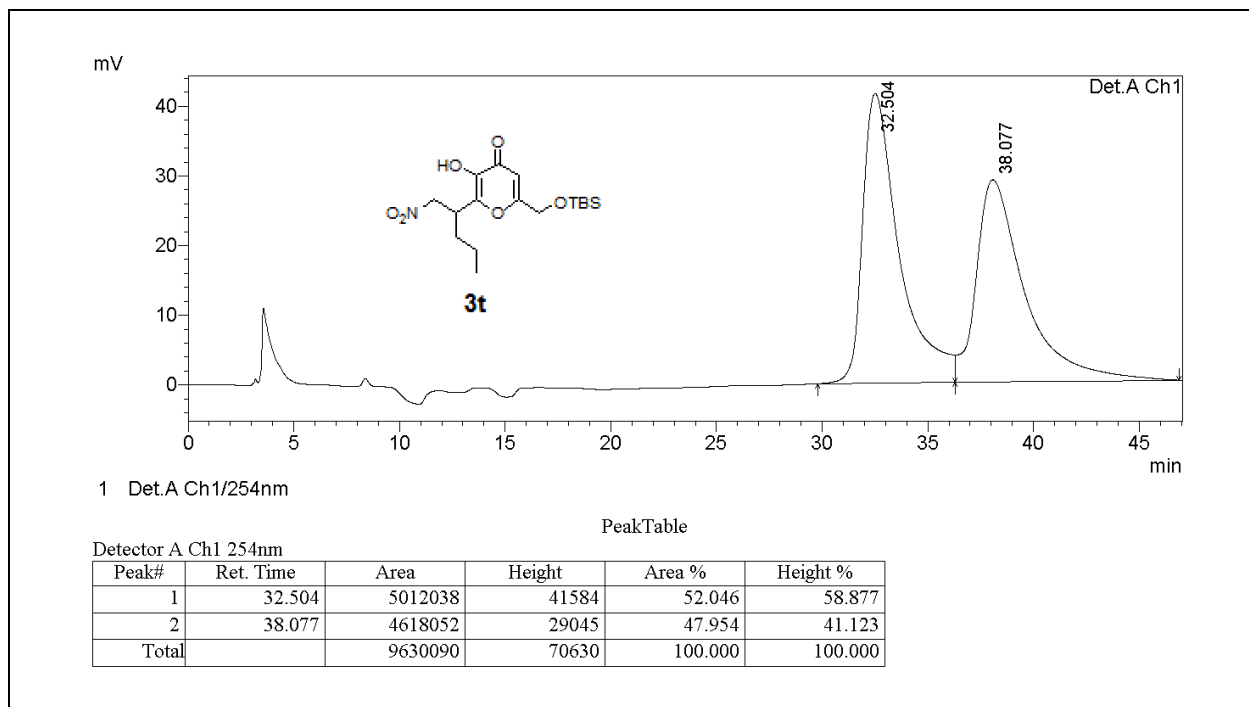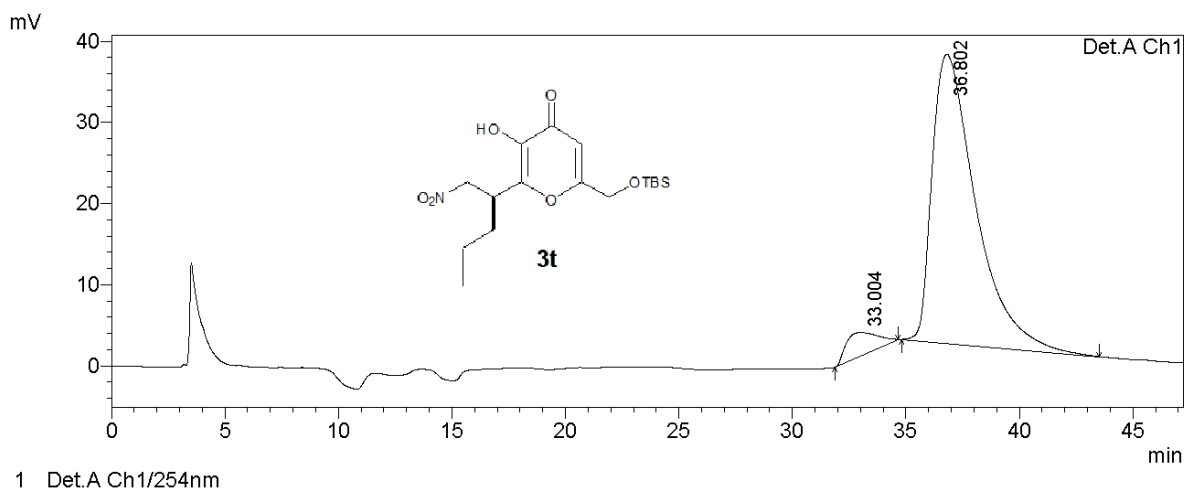



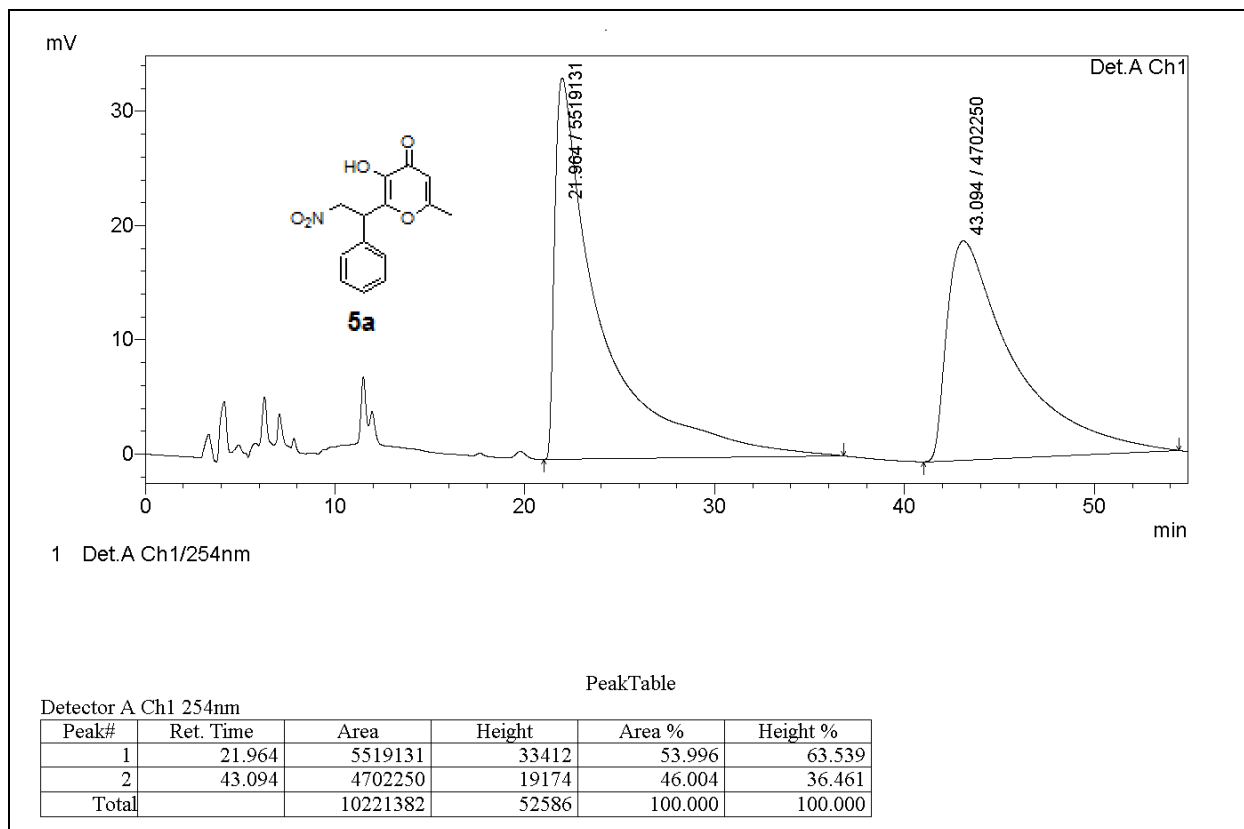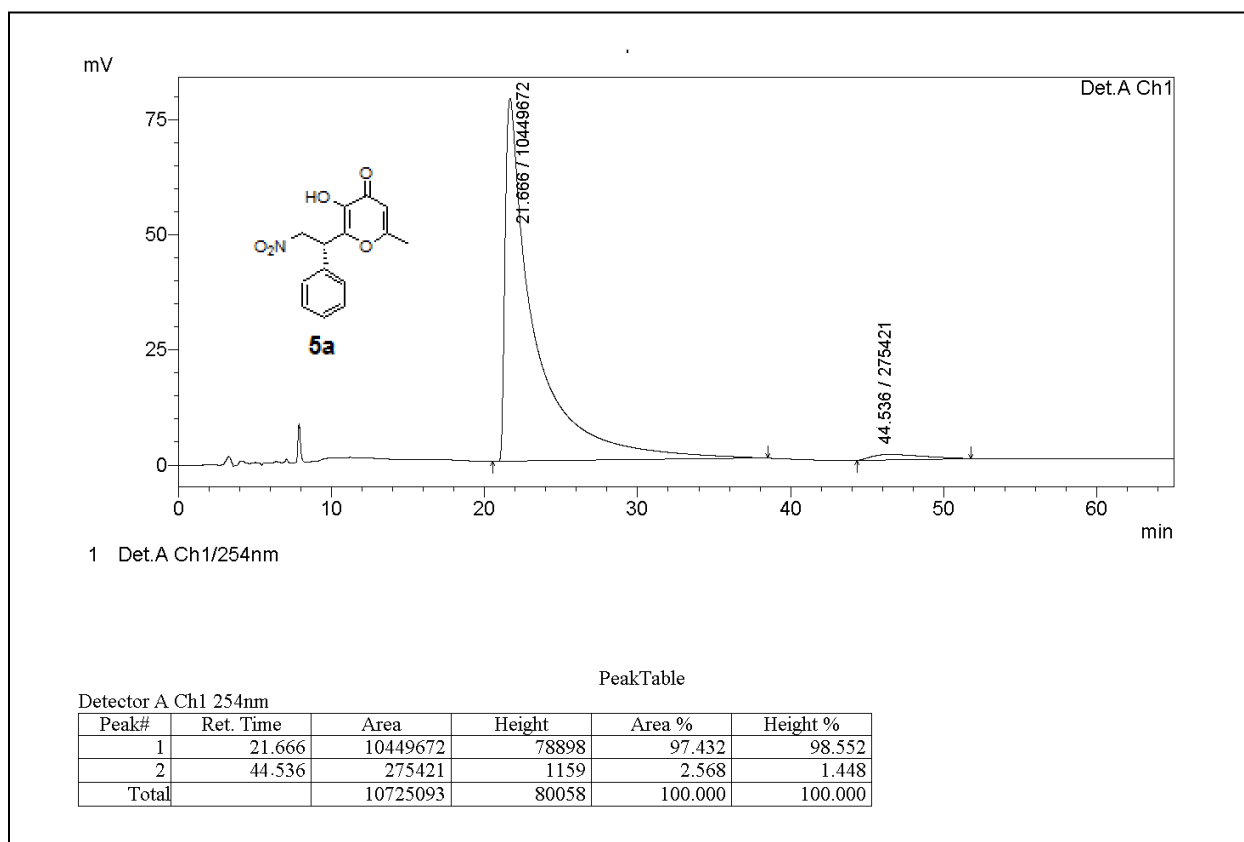

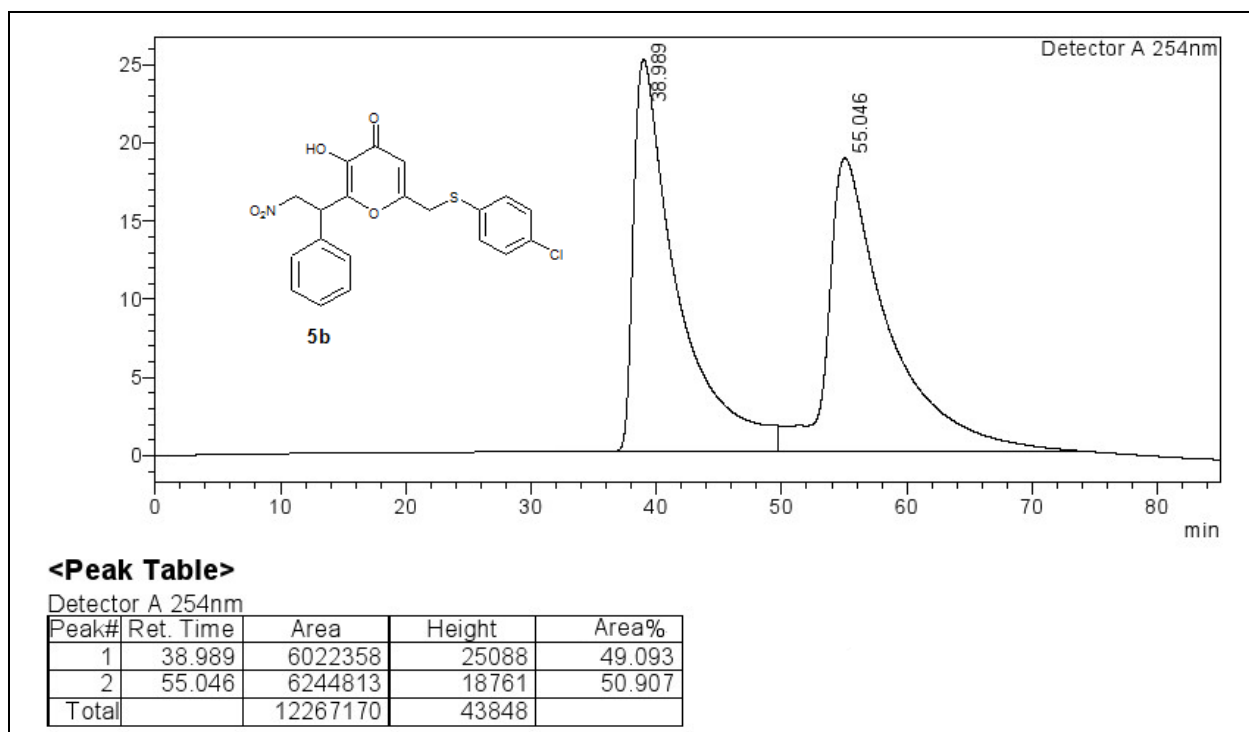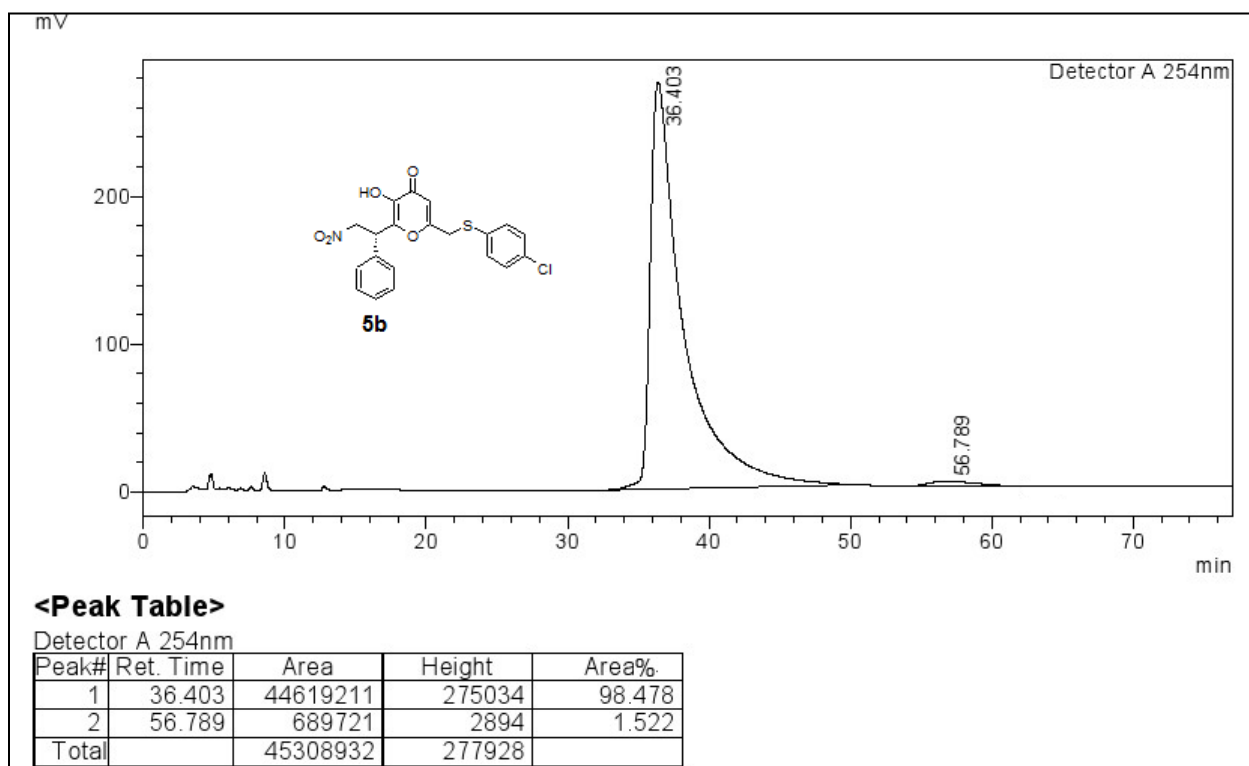

## 10. References.

- (1) (a) Y. Ma, W. Luo, P. J. Quinn, Z. D. Liu and, R. C. Hider, *J. Med. Chem.* 2004, **47**, 6349; (b) J. Farard, C. Logé, B. Pfeiffer, B. Lesur and M. Duflos, *Tetrahedron Lett.* 2009, **50**, 5729.
- (2) H. S. Rho, D. S. Yoo, S. M. Ahn, M. K. Kim, D. H. Cho and J. Y. Cho, *Bull. Korean Chem. Soc.* 2010, **31**, 3463.
- (3) (a) B. Vakulya, S. Varga, A. Csampai, T. Soos, *Org. Lett.* 2005, **7**, 1967; (b) S. H. McCooey, S. J. Connon, *Angew Chem. Int. Ed.* 2005, **44**, 6367.
- (4) (a) T. Lindhorst, C. Kieburg, *Synthesis.* 1995, **10**, 1228; (b) M. Selkti, R. Kassab, H. P. Lopez, F. Villain, C. J. deRango, *Carbohydr. Chem.* 1999, **18**, 1019.
- (5) X. Jiang, Y. Zhang, L. Wu, G. Zhang, X. Liu, H. Zhang, D. Fu, R. Wang, *Adv. Synth. Catal.* 2009, **351**, 2096.
- (6) J. Wang, Q. Zhang, H. Zhang, Y. Feng, W. Yuana, X. Zhang, *Org. Biomol. Chem.* 2012, **10**, 2950.
